# Supplementary material for: A domino reaction of 2-isocyanophenyloxyacrylate and aryne to synthesize arenes with vicinal olefin and benzoxazole
Source: Royal Society of Chemistry journal article supplement (doi:10.1039/c8cc05735d), 2018-01-01

## **Domino Reaction of 2-Isocyanophenyloxyacrylate and Aryne to Synthesize Arenes with Vicinal Olefin and Benzoxazole**

Shikuan Su,<sup>†</sup> Jianxiong Li,<sup>‡</sup> Mingming Sun,<sup>‡</sup> Hongbin Zhao,<sup>†</sup> Yali Chen,<sup>\*,†,‡</sup> and Jian Li<sup>\*,†,‡</sup>

<sup>†</sup> School of Materials Science and Engineering, Shanghai University, 99 Shangda Road, Shanghai 200444, P. R. China

<sup>‡</sup> Department of Chemistry, Center for Supramolecular Chemistry and Catalysis, Shanghai University, 99 Shangda Road, Shanghai, 200444, P.R. China

E-mail: [ylchen@staff.shu.edu.cn](mailto:ylchen@staff.shu.edu.cn); [lijian@shu.edu.cn](mailto:lijian@shu.edu.cn)

### **Supporting Information**

#### **Table of Contents**

|          |                                                                          |            |
|----------|--------------------------------------------------------------------------|------------|
| <b>1</b> | <b>General Information</b>                                               | <b>S2</b>  |
| <b>2</b> | <b>Preparation of Substrates 1 and the Analytical Data</b>               | <b>S2</b>  |
| <b>3</b> | <b>General Procedure</b>                                                 | <b>S8</b>  |
| <b>4</b> | <b>Characterization Data</b>                                             | <b>S9</b>  |
|          | Spectroscopic Data of All Compounds                                      | S9         |
| <b>5</b> | <b><sup>1</sup>H NMR and <sup>13</sup>C NMR Spectra of All Compounds</b> | <b>S18</b> |

## 1 General Information

The NMR spectra were recorded on Bruker AC – 500 spectrometer (500 MHz for  $^1\text{H}$  NMR and 125 MHz for  $^{13}\text{C}$  NMR) with  $\text{CDCl}_3$  as the solvent and TMS as internal reference.  $^1\text{H}$  NMR spectral data were reported as follows: chemical shift ( $\delta$ , ppm), multiplicity, integration, and coupling constant (Hz).  $^{13}\text{C}$  NMR spectral data were reported in terms of the chemical shift. The following abbreviations were used to indicate multiplicities: s = singlet; d = doublet; t = triplet; q = quartet; m = multiplet. Low-resolution mass spectra were obtained on a Shimadzu LCMS-2010EV spectrometer in ESI mode and reported as  $m/z$ . High-resolution mass spectra (HRMS) were recorded on a Bruker Daltonics, Inc. APEXIII 7.0 TESLA FTMS instrument. Melting points were obtained on a X-4 digital melting point apparatus without correction. Chemical yields referred to pure isolated product. Purification of products was accomplished by column chromatography packed with silica gel. Unless otherwise stated, all reagents were commercially purchased and used without further purification. Aryne precursors **1** were prepared following published procedures.<sup>1, 2</sup>

## 2 Representative procedure for the preparation of substrates **1**

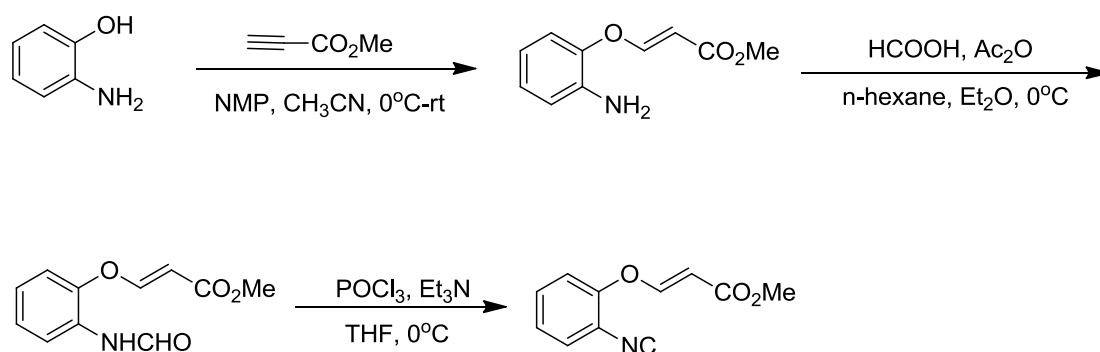

**Setp 1:** In a 100 mL round-bottom flask, a mixture of 2-aminophenol (20 mmol, 1 equiv) propiolate (24 mmol, 1.2 equiv) was dissolved in acetonitrile (60 mL) and was cooled to  $0^\circ\text{C}$ . Then N-methylmorpholine (1.2 mmol, 0.06 equiv) was added into the reaction mixture. The reaction mixture was allowed to warmed to room temperature and stirred for 12 h. After the solvent was removed, the crude product was purified by column chromatography to afford (*E*)-methyl 3-(2-aminophenoxy)acrylate (3.32 g, 86%) as a yellow liquid.<sup>3</sup>

**Step 2:** Acetyl formyl anhydride (prepared by stirring 2.0 equiv of acetic anhydride and 2.0 equiv of formic acid for 2 h at 55 °C) was added dropwise to a solution of (*E*)-methyl 3-(2-aminophenoxy)acrylate (3.32 g, 17.2 mmol, 1.0 equiv) in Et<sub>2</sub>O at 0 °C, and the mixture was stirred for 0.5h at 0 °C, and then filtered to give (*E*)-methyl 3-(2-formamidophenoxy)acrylate (3.42 g, 90%) as a white solid.

**Step 3:** A solution of (*E*)-methyl 3-(2-formamidophenoxy)acrylate (3.42 g, 15.48 mmol, 1.0 equiv) and NEt<sub>3</sub> (69.66 mmol, 4.5 equiv) in THF (100 mL) was cooled at 0 °C, then POCl<sub>3</sub> (23.22 mmol, 1.5 equiv) was added dropwise. After the reaction was completed, a saturated Na<sub>2</sub>CO<sub>3</sub> aqueous solution was added at 0 °C and the mixture was extracted with EA (3 ×100 mL). The combined organic phases were dried over anhydrous Na<sub>2</sub>SO<sub>4</sub>, filtered, and concentrated in vacuo. The residue was subjected to column chromatography on neutral Al<sub>2</sub>O<sub>3</sub> to give (*E*)-methyl 3-(2-isocyanophenoxy)acrylate (**1a**, 2.60 g, 83%) as a white solid.<sup>4,5</sup>

## Representative procedure for the preparation of 1-(allyloxy)-2-isocyanobenzene

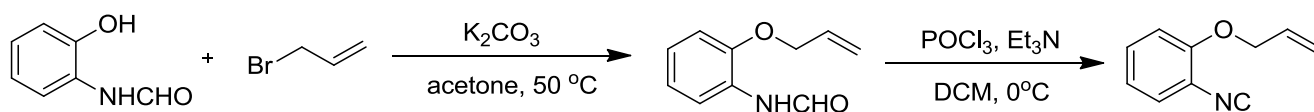

To a solution of phenols N-(2-hydroxyphenyl)formamide (10 mmol, 1.0 equiv) and potassium carbonate (20 mmol, 2.0 equiv) in acetone (30 ml) was added allyl bromide (24 mmol, 1.2 equiv). The resulting mixture was then stirred at 50 °C for 12 hours. After filtration through celite and washed with ethyl acetate, the solvent was removed under reduced pressure and the residue was chromatographed on silica gel to afford the product N-(2-(allyloxy)phenyl)-formamide (1.51g, 85%) as yellow oil.<sup>6,7</sup>

A solution of N-(2-(allyloxy)phenyl)formamide (1.51 g, 8.5 mmol, 1.0 equiv) and NEt<sub>3</sub> (38.25 mmol, 4.5 equiv) in DCM (50 mL) was cooled at 0 °C, then POCl<sub>3</sub> (12.75 mmol, 1.5 equiv) was added dropwise. After the reaction was completed, a saturated Na<sub>2</sub>CO<sub>3</sub> aqueous solution was added at 0 °C and the mixture was extracted with EA (3 ×50 mL). The combined organic phases were dried over anhydrous Na<sub>2</sub>SO<sub>4</sub>, filtered, and concentrated in vacuo. The residue was subjected to column chromatography on neutral Al<sub>2</sub>O<sub>3</sub> to give 1-(allyloxy)-2-isocyanobenzene (0.95 g, 70%) as a yellow liquid.

## Analytical Data of Substrate 1

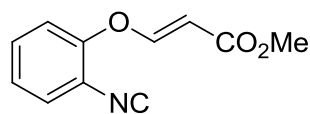

(**1a**): 2.60 g, 64% yield, white solid: m.p. 62-63°C.  $^1\text{H}$  NMR (500 MHz,  $\text{CDCl}_3$ ):  $\delta$  (ppm) = 7.75 (d,  $J$  = 12.0 Hz, 1H), 7.45-7.41 (m, 2H), 7.22 (dd,  $J$  = 8.0, 1.5 Hz, 1H), 7.17-7.15 (m, 1H), 5.63 (d,  $J$  = 12.0 Hz, 1H), 3.74 (s, 3H).  $^{13}\text{C}$  NMR (125 MHz,  $\text{CDCl}_3$ ):  $\delta$  (ppm) = 170.0, 167.0, 157.5, 150.8, 130.9, 128.4, 125.6, 118.8, 118.4, 103.9, 51.65. HRMS (ESI): calcd. for  $\text{C}_{11}\text{H}_{10}\text{NO}_3$   $[\text{M}+\text{H}]^+$  204.0661, Found: 204.0670.

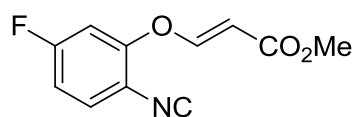

(**1b**): 0.91g, 41% yield, white solid: m.p. 117-118°C.  $^1\text{H}$  NMR (500 MHz,  $\text{CDCl}_3$ ):  $\delta$  (ppm) = 7.70 (d,  $J$  = 12.0 Hz, 1H), 7.45-7.42 (m, 1H), 6.95-6.90 (m, 2H), 5.72 (d,  $J$  = 12.0 Hz, 1H), 3.75 (s, 3H).  $^{13}\text{C}$  NMR (125 MHz,  $\text{CDCl}_3$ ):  $\delta$  (ppm) = 170.1, 166.6, 162.7 (d,  $^1J_{\text{C-F}}$  = 252.5 Hz), 156.3, 151.9 (d,  $^3J_{\text{C-F}}$  = 10.0 Hz), 129.5 (d,  $^3J_{\text{C-F}}$  = 10.0 Hz), 114.6, 112.6 (d,  $^2J_{\text{C-F}}$  = 47.5 Hz), 106.5 (d,  $^2J_{\text{C-F}}$  = 52.5 Hz), 105.2, 51.8. HRMS (ESI): calcd. for  $\text{C}_{22}\text{H}_{17}\text{F}_2\text{N}_2\text{O}_6$   $[2\text{M}+\text{H}]^+$  443.1055, Found: 443.1050.

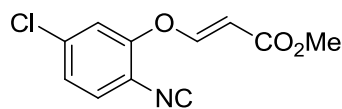

(**1c**): 1.19 g, 50% yield, white solid: m.p. 92-93°C.  $^1\text{H}$  NMR (500 MHz,  $\text{CDCl}_3$ ):  $\delta$  (ppm) = 7.70 (d,  $J$  = 12.0 Hz, 1H), 7.38 (d,  $J$  = 8.5 Hz, 1H), 7.20-7.17 (m, 2H), 5.71 (d,  $J$  = 12.0 Hz, 1H), 3.75 (s, 3H).  $^{13}\text{C}$  NMR (125 MHz,  $\text{CDCl}_3$ ):  $\delta$  (ppm) = 171.3, 166.6, 156.4, 151.2, 136.5, 129.0, 125.7, 119.0, 116.8, 105.1, 51.8. HRMS (ESI): calcd. for  $\text{C}_{22}\text{H}_{17}\text{Cl}_2\text{N}_2\text{O}_6$   $[2\text{M}+\text{H}]^+$  475.0464, Found: 475.0450.

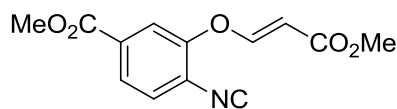

(**1d**): 1.28 g, 49% yield, white solid: m.p. 95-96°C.  $^1\text{H}$  NMR (500 MHz,  $\text{CDCl}_3$ ):  $\delta$  (ppm) = 7.88 (d,  $J$  = 8.0 Hz, 1H), 7.82 (s, 1H), 7.77 (d,  $J$  = 12.5 Hz, 1H), 7.50 (d,  $J$  = 8.0 Hz, 1H), 5.72 (d,  $J$  = 12.0 Hz, 1H), 3.94 (s, 3H), 3.75 (s, 3H).  $^{13}\text{C}$  NMR (125 MHz,  $\text{CDCl}_3$ ):  $\delta$  (ppm) = 172.8, 166.7, 164.8, 156.5, 150.7, 132.6, 128.4, 126.4, 121.4, 119.1, 105.0, 53.0, 51.8. HRMS (ESI): calcd. for  $\text{C}_{13}\text{H}_{12}\text{NO}_5$   $[\text{M}+\text{H}]^+$  262.0715, Found: 262.0712.

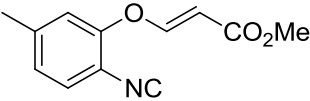
**(1e)**: 1.22 g, 56% yield, white solid: m.p. 75-76°C. <sup>1</sup>H NMR (500 MHz, CDCl<sub>3</sub>): δ (ppm) = 7.73 (d, *J* = 12.0 Hz, 1H), 7.30 (d, *J* = 8.0 Hz, 1H), 7.00 (d, *J* = 8.5 Hz, 1H), 6.95 (s, 1H), 3.74 (s, 3H), 2.38 (s, 3H). <sup>13</sup>C NMR (125 MHz, CDCl<sub>3</sub>): δ (ppm) = 169.1, 167.1, 157.7, 150.5, 142.0, 127.9, 126.2, 119.3, 103.6, 51.6, 21.6. HRMS (ESI): calcd. for C<sub>12</sub>H<sub>12</sub>NO<sub>3</sub> [M+H]<sup>+</sup> 218.0817, Found: 218.0825.

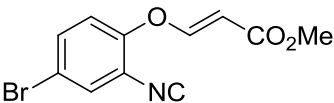
**(1f)**: 1.52 g, 54% yield, red solid: m.p. 89-90°C. <sup>1</sup>H NMR (500 MHz, CDCl<sub>3</sub>): δ (ppm) = 7.69 (d, *J* = 12.0 Hz, 1H), 7.58 (d, *J* = 2.0 Hz, 1H), 7.54 (dd, *J* = 9.0, 2.5 Hz, 1H), 7.05 (d, *J* = 9.0 Hz, 1H), 5.66 (d, *J* = 12.0 Hz, 1H), 3.74 (s, 3H). <sup>13</sup>C NMR (125 MHz, CDCl<sub>3</sub>): δ (ppm) = 171.8, 166.7, 156.8, 150.0, 134.0, 131.1, 120.0, 119.3, 117.6, 104.6, 51.8. HRMS (ESI): calcd. for C<sub>11</sub>H<sub>9</sub>BrNO<sub>3</sub> [M+H]<sup>+</sup> 281.9766, Found: 281.9760.

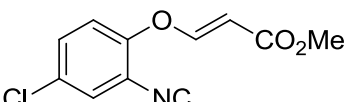
**(1g)**: 1.23g, 52% yield, white solid: m.p. 86-87°C. <sup>1</sup>H NMR (500 MHz, CDCl<sub>3</sub>): δ (ppm) = 7.70 (d, *J* = 12.0 Hz, 1H), 7.43 (d, *J* = 2.5 Hz, 1H), 7.40 (dd, *J* = 9.0, 2.5 Hz, 1H), 7.11 (d, *J* = 8.5 Hz, 1H), 5.65 (d, *J* = 12.0 Hz, 1H), 3.74 (s, 3H). <sup>13</sup>C NMR (125 MHz, CDCl<sub>3</sub>): δ (ppm) = 171.8, 166.7, 157.0, 149.5, 131.0, 130.7, 128.2, 119.8, 119.0, 104.5, 51.7. HRMS (ESI): calcd. for C<sub>11</sub>H<sub>9</sub>ClNO<sub>3</sub> [M+H]<sup>+</sup> 238.0271, Found: 238.0280.

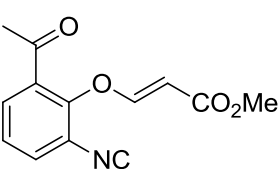
**(1h)**: 1.44 g, 59% yield, yellow solid: m.p. 76-78°C. <sup>1</sup>H NMR (500 MHz, CDCl<sub>3</sub>): δ (ppm) = 7.84 (d, *J* = 7.5 Hz, 1H), 7.70 (d, *J* = 12.5 Hz, 1H), 7.62 (d, *J* = 8.0 Hz, 1H), 7.40-7.37 (m, 1H), 5.28 (d, *J* = 12.5 Hz, 1H), 3.71 (s, 3H), 2.58 (s, 3H). <sup>13</sup>C NMR (125 MHz, CDCl<sub>3</sub>): δ (ppm) = 195.8, 172.1, 166.4, 159.2, 148.8, 133.2, 131.8, 131.4, 127.1, 121.1, 102.5, 51.7, 30.8. HRMS (ESI): calcd. for C<sub>26</sub>H<sub>23</sub>N<sub>2</sub>O<sub>8</sub> [2M+H]<sup>+</sup> 491.1454, Found: 491.1449.

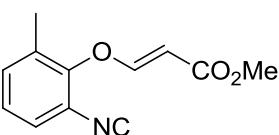
**(1i)**: 0.87g, 40% yield, yellow solid: m.p. 50-51°C. <sup>1</sup>H NMR (500 MHz, CDCl<sub>3</sub>): δ (ppm) = 7.73 (d, *J* = 12.5 Hz, 1H), 7.29 (d, *J* = 7.0 Hz, 2H), 7.18 (t, *J* = 7.5 Hz,

1H), 5.11 (d,  $J = 12.5$  Hz, 1H), 3.70 (s, 3H), 2.24 (s, 3H).  $^{13}\text{C}$  NMR (125 MHz,  $\text{CDCl}_3$ ):  $\delta$  (ppm) = 169.8, 167.0, 159.4, 147.9, 132.6, 132.5, 126.6, 125.8, 120.2, 100.5, 51.5, 16.0. HRMS (ESI): calcd. for  $\text{C}_{24}\text{H}_{23}\text{N}_2\text{O}_6$   $[2\text{M}+\text{H}]^+$  435.1556, Found: 435.1552.

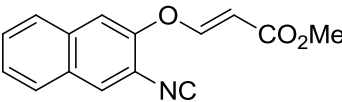 (**1j**): 1.57g, 62% yield, white solid: m.p. 90-91°C.  $^1\text{H}$  NMR (500 MHz,  $\text{CDCl}_3$ ):  $\delta$  (ppm) = 7.93 (s, 1H), 7.87 (d,  $J = 12.5$  Hz, 1H), 7.80 (t,  $J = 8.5$  Hz, 1H), 7.59 (t,  $J = 7.0$  Hz, 1H), 7.54 (t,  $J = 7.0$  Hz, 1H), 7.50 (s, 1H), 5.74 (d,  $J = 12.0$  Hz, 1H), 3.77 (s, 3H).  $^{13}\text{C}$  NMR (125 MHz,  $\text{CDCl}_3$ ):  $\delta$  (ppm) = 169.8, 167.1, 157.6, 147.5, 133.3, 129.8, 128.9, 128.2, 127.9, 127.5, 127.1, 117.3, 115.0, 104.3, 51.7. HRMS (ESI): calcd. for  $\text{C}_{15}\text{H}_{12}\text{NO}_3$   $[\text{M}+\text{H}]^+$  254.0817, Found: 254.0813.

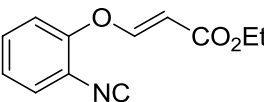 (**1k**): 1.32 g, 61% yield, yellow solid: m.p. 59-60°C.  $^1\text{H}$  NMR (500 MHz,  $\text{CDCl}_3$ ):  $\delta$  (ppm) = 7.74 (d,  $J = 12.0$  Hz, 1H), 7.44-7.41 (m, 1H), 7.21 (td,  $J = 7.5, 1.0$  Hz, 1H), 7.17 (dd,  $J = 9.0, 1.0$  Hz, 1H), 5.61 (d,  $J = 12.0$  Hz, 1H), 4.20 (q,  $J = 7.5$  Hz, 2H), 1.28 (t,  $J = 7.5$  Hz, 3H).  $^{13}\text{C}$  NMR (125 MHz,  $\text{CDCl}_3$ ):  $\delta$  (ppm) = 169.9, 166.6, 157.4, 150.8, 130.9, 128.4, 125.6, 118.9, 118.4, 104.2, 60.5, 14.4. HRMS (ESI): calcd. for  $\text{C}_{24}\text{H}_{23}\text{N}_2\text{O}_6$   $[2\text{M}+\text{H}]^+$  435.1556, Found: 435.1552.

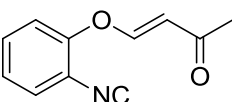 (**1l**): 1.03 g, 55% yield, brown solid: m.p. 66-67°C.  $^1\text{H}$  NMR (500 MHz,  $\text{CDCl}_3$ ):  $\delta$  (ppm) = 7.68 (d,  $J = 12.0$  Hz, 1H), 7.45-7.41 (m, 2H), 7.23 (td,  $J = 8.0, 1.5$  Hz, 1H), 7.16 (dd,  $J = 8.5$  Hz, 1.0 Hz, 1H), 5.94 (d,  $J = 12.5$  Hz, 1H), 2.24 (s, 3H).  $^{13}\text{C}$  NMR (125 MHz,  $\text{CDCl}_3$ ):  $\delta$  (ppm) = 196.9, 170.0, 157.2, 150.6, 130.9, 128.4, 125.8, 119.0, 118.5, 112.9, 28.8. HRMS (ESI): calcd. for  $\text{C}_{22}\text{H}_{19}\text{N}_2\text{O}_4$   $[2\text{M}+\text{H}]^+$  375.1345, Found: 375.1337.

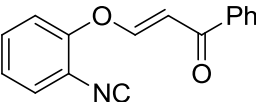 (**1m**): 0.50 g, 20% yield, yellow solid: m.p. 65-66°C.  $^1\text{H}$  NMR (500 MHz,  $\text{CDCl}_3$ ):  $\delta$  (ppm) = 7.95-7.90 (m, 3H), 7.58 (tt,  $J = 7.0, 1.5$  Hz, 1H), 7.50-7.44 (m, 4H), 7.25-7.21 (m, 2H), 6.87 (d,  $J = 11.5$  Hz, 1H).  $^{13}\text{C}$  NMR (125 MHz,  $\text{CDCl}_3$ ):  $\delta$  (ppm) = 190.0, 170.0,

158.0, 151.2, 138.0, 133.1, 131.0, 128.8, 128.4, 128.3, 125.5, 118.2, 108.7. HRMS (ESI): calcd. For  $C_{16}H_{12}NO_2$   $[M+H]^+$  250.0868, Found: 250.0875.

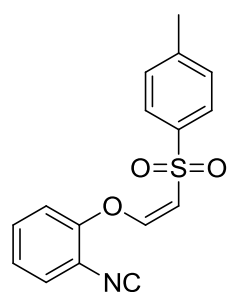

(**1n**): 0.30 g, 10% yield, brown solid: m.p. 72-73°C.  $^1H$  NMR (500 MHz,  $CDCl_3$ ):  $\delta$  (ppm) = 8.02 (d,  $J$  = 8.5 Hz, 1H), 7.43-7.39 (m, 2H), 7.37 (d,  $J$  = 8.0 Hz, 2H), 7.21 (td,  $J$  = 7.5, 1.0 Hz, 1H), 7.08 (dd,  $J$  = 8.5, 1.0 Hz, 1H), 6.76 (d,  $J$  = 6.5 Hz, 1H), 6.02 (d,  $J$  = 6.5 Hz, 1H).  $^{13}C$  NMR (125 MHz,  $CDCl_3$ ):  $\delta$  (ppm) = 170.7, 151.3, 149.3, 144.7, 138.9, 131.0, 130.0, 128.6, 128.0, 125.8, 118.1, 115.6, 21.8. HRMS (ESI): calcd. For

$C_{16}H_{14}NO_3S$   $[M+H]^+$  300.0694, Found: 300.0688.

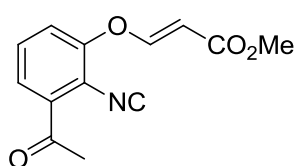

(**1o**): 0.93 g, 38% yield, white solid: m.p. 118-119°C.  $^1H$  NMR (500 MHz,  $CDCl_3$ ):  $\delta$  (ppm) = 7.74 (d,  $J$  = 12.0 Hz, 1H), 7.58 (d,  $J$  = 7.5 Hz, 1H), 7.51 (t,  $J$  = 8.0 Hz, 1H), 7.34 (d,  $J$  = 8.0 Hz, 1H), 5.68 (d,  $J$  = 12.0 Hz, 1H), 3.74 (s, 3H),

2.71 (s, 3H).  $^{13}C$  NMR (125 MHz,  $CDCl_3$ ):  $\delta$  (ppm) = 196.3, 176.4, 166.8, 157.0, 151.9, 137.3, 130.4, 125.4, 121.6, 116.0, 104.6, 51.8, 29.9. HRMS (ESI): calcd. for  $C_{13}H_{12}NO_4$   $[M+H]^+$  246.0766, Found: 246.0762.

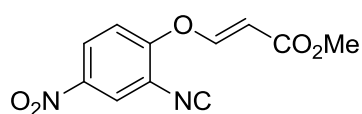

(**1p**): 0.92 g, 37% yield, yellow solid: m.p. 145-147°C.  $^1H$  NMR (500 MHz,  $CDCl_3$ ):  $\delta$  (ppm) = 8.34 (m, 1H), 7.78 (d,  $J$  = 12.0 Hz, 1H), 7.33 (d,  $J$  = 8.5

Hz, 1H), 5.93 (d,  $J$  = 12.5 Hz, 1H), 3.78 (s, 3H).  $^{13}C$  NMR (125 MHz,  $CDCl_3$ ):  $\delta$  (ppm) = 173.5, 168.2, 155.2, 154.4, 143.7, 126.3, 124.2, 117.1, 107.6, 52.0. HRMS (ESI): calcd. for  $C_{11}H_9N_2O_5$   $[M+H]^+$  249.0511, Found: 249.0517.

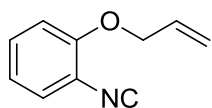

(**1q**): 0.95 g, 60% yield, yellow liquid.  $^1H$  NMR (500 MHz,  $CDCl_3$ ):  $\delta$  (ppm) = 7.35-7.26 (m, 2H), 6.95-6.91 (m, 2H), 6.09-6.02 (m, 1H), 5.49 (dq,  $J$  = 17.0, 1.5 Hz, 1H),

5.33 (dq,  $J$  = 10.5, 1.5 Hz, 1H), 4.64 (dt,  $J$  = 5.0, 1.5 Hz, 1H).  $^{13}C$  NMR (125 MHz,  $CDCl_3$ ):  $\delta$  (ppm) =

167.6, 154.1, 132.2, 130.4, 127.8, 120.8, 118.2, 116.7, 113.3, 69.6. HRMS (ESI): calcd. for  $C_{10}H_{10}NO$   $[M+H]^+$  160.0762, Found: 160.0766.

### 3 General procedure

#### 3.1 General Procedure for the Formation of Product **3** or **4**.

To a Schlenk tube containing isocyanide **1** (0.5 mmol), CsF (2.0 mol %) was added  $CH_3CN$  (5.0 mL) and the reaction mixture was stirred for 5 minutes at room temperature, followed by the addition of benzyne precursor **2** (0.75 mmol) at the same temperature. The Schlenk tube was then placed in a preheated (80°C) oil bath. The progress of the reaction was monitored by TLC. After completion of the reaction,  $CH_3CN$  was evaporated on a rotary evaporator. The crude products obtained were purified by flash silica gel column chromatography using a gradient of ethyl acetate:petroleum ether to afford the corresponding products **3** or **4**.

#### 3.2 General Procedure for the Formation of Product **6**

Into a flame-dried 25 mL Schlenk tube were added **3** (0.2 mmol, 1.0 equiv),  $[Cp^*RhCl_2]_2$  (3 mg, 2.5 mol %), NaOAc (16 mg, 1 equiv), and  $Cu(OAc)_2$  (64 mg, 2.0 equiv) under nitrogen flow, the tube was sealed with rubber, evacuated, and refilled with nitrogen three times, and then DCE (2 mL) and alkenes were added via syringe. The tube was sealed with a glass stopper, evacuated, and refilled with nitrogen three times and heated at 90 °C for the duration of the reaction. After being cooled to room temperature, the reaction mixture was quenched with 10 mL of saturated ammonium chloride solution and extracted with ethyl acetate (3 × 10 mL), the organic phase was combined, washed with brine (2 × 10 mL), dried under anhydrous  $MgSO_4$ , and concentrated under reduced pressure, and the residue mixture was purified by flash column chromatography.<sup>8,9</sup>

#### 3.3 General Procedure for the Formation of Product **8**

Under  $N_2$  atmosphere,  $AlMe_3$  (0.3 mL, 1M in hexane) was added to the solution of **3a** (55.8 mg, 0.2 mmol) and 4-methoxyaniline (73.8 mg, 0.6 mmol) in toluene (2 mL). The resulting

solution was heated under reflux for 24 h. After completion of the reaction, a saturated  $\text{NH}_4\text{Cl}$  aqueous solution was added, and the mixture was extracted with EA ( $3 \times 10$  mL). The combined organic phases were dried over anhydrous  $\text{Na}_2\text{SO}_4$ , filtered, and concentrated in vacuo. The residue was purified by flash chromatography on silica gel (eluant: petroleum ether/ethyl acetate = 1:1) to give the desired product **10** (56mg, 70%) as a white solid.

## References:

1. Y. Himeshima, T. Sonoda, H. Kobayashi, *Chem. Lett.*, **1983**, 1211.
2. D. Pe ña, A. Cobas, D. Pérez, E. Guiti án, *Synthesis*, **2002**, 1454.
3. E. Ciganek, *Synthesis*, **1995**, 1311.
4. M. Tobisu, H. Fujihara, K. Koh, N. Chatani, *J. Org. Chem.* **2010**, 75, 4841.
5. Z. Hu, H. Yuan, Y. Men, Q. Liu, J. Zhang, X. Xu, *Angew. Chem. Int. Ed.* **2016**, 55, 7077.
6. J. F. M. Hewitt, L. Williams, P. Aggarwal, C. D. Smith, D. J. France, *Chem. Sci.* **2013**, 4, 3538.
7. W. Chen, X.-D. Yang, Y. Li, L.-J. Yang, X.-Q. Wang, G.-L. Zhang, H.-B. Zhang, *Org. Biomol. Chem.* **2011**, 9, 4250.
8. Y. Matsuura, M. Tamura, T. Kochi, M. Sato, N. Chatani and F. Kakiuchi, *J. Am. Chem. Soc.*, **2007**, 129, 9858.
9. Q. Zhou, J.-F. Zhang, H. Cao, R. Zhong and X.-F. Hou, *J. Org. Chem.*, **2016**, 81, 12169.

## 4 Characterization Data

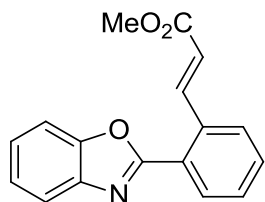

(**3a**): 99 mg, 71% yield, white solid: m.p. 90-91°C. <sup>1</sup>H NMR (500 MHz, CDCl<sub>3</sub>):

δ (ppm) = 8.83 (d, *J* = 16.0 Hz, 1H), 8.21-8.20 (m, 1H), 7.86-7.84 (m, 1H), 7.75-7.73 (m, 1H), 7.62-7.60 (m, 1H), 7.54-7.52 (m, 2H), 7.40-7.36 (m, 2H), 6.48 (d, *J* = 16.0 Hz, 1H), 3.84 (s, 3H). <sup>13</sup>C NMR (125 MHz, CDCl<sub>3</sub>): δ (ppm) = 167.3,

161.9, 150.6, 143.9, 142.2, 135.1, 131.3, 130.4, 129.9, 128.1, 126.6, 125.6, 124.8, 120.9, 120.8, 110.7, 51.92. HRMS (ESI): calcd. for C<sub>17</sub>H<sub>14</sub>NO<sub>3</sub> [M+H]<sup>+</sup> 280.0974, Found: 280.0960.

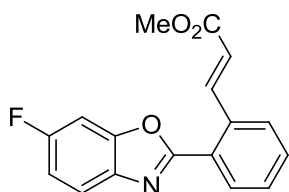

(**3b**): 98 mg, 66% yield, white solid: m.p. 95-97°C. <sup>1</sup>H NMR (500 MHz, CDCl<sub>3</sub>):

δ (ppm) = 8.80 (d, *J* = 16.0 Hz, 1H), 8.19-8.15 (m, 1H), 7.78-7.76 (m, 1H), 7.74-7.72 (m, 1H), 7.56-7.51 (m, 2H), 7.33 (dd, *J* = 8.0, 2.5 Hz, 1H), 7.15-7.11 (m,

1H), 6.47 (d, *J* = 16.0 Hz, 1H), 3.84 (s, 3H). <sup>13</sup>C NMR (125 MHz, CDCl<sub>3</sub>): δ (ppm) = 167.3, 162.5 (d, <sup>4</sup>*J*<sub>C-F</sub> = 3.8 Hz), 161.0 (d, <sup>1</sup>*J*<sub>C-F</sub> = 243.8 Hz), 150.6 (d, <sup>3</sup>*J*<sub>C-F</sub> = 15.0 Hz), 143.8, 138.5 (d, <sup>5</sup>*J*<sub>C-F</sub> = 1.3 Hz), 135.0, 131.4, 130.1 (d, <sup>2</sup>*J*<sub>C-F</sub> = 28.8 Hz), 128.1, 126.2, 121.1 (d, <sup>3</sup>*J*<sub>C-F</sub> = 11.3 Hz), 121.0, 112.9 (d, <sup>4</sup>*J*<sub>C-F</sub> = 5.0 Hz), 98.8 (d, <sup>2</sup>*J*<sub>C-F</sub> = 27.5 Hz), 51.96. HRMS (ESI): calcd. for C<sub>17</sub>H<sub>13</sub>FNO<sub>3</sub> [M+H]<sup>+</sup> 298.0879, Found: 298.0874.

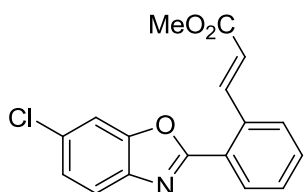

(**3c**): 100 mg, 64% yield, white solid: m.p. 112-113°C. <sup>1</sup>H NMR (500 MHz,

CDCl<sub>3</sub>): δ (ppm) = 8.80 (d, *J* = 16.0 Hz, 1H), 8.19-8.17 (m, 1H), 7.78-7.76 (m, 1H), 7.75-7.72 (m, 2H), 7.61 (d, *J* = 2.0 Hz, 1H), 7.57-7.51 (m, 2H), 7.35 (dd, *J*

= 8.5, 2.0 Hz, 1H), 7.15-7.11 (m, 1H), 6.47 (d, *J* = 16.0 Hz, 1H), 3.84 (s, 3H). <sup>13</sup>C NMR (125 MHz, CDCl<sub>3</sub>): δ (ppm) = 167.2, 162.5, 150.8, 143.7, 141.0, 135.2, 131.6, 131.3, 130.3, 130.0, 128.2, 126.00, 125.5, 121.2, 121.1, 111.4, 52.0. HRMS (ESI): calcd. for C<sub>17</sub>H<sub>13</sub>ClNO<sub>3</sub> [M+H]<sup>+</sup> 314.0584, Found: 314.0573.

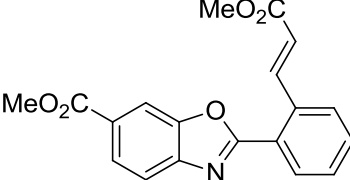
**(3d)**: 135 mg, 80% yield, white solid: m.p. 148-149°C. <sup>1</sup>H NMR (500 MHz, CDCl<sub>3</sub>): δ (ppm) = 8.82 (d, *J* = 16.0 Hz, 1H), 8.28 (d, *J* = 1.0 Hz, 1H), 8.24-8.22 (m, 1H), 8.10 (dd, *J* = 8.5, 2.0 Hz, 1H), 7.85 (d, *J* = 8.0 Hz, 1H). <sup>13</sup>C NMR (125 MHz, CDCl<sub>3</sub>): δ (ppm) = 167.2, 166.7, 164.4, 150.2, 146.0, 143.7, 135.5, 131.9, 130.6, 130.0, 128.3, 127.6, 126.5, 125.8, 121.2, 120.3, 112.5, 52.5, 52.0. HRMS (ESI): calcd. for C<sub>19</sub>H<sub>16</sub>NO<sub>5</sub> [M+H]<sup>+</sup> 338.1028, Found: 338.1023.

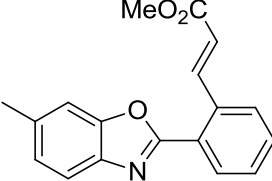
**(3e)**: 69 mg, 47% yield, white solid: m.p. 115-117°C. <sup>1</sup>H NMR (500 MHz, CDCl<sub>3</sub>): δ (ppm) = 8.82 (d, *J* = 16.0 Hz, 1H), 8.19-8.16 (m, 1H), 7.73-7.69 (m, 2H), 7.53-7.49 (m, 2H), 7.40 (s, 1H), 7.18 (dd, *J* = 7.5, 1.0 Hz, 1H), 6.47 (d, *J* = 16.0 Hz, 1H), 3.84 (s, 3H), 2.50 (s, 3H). <sup>13</sup>C NMR (125 MHz, CDCl<sub>3</sub>): δ (ppm) = 167.3, 161.4, 150.9, 144.0, 140.0, 136.1, 134.9, 131.1, 130.2, 129.9, 128.00, 126.7, 126.0, 120.7, 120.0, 110.9, 51.9, 21.9. HRMS (ESI): calcd. for C<sub>18</sub>H<sub>16</sub>NO<sub>3</sub> [M+H]<sup>+</sup> 294.1130, Found: 294.1126.

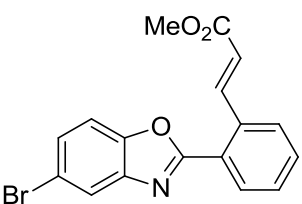
**(3f)**: 120 mg, 67% yield, white solid: m.p. 118-120°C. <sup>1</sup>H NMR (500 MHz, CDCl<sub>3</sub>): δ (ppm) = 8.78 (d, *J* = 16.0 Hz, 1H), 8.20-8.18 (m, 1H), 7.99-7.98 (m, 1H), 7.74 (dd, *J* = 7.0, 2.0 Hz, 1H), 7.58-7.52 (m, 2H), 7.51-7.47 (m, 2H), 6.47 (d, *J* = 16.0 Hz, 1H), 3.85 (s, 3H). <sup>13</sup>C NMR (125 MHz, CDCl<sub>3</sub>): δ (ppm) = 167.2, 163.1, 149.6, 143.8, 143.7, 135.3, 131.7, 130.4, 130.0, 128.7, 128.2, 126.0, 123.7, 121.1, 117.5, 112.00, 52.0. HRMS (ESI): calcd. for C<sub>17</sub>H<sub>13</sub>BrNO<sub>3</sub> [M+H]<sup>+</sup> 358.0079, Found: 358.0072.

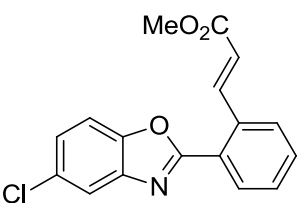
**(3g)**: 108 mg, 69% yield, white solid: m.p. 122-124°C. <sup>1</sup>H NMR (500 MHz, CDCl<sub>3</sub>): δ (ppm) = 8.79 (d, *J* = 16.0 Hz, 1H), 8.20-8.18 (m, 1H), 7.83 (d, *J* = 2.0 Hz, 1H), 7.74 (dd, *J* = 7.0, 2.0 Hz, 1H), 7.58-7.51 (m, 3H), 7.36 (dd, *J* = 9.0, 2.0 Hz, 1H), 6.47 (d, *J* = 16.0 Hz, 1H), 3.85 (s, 3H). <sup>13</sup>C NMR (125 MHz, CDCl<sub>3</sub>):

$\delta$  (ppm) = 167.2, 163.3, 149.2, 143.7, 143.3, 135.3, 131.7, 130.4, 130.3, 130.0, 128.2, 126.0, 126.0, 121.2, 120.7, 111.5, 52.0. HRMS (ESI): calcd. for  $C_{17}H_{13}ClNO_3$   $[M+H]^+$  314.0584, Found: 314.0573.

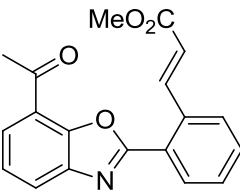 (**3h**): 136 mg, 85% yield, white solid: m.p. 138-140°C.  $^1H$  NMR (500 MHz,  $CDCl_3$ ):  $\delta$  (ppm) = 8.77 (d,  $J$  = 16.0 Hz, 1H), 8.27-8.26 (m, 1H), 8.02 (d,  $J$  = 8.0 Hz, 1H), 7.98 (dd,  $J$  = 7.5, 0.5 Hz, 1H), 7.75-7.73 (m, 1H), 7.59-7.54 (m, 1H), 7.46 (t,  $J$  = 8.0 Hz, 2H), 6.48 (d,  $J$  = 16.0 Hz, 1H), 3.83 (s, 3H), 2.88 (s, 3H).  $^{13}C$  NMR (125 MHz,  $CDCl_3$ ):  $\delta$  (ppm) = 194.7, 167.0, 162.5, 149.3, 143.5, 143.3, 135.1, 131.8, 130.6, 130.1, 128.3, 126.1, 125.7, 125.7, 124.8, 121.9, 121.3, 51.92, 30.54. HRMS (ESI): calcd. for  $C_{19}H_{16}NO_4$   $[M+H]^+$  322.1079, Found: 322.1007.

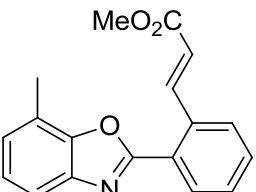 (**3i**): 76 mg, 52% yield, white solid: m.p. 95-96°C.  $^1H$  NMR (500 MHz,  $CDCl_3$ ):  $\delta$  (ppm) = 8.83 (d,  $J$  = 16.0 Hz, 1H), 8.27-8.25 (m, 1H), 7.74-7.72 (m, 1H), 7.66 (d,  $J$  = 8.0 Hz, 1H), 7.55-7.53 (m, 2H), 7.28 (d,  $J$  = 8.0 Hz, 1H), 7.18 (d,  $J$  = 7.0 Hz, 1H), 6.47 (d,  $J$  = 16.0 Hz, 1H), 3.84 (s, 3H), 2.60 (s, 3H).  $^{13}C$  NMR (125 MHz,  $CDCl_3$ ):  $\delta$  (ppm) = 167.3, 161.8, 150.0, 144.0, 141.6, 135.0, 131.3, 130.4, 129.9, 128.1, 126.7, 126.6, 124.8, 121.4, 120.9, 118.0, 51.9, 15.3. HRMS (ESI): calcd. for  $C_{18}H_{16}NO_3$   $[M+H]^+$  294.1130, Found: 294.1121.

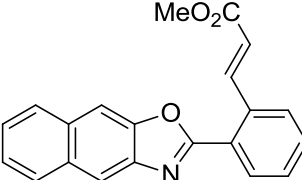 (**3j**): 118 mg, 72% yield, white solid: m.p. 171-172°C.  $^1H$  NMR (500 MHz,  $CDCl_3$ ):  $\delta$  (ppm) = 8.93 (d,  $J$  = 16.0 Hz, 1H), 8.29-8.27 (m, 1H), 8.00 (d,  $J$  = 7.5 Hz, 1H), 7.94 (d,  $J$  = 7.5 Hz, 1H), 7.75-7.73 (m, 1H), 7.57-7.52 (m, 2H), 7.51-7.46 (m, 2H), 6.49 (d,  $J$  = 16.0 Hz, 1H), 3.87 (s, 3H).  $^{13}C$  NMR (125 MHz,  $CDCl_3$ ):  $\delta$  (ppm) = 167.3, 163.8, 149.3, 143.9, 142.0, 135.6, 132.0, 131.7, 131.6, 130.6, 129.9, 128.7, 128.2, 128.0, 126.2, 125.7, 124.8, 121.0, 118.2, 106.5, 51.9. HRMS (ESI): calcd. for  $C_{21}H_{16}NO_3$   $[M+H]^+$  330.1130, Found: 330.1127.

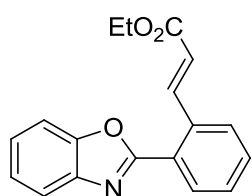

**(3k)**: 98 mg, 67% yield, yellow viscous liquid.  $^1\text{H}$  NMR (500 MHz,  $\text{CDCl}_3$ ):  $\delta$  (ppm) = 8.84 (d,  $J$  = 16.0 Hz, 1H), 8.23-8.20 (m, 1H), 7.86-7.83 (m, 1H), 7.77-7.74 (m, 1H), 7.63-7.60 (m, 1H), 7.57-7.52 (m, 2H), 7.41-7.36 (m, 2H), 6.48 (d,  $J$  = 16.0 Hz, 1H), 4.30 (q,  $J$  = 7.0 Hz, 2H), 1.36 (t,  $J$  = 7.0 Hz, 3H).  $^{13}\text{C}$  NMR (125 MHz,  $\text{CDCl}_3$ ):  $\delta$  (ppm) = 166.9, 162.0, 150.7, 143.6, 142.2, 135.2, 131.3, 130.4, 129.9, 128.1, 126.6, 125.6, 124.8, 121.4, 120.8, 110.8, 60.7, 14.5. HRMS (ESI): calcd. for  $\text{C}_{18}\text{H}_{16}\text{NO}_3$   $[\text{M}+\text{H}]^+$  294.1130, Found: 294.1123.

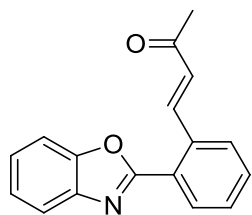

**(3l)**: 95 mg, 72% yield, white solid: m.p. 103-105°C.  $^1\text{H}$  NMR (500 MHz,  $\text{CDCl}_3$ ):  $\delta$  (ppm) = 8.83 (d,  $J$  = 16.0 Hz, 1H), 8.25-8.22 (m, 1H), 7.83-7.80 (m, 1H), 7.77-7.73 (m, 1H), 7.63-7.59 (m, 1H), 7.56-7.53 (m, 2H), 7.42-7.37 (m, 2H), 6.67 (d,  $J$  = 16.0 Hz, 1H), 2.49 (s, 3H).  $^{13}\text{C}$  NMR (125 MHz,  $\text{CDCl}_3$ ):  $\delta$  (ppm) = 199.3, 161.9, 150.5, 143.2, 142.2, 135.2, 131.4, 130.4, 130.3, 130.1, 128.0, 126.4, 125.8, 124.9, 120.6, 110.7, 27.0. HRMS (ESI): calcd. for  $\text{C}_{17}\text{H}_{14}\text{NO}_2$   $[\text{M}+\text{H}]^+$  264.1025, Found: 264.1018.

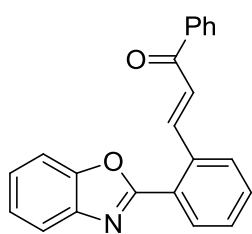

**(3m)**: 102 mg, 63% yield, yellow solid: m.p. 86-87°C.  $^1\text{H}$  NMR (500 MHz,  $\text{CDCl}_3$ ):  $\delta$  (ppm) = 8.85 (d,  $J$  = 15.5 Hz, 1H), 8.26-8.24 (m, 1H), 8.12-8.09 (m, 2H), 7.87-7.83 (m, 2H), 7.62-7.57 (m, 4H), 7.54-7.51 (m, 2H), 7.42-7.38 (m, 3H).  $^{13}\text{C}$  NMR (125 MHz,  $\text{CDCl}_3$ ):  $\delta$  (ppm) = 191.9, 162.0, 150.7, 144.4, 142.3, 138.2, 135.8, 132.8, 131.4, 130.4, 130.1, 129.1, 128.7, 128.2, 126.9, 126.1, 125.7, 124.8, 120.7, 110.8. HRMS (ESI): calcd. for  $\text{C}_{22}\text{H}_{16}\text{NO}_2$   $[\text{M}+\text{H}]^+$  326.1181, Found: 326.1175.

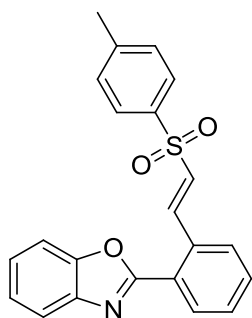

**(3n)**: 154 mg, 82% yield, white solid: m.p. 134-135°C.  $^1\text{H}$  NMR (500 MHz,  $\text{CDCl}_3$ ):  $\delta$  (ppm) = 8.11 (dd,  $J$  = 7.5, 1.0 Hz, 1H), 7.82 (d,  $J$  = 11.5 Hz, 1H), 7.71-7.68 (m, 1H), 7.63 (d,  $J$  = 7.5 Hz, 1H), 7.55-7.47 (m, 3H), 7.39-7.33 (m, 4H), 6.87 (d,  $J$  = 8.0 Hz, 2H), 6.74 (d,  $J$  = 11.5 Hz, 1H).  $^{13}\text{C}$  NMR (125 MHz,  $\text{CDCl}_3$ ):  $\delta$  (ppm) = 161.5, 150.2, 144.0, 142.6, 142.0, 137.7, 133.1, 132.1, 131.9, 130.6, 139.3, 129.1, 128.7,

127.6, 125.5, 124.7, 124.5, 120.4, 110.5. HRMS (ESI): calcd. for  $C_{22}H_{18}NO_3S$   $[M+H]^+$  376.1007, Found: 376.1010.

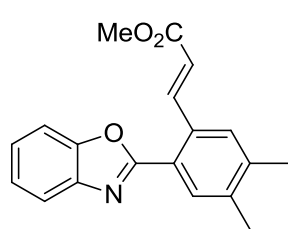

(**4a**): 114 mg, 74% yield, white solid: m.p. 176-178°C.  $^1H$  NMR (500 MHz,  $CDCl_3$ ):  $\delta$  (ppm) = 8.80 (d,  $J$  = 16.0 Hz, 1H), 7.96 (s, 1H), 7.84-7.80 (m, 1H), 7.60-7.57 (m, 1H), 7.49 (s, 1H), 7.37-7.34 (m, 2H), 6.44 (d,  $J$  = 16.0 Hz, 1H), 2.35 (s, 3H), 2.33 (s, 3H).  $^{13}C$  NMR (125 MHz,  $CDCl_3$ ):  $\delta$  (ppm) = 167.5, 162.3, 150.5, 143.8, 142.2, 140.5, 139.2, 132.4, 131.3, 129.0, 125.3, 124.6, 124.0, 120.5, 119.7, 110.6, 51.8, 20.0, 19.7. HRMS (ESI): calcd. for  $C_{19}H_{18}NO_3$   $[M+H]^+$  308.1287, Found: 308.1285.

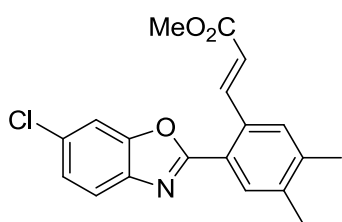

(**4b**): 119 mg, 70% yield, white solid: m.p. 157-159°C.  $^1H$  NMR (500 MHz,  $CDCl_3$ ):  $\delta$  (ppm) = 8.76 (d,  $J$  = 16.0 Hz, 1H), 7.90 (s, 1H), 7.69 (d,  $J$  = 8.5 Hz, 1H), 7.56 (d,  $J$  = 1.5 Hz, 1H), 7.47 (s, 1H), 7.32 (dd,  $J$  = 8.5, 1.5 Hz, 1H), 6.42 (d,  $J$  = 16.0 Hz, 1H), 3.83 (s, 3H), 2.33 (s, 3H), 2.32 (s, 3H).  $^{13}C$  NMR (125 MHz,  $CDCl_3$ ):  $\delta$  (ppm) = 167.4, 162.9, 150.6, 143.6, 141.0, 140.9, 139.2, 132.5, 131.2, 130.9, 129.1, 125.3, 123.4, 120.9, 119.9, 111.2, 51.8, 20.0, 19.7. HRMS (ESI): calcd. for  $C_{19}H_{17}ClNO_3$   $[M+H]^+$  342.0897, Found: 342.0891.

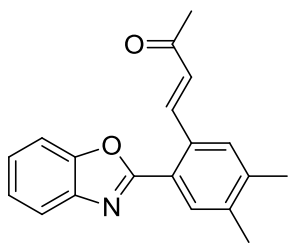

(**4c**): 82 mg, 56 % yield, white solid: m.p. 102-104°C.  $^1H$  NMR (500 MHz,  $CDCl_3$ ):  $\delta$  (ppm) = 8.79 (d,  $J$  = 16.0 Hz, 1H), 7.97 (s, 1H), 7.80-7.76 (m, 1H), 7.59-7.55 (m, 1H), 7.49 (s, 1H), 7.38-7.34 (m, 2H), 6.63 (d,  $J$  = 16.0 Hz, 1H), 2.47 (s, 3H), 2.35 (s, 3H), 2.33 (s, 3H).  $^{13}C$  NMR (125 MHz,  $CDCl_3$ ):  $\delta$  (ppm) = 199.4, 162.2, 150.3, 143.2, 142.1, 140.7, 139.4, 132.5, 131.2, 129.4, 129.0, 125.4, 124.7, 123.9, 120.3, 110.6, 26.8, 20.0, 19.8. HRMS (ESI): calcd. for  $C_{19}H_{18}NO_2$   $[M+H]^+$  292.1338, Found: 292.1334.

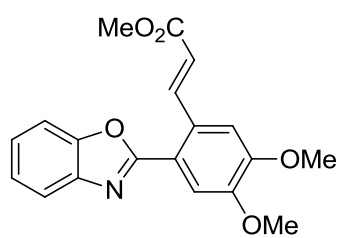

**(4d)**: 122 mg, 72% yield, white solid: m.p. 155-156°C.  $^1\text{H}$  NMR (500 MHz,  $\text{CDCl}_3$ ):  $\delta$  (ppm) = 8.85 (d,  $J$  = 16.0 Hz, 1H), 7.84-7.81 (m, 1H), 7.68 (s, 1H), 7.62-7.58 (m, 1H), 7.39-7.35 (m, 2H), 7.18 (s, 1H), 6.41 (d,  $J$  = 16.0 Hz, 1H), 4.03 (s, 3H), 3.99 (s, 3H), 3.84 (s, 3H).  $^{13}\text{C}$  NMR (125 MHz,  $\text{CDCl}_3$ ):  $\delta$  (ppm) = 167.4, 161.9, 151.2, 150.5, 150.4, 143.4, 142.1, 128.4, 125.3, 124.7, 120.4, 119.8, 119.1, 112.2, 110.6, 109.6, 56.3, 56.1, 51.8. HRMS (ESI): calcd. for  $\text{C}_{19}\text{H}_{18}\text{NO}_5$   $[\text{M}+\text{H}]^+$  340.1185, Found: 340.1179.

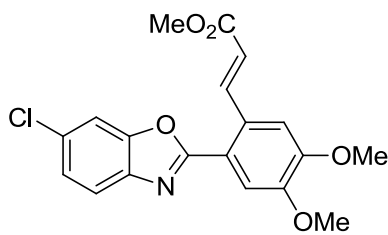

**(4e)**: 132 mg, 71% yield, white solid: m.p. 200-201°C.  $^1\text{H}$  NMR (500 MHz,  $\text{CDCl}_3$ ):  $\delta$  (ppm) = 8.82 (d,  $J$  = 16.0 Hz, 1H), 7.71 (d,  $J$  = 8.5 Hz, 1H), 7.63 (s, 1H), 7.60 (d,  $J$  = 2.0 Hz, 1H), 7.34 (dd,  $J$  = 8.5, 1.5 Hz, 2H), 7.17 (s, 1H), 6.40 (d,  $J$  = 16.0 Hz, 1H), 4.02 (s, 3H), 3.99 (s, 3H), 3.84 (s, 3H).  $^{13}\text{C}$  NMR (125 MHz,  $\text{CDCl}_3$ ):  $\delta$  (ppm) = 167.4, 162.6, 151.6, 150.7, 150.5, 143.4, 141.0, 130.9, 128.7, 125.5, 120.9, 119.4, 119.3, 112.2, 111.3, 109.8, 56.4, 56.2, 52.0. HRMS (ESI): calcd. for  $\text{C}_{19}\text{H}_{17}\text{ClNO}_5$   $[\text{M}+\text{H}]^+$  374.0795, Found: 374.0795.

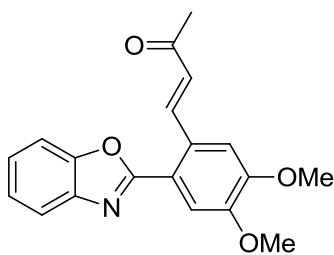

**(4f)**: 118 mg, 73% yield, white solid: m.p. 134-136°C.  $^1\text{H}$  NMR (500 MHz,  $\text{CDCl}_3$ ):  $\delta$  (ppm) = 8.87 (d,  $J$  = 16.0 Hz, 1H), 7.81-7.78 (m, 1H), 7.70 (s, 1H), 7.62-7.58 (m, 1H), 7.40-7.36 (m, 2H), 7.20 (s, 1H), 6.62 (d,  $J$  = 16.0 Hz, 1H), 4.04 (s, 3H), 3.99 (s, 3H), 2.49 (s, 3H).  $^{13}\text{C}$  NMR (125 MHz,  $\text{CDCl}_3$ ):  $\delta$  (ppm) = 199.4, 161.9, 151.4, 150.6, 150.3, 143.0, 142.1, 129.0, 128.6, 125.5, 124.8, 120.3, 119.7, 112.7, 110.6, 109.5, 56.4, 56.2, 26.7. HRMS (ESI): calcd. for  $\text{C}_{19}\text{H}_{18}\text{NO}_4$   $[\text{M}+\text{H}]^+$  324.1236, Found: 324.1228.

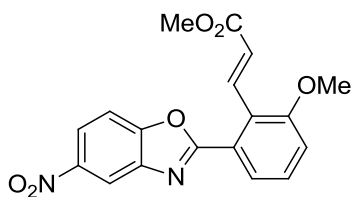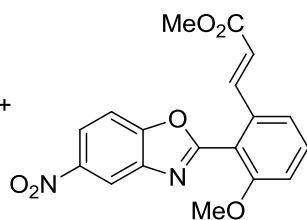

**(4g+4g')**: 135 mg, 76% yield, white solid: m.p. 153-155°C.  $^1\text{H}$  NMR (500 MHz,  $\text{CDCl}_3$ ):  $\delta$  (ppm) = 8.70 (d,  $J$  = 2.0 Hz, 1H), 8.39 (d,  $J$  = 16.0 Hz, 1H), 8.33 (dd,  $J$  = 9.0, 2.0 Hz, 1H), 7.72 (dd,  $J$  =

8.0, 2.0 Hz, 1H), 7.68 (d,  $J = 9.0$  Hz, 1H), 7.48 (t,  $J = 8.0$  Hz, 1H), 7.18 (d,  $J = 8.5$  Hz, 1H), 6.75 (d,  $J = 16.0$  Hz, 1H), 3.96 (s, 3H), 3.81 (s, 3H).  $^{13}\text{C}$  NMR (125 MHz,  $\text{CDCl}_3$ ):  $\delta$  (ppm) = 168.1, 165.3, 159.3, 154.1, 145.5, 142.4, 138.5, 130.4, 127.5, 124.5, 123.9, 123.1, 121.6, 117.0, 114.7, 111.0, 56.1, 51.9. HRMS (ESI): calcd. for  $\text{C}_{18}\text{H}_{15}\text{N}_2\text{O}_6$   $[\text{M}+\text{H}]^+$  355.0930, Found: 355.0921.

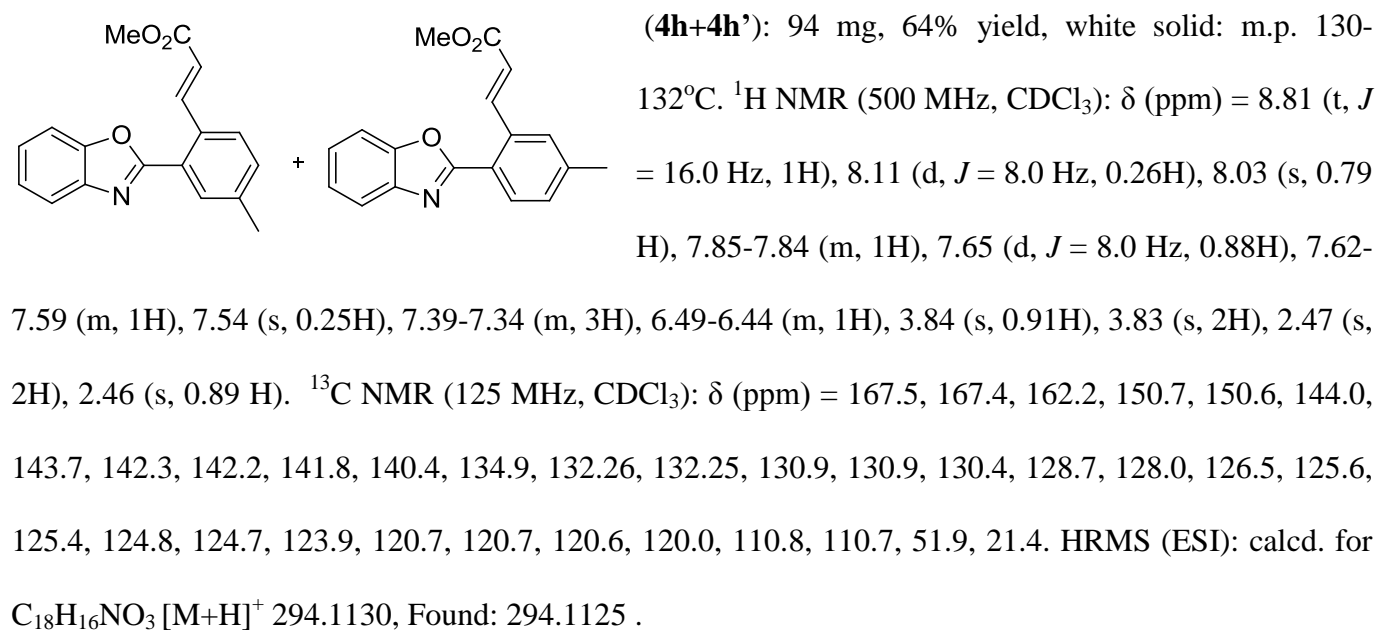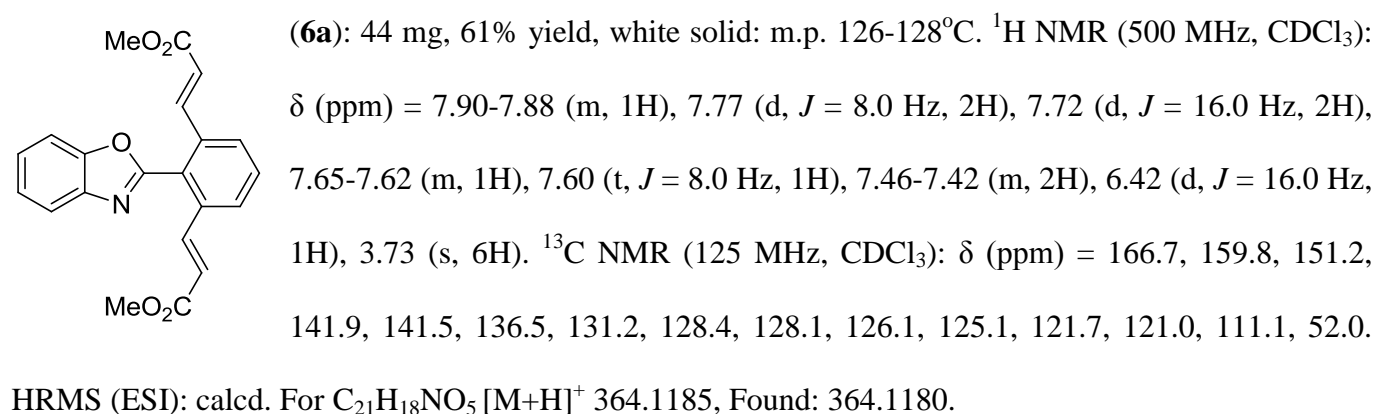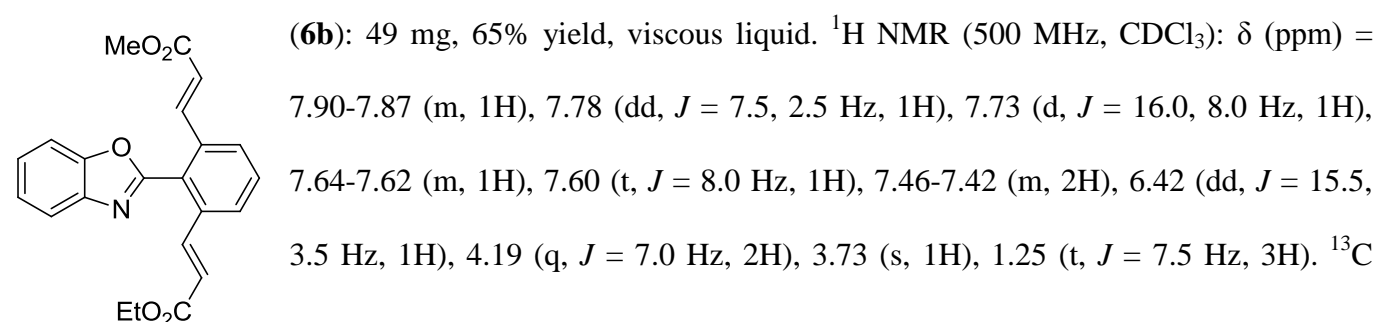

NMR (125 MHz, CDCl<sub>3</sub>):  $\delta$  (ppm) = 166.7, 166.3, 159.8, 151.1, 141.9, 141.6, 141.5, 136.6, 136.4, 131.2, 128.4, 128.1, 126.1, 125.1, 122.1, 121.7, 121.0, 111.1, 60.8, 52.0, 14.3. HRMS (ESI): calcd. For C<sub>22</sub>H<sub>20</sub>NO<sub>5</sub> [M+H]<sup>+</sup> 378.1341, Found: 378.1335.

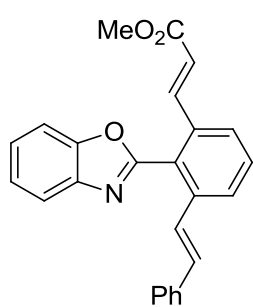

(**6c**): 34 mg, 45% yield, viscous liquid. <sup>1</sup>H NMR (500 MHz, CDCl<sub>3</sub>):  $\delta$  (ppm) = 7.92-7.89 (m, 1H), 7.86 (d, *J* = 7.0 Hz, 1H), 7.71-7.67 (m, 2H), 7.50-7.62 (m, 1H), 7.58 (t, *J* = 8.0 Hz, 1H), 7.46-7.43 (m, 2H), 7.36-7.34 (m, 2H), 7.28 (t, *J* = 7.0 Hz, 1H), 7.23 (tt, *J* = 6.5, 1.5 Hz, 1H), 7.10 (d, *J* = 1.5 Hz, 1H), 6.42 (d, *J* = 15.5 Hz, 1H), 3.73 (s, 2H). <sup>13</sup>C NMR (125 MHz, CDCl<sub>3</sub>):  $\delta$  (ppm) = 166.9, 160.9, 151.1,

142.3, 141.6, 139.4, 136.9, 136.1, 132.6, 131.1, 128.8, 128.3, 127.5, 127.0, 126.9, 126.0, 125.8, 125.6, 124.9, 121.1, 120.9, 111.1, 51.9. HRMS (ESI): calcd. For C<sub>25</sub>H<sub>20</sub>NO<sub>3</sub> [M+H]<sup>+</sup> 382.1443, Found: 382.1437.

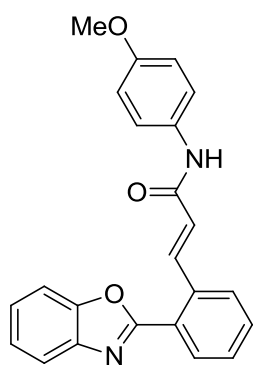

(**8**): 56 mg, 76% yield, white solid: m.p. 257-258°C. <sup>1</sup>H NMR (500 MHz, CDCl<sub>3</sub>):  $\delta$  (ppm) = 10.2 (s, 1H), 8.57 (d, *J* = 15.5 Hz, 1H), 8.18 (d, *J* = 8.0 Hz, 1H), 7.90-7.88 (m, 2H), 7.83 (d, *J* = 7.5 Hz, 1H), 7.71 (t, *J* = 7.0 Hz, 1H), 7.66-7.63 (m, 3H), 7.50-7.44 (m, 2H), 6.93 (d, *J* = 9.0 Hz, 2H), 6.85 (d, *J* = 15.5 Hz, 1H), 3.74 (s, 3H). <sup>13</sup>C

NMR (125 MHz, CDCl<sub>3</sub>):  $\delta$  (ppm) = 162.9, 161.5, 155.4, 149.9, 141.5, 138.0, 135.1, 132.4, 131.8, 130.3, 129.7, 127.6, 125.9, 125.53, 125.47, 125.0, 120.7, 120.1, 114.0, 111.0, 55.2. HRMS (ESI): calcd. For C<sub>23</sub>H<sub>19</sub>N<sub>2</sub>O<sub>3</sub> [M+H]<sup>+</sup> 371.1396, Found: 371.1399.

# 5 <sup>1</sup>H NMR and <sup>13</sup>C NMR Spectra of All Compounds

## Compound 1a

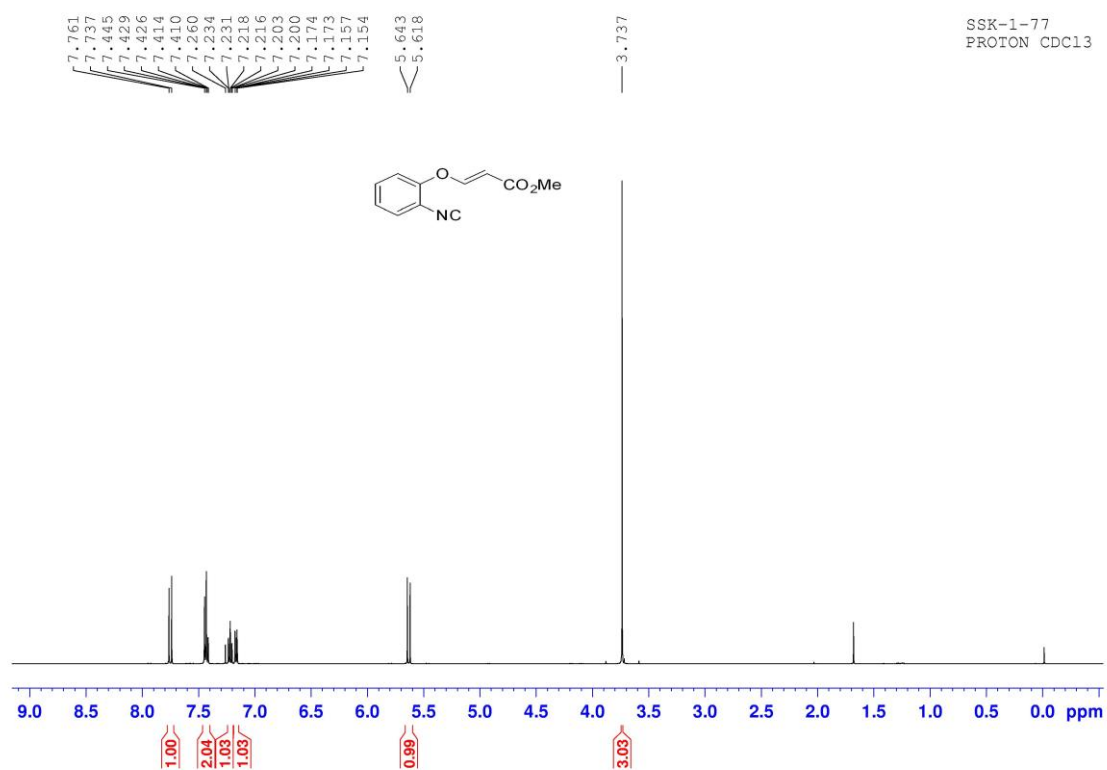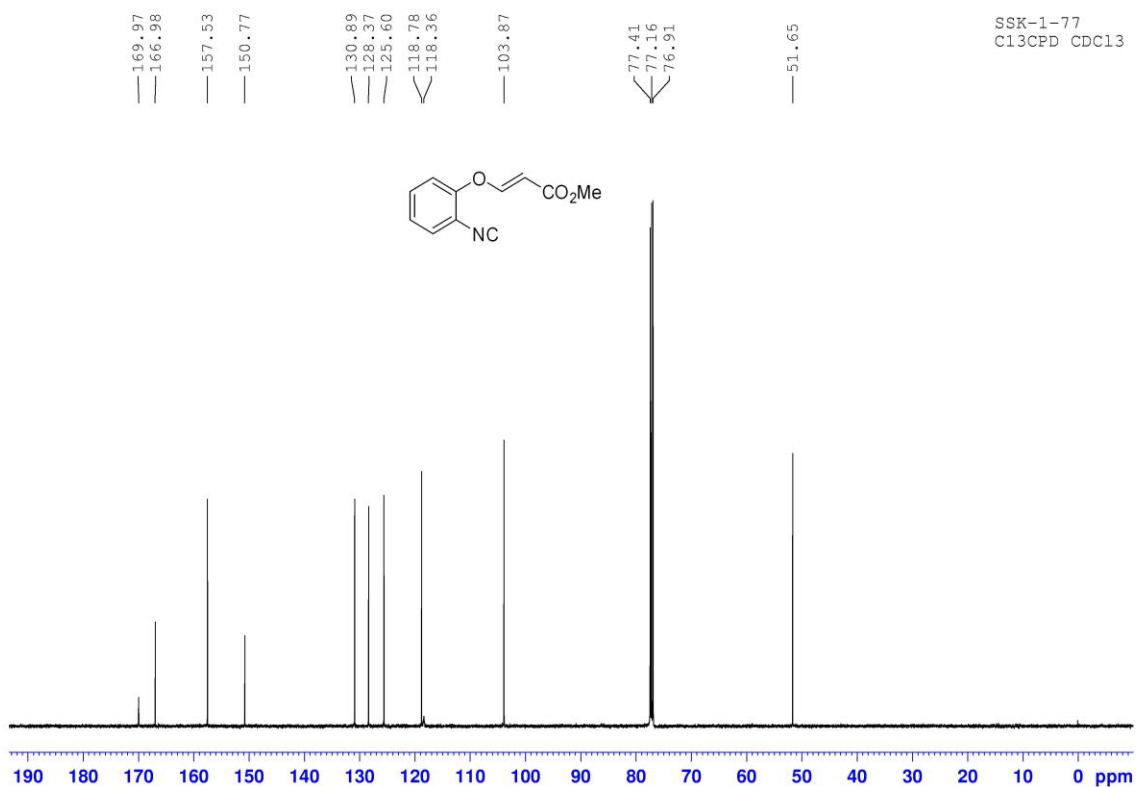

# Compound 1b

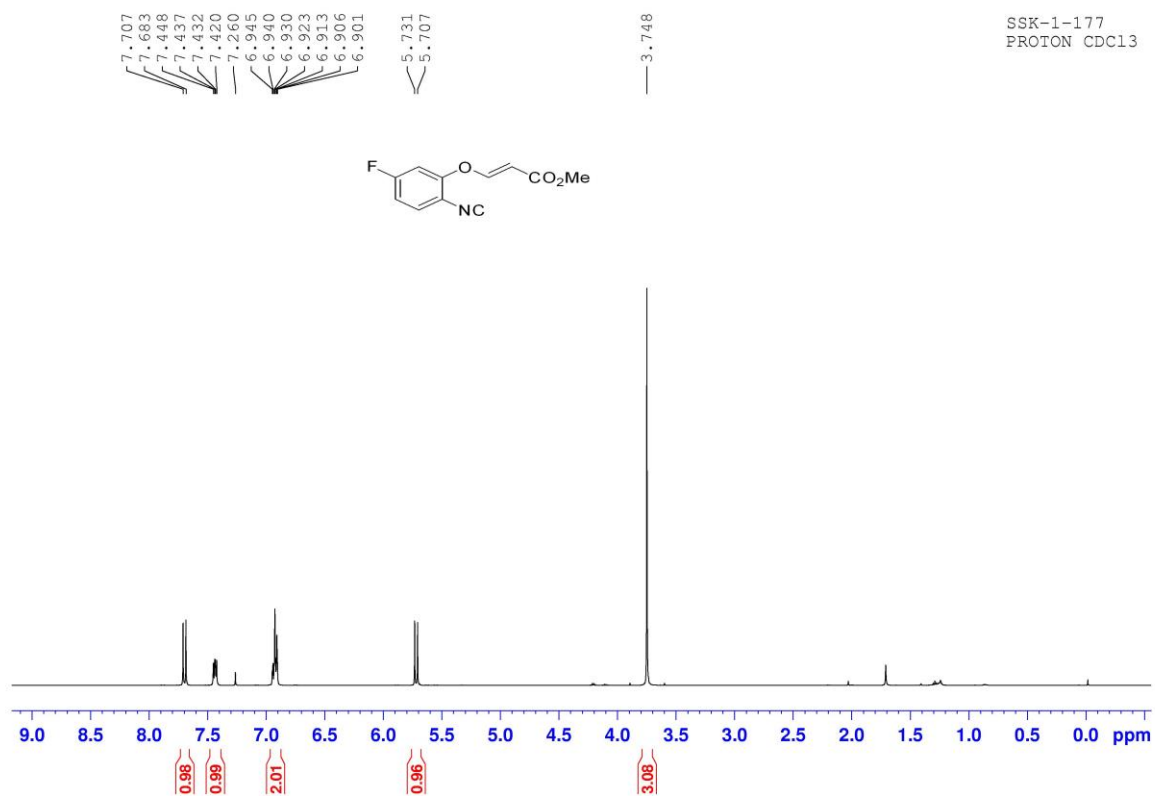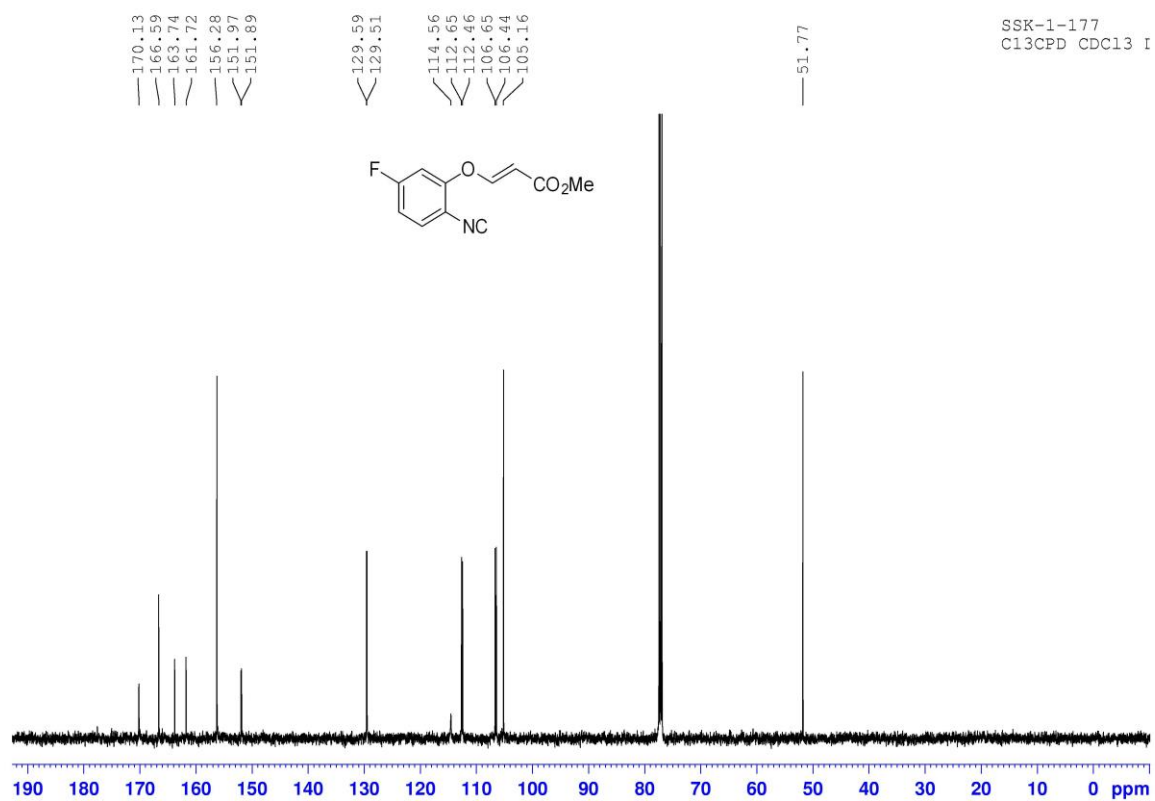

# Compound 1c

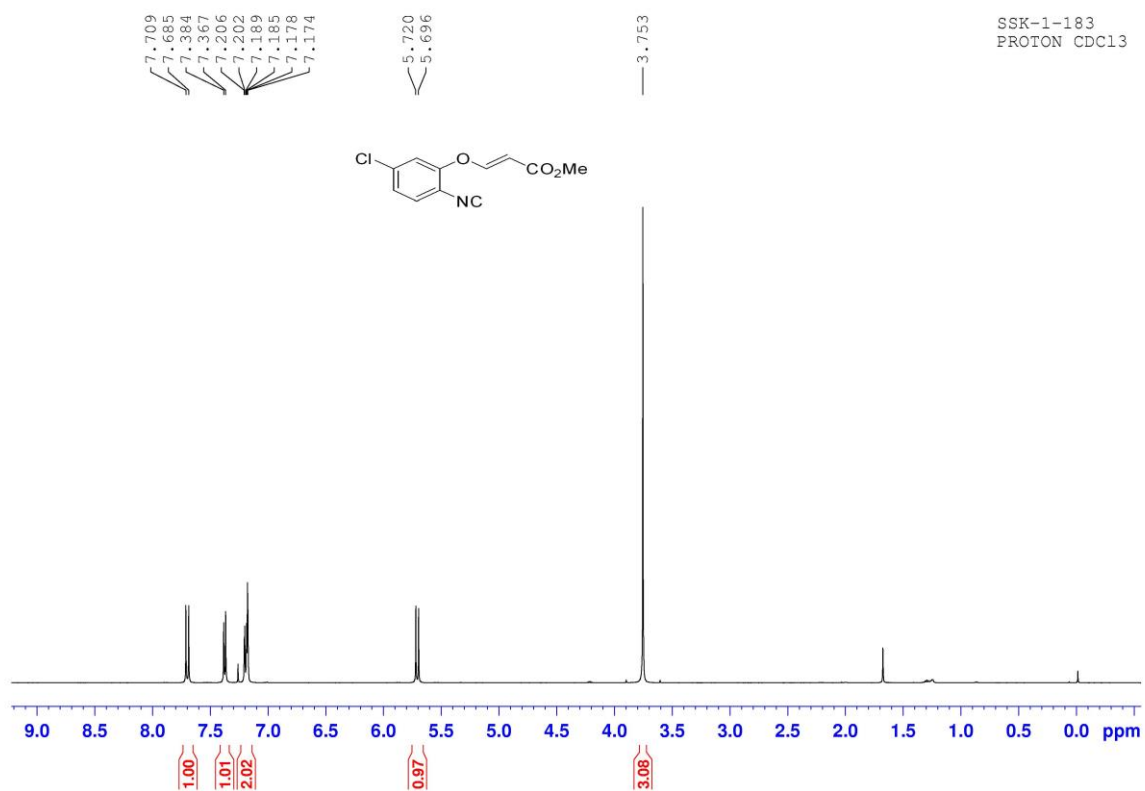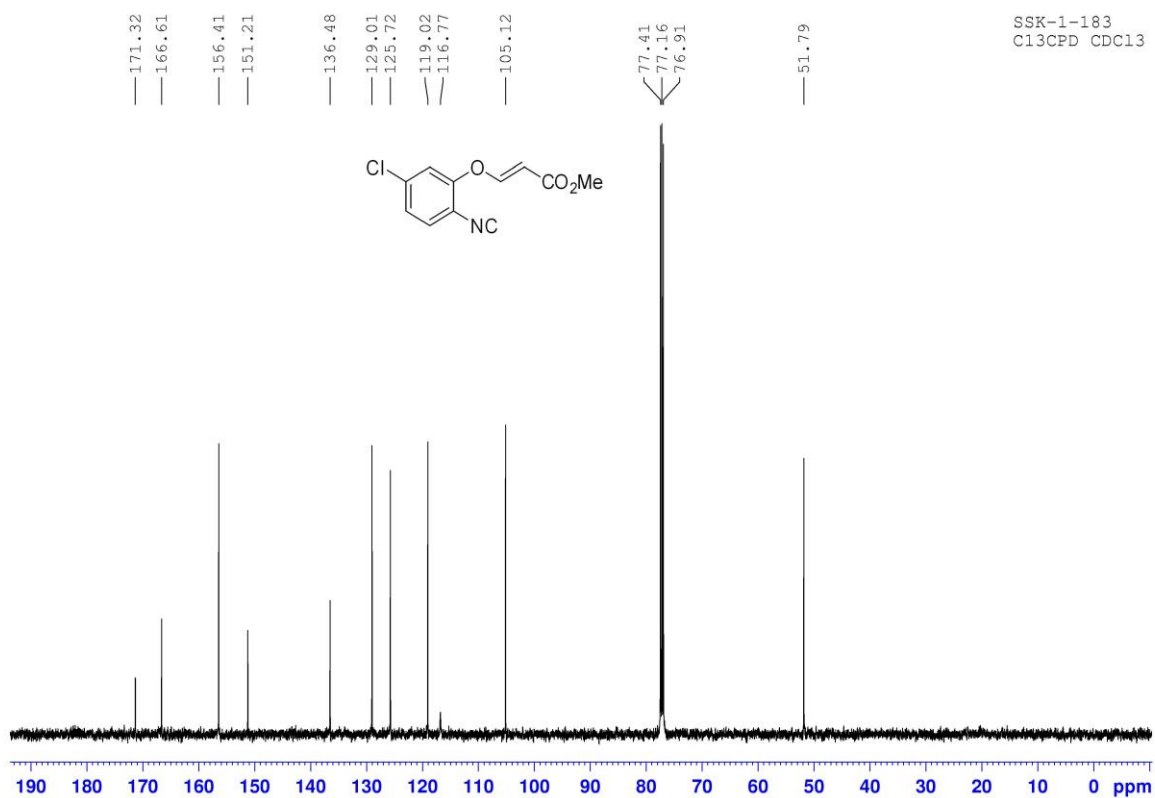

# Compound **1d**

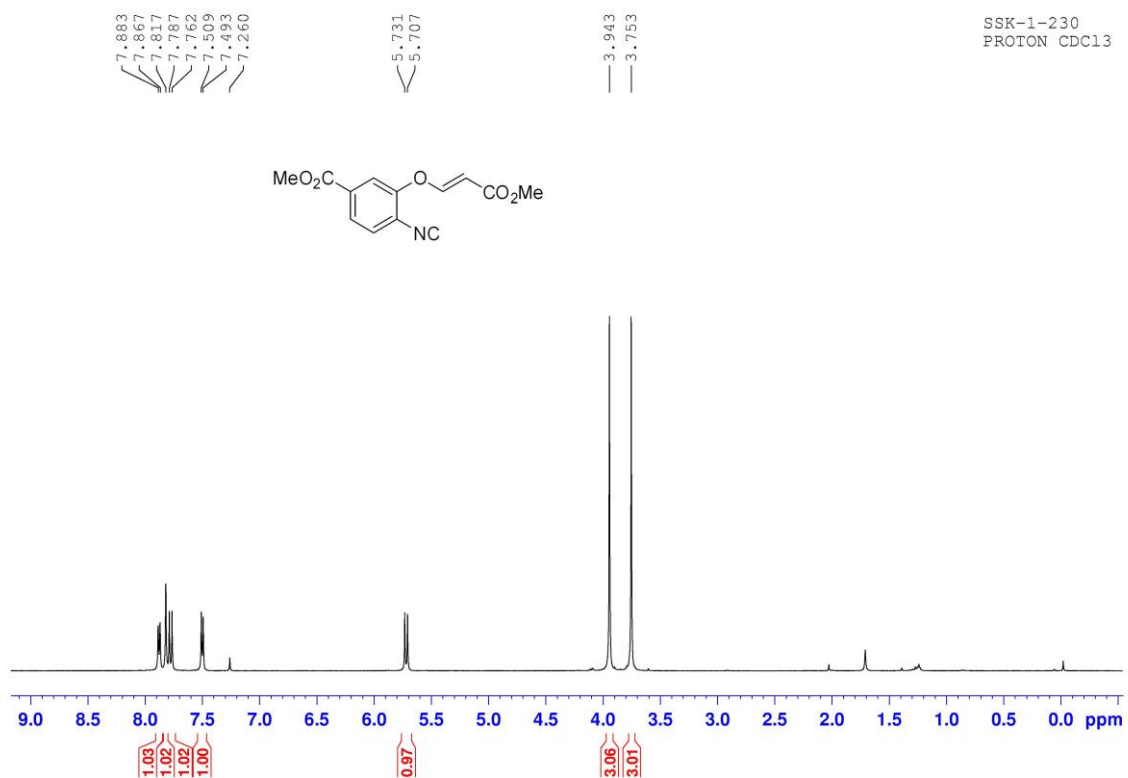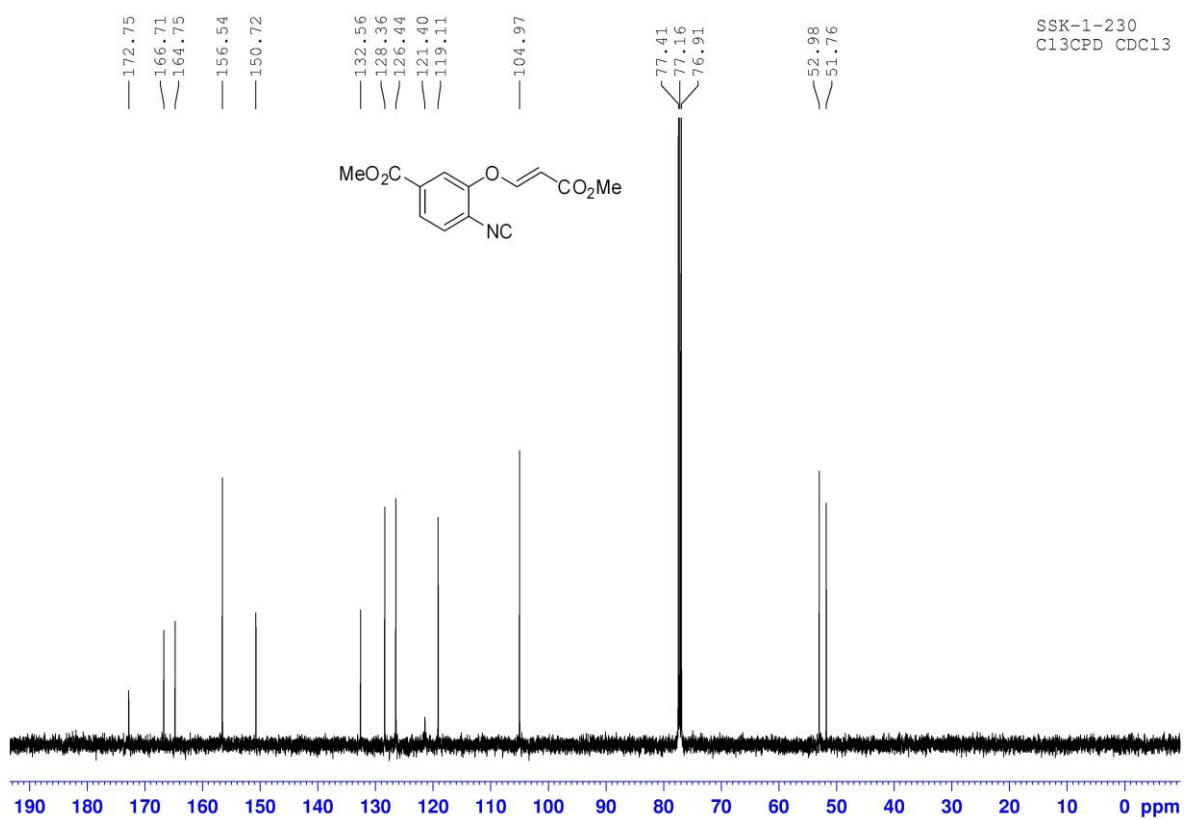

# Compound 1e

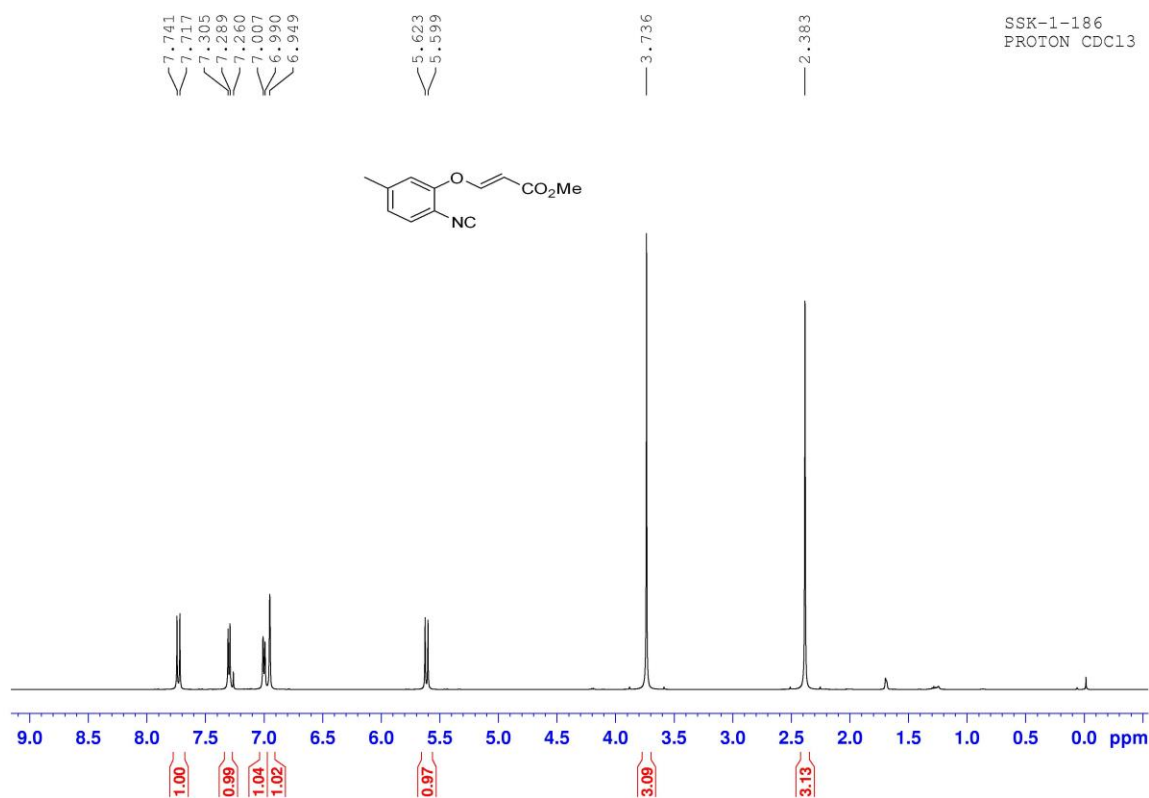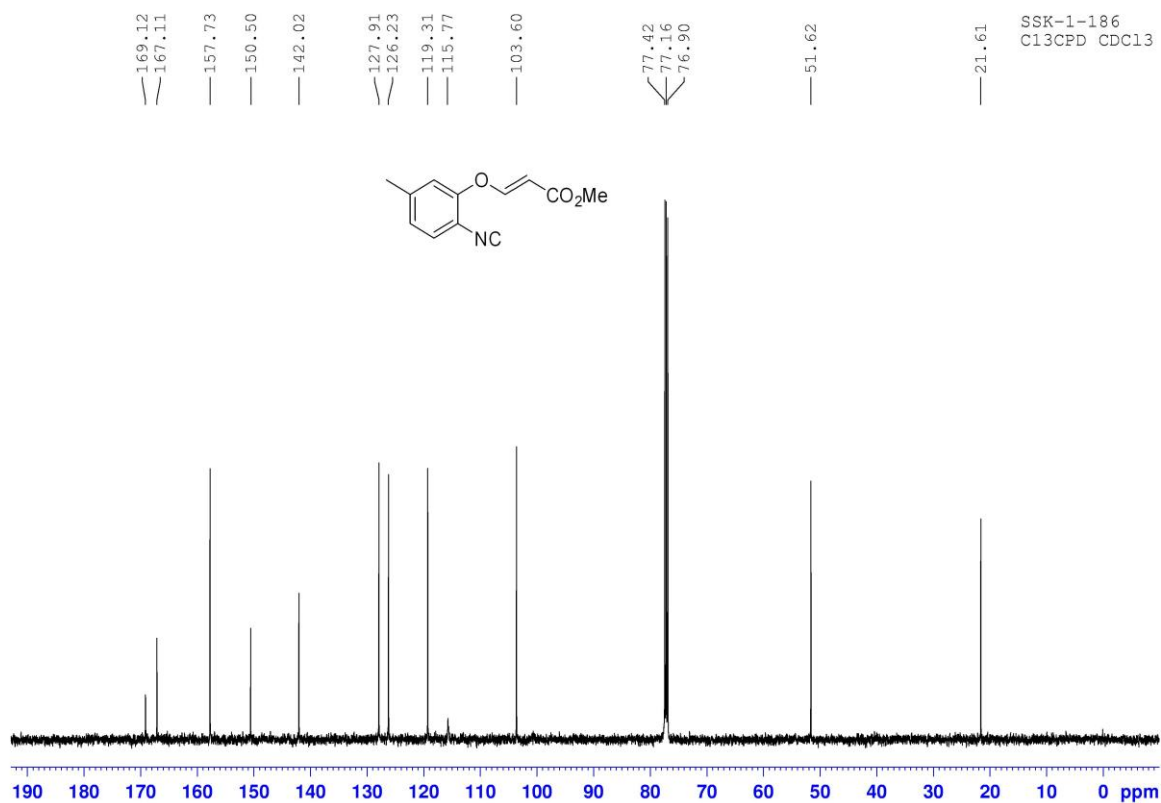

# Compound **1f**

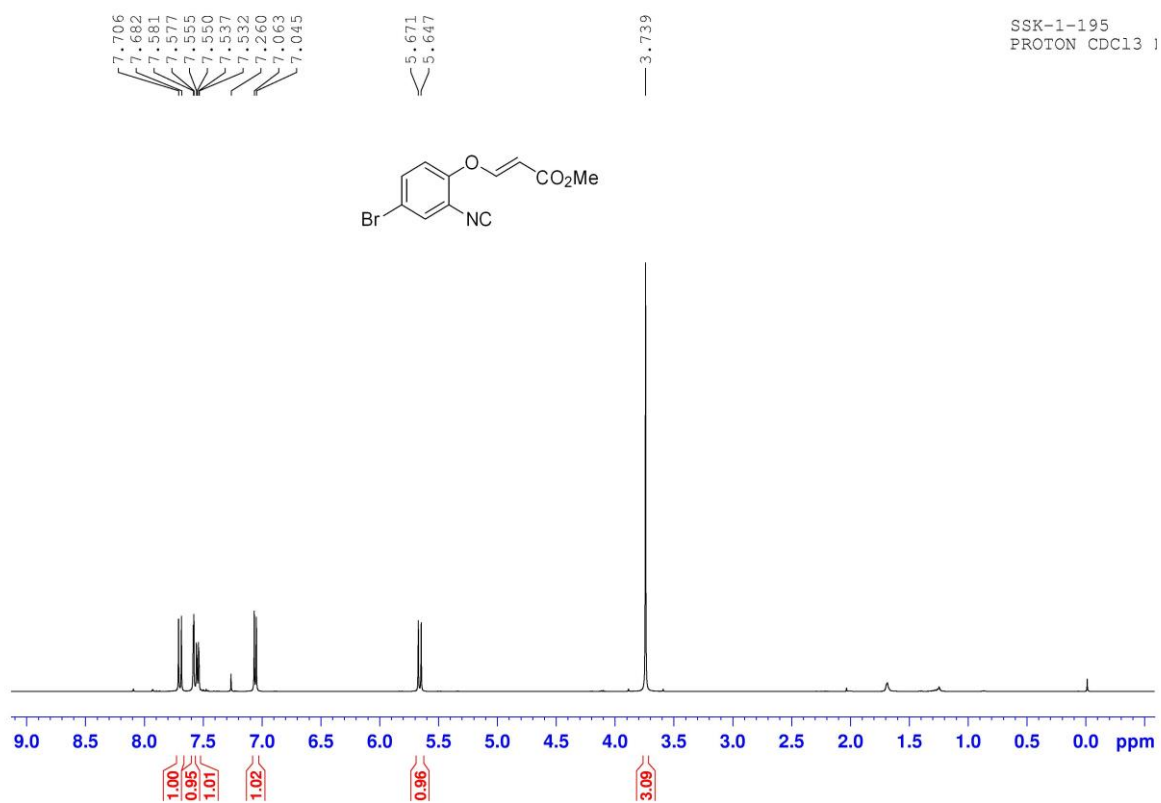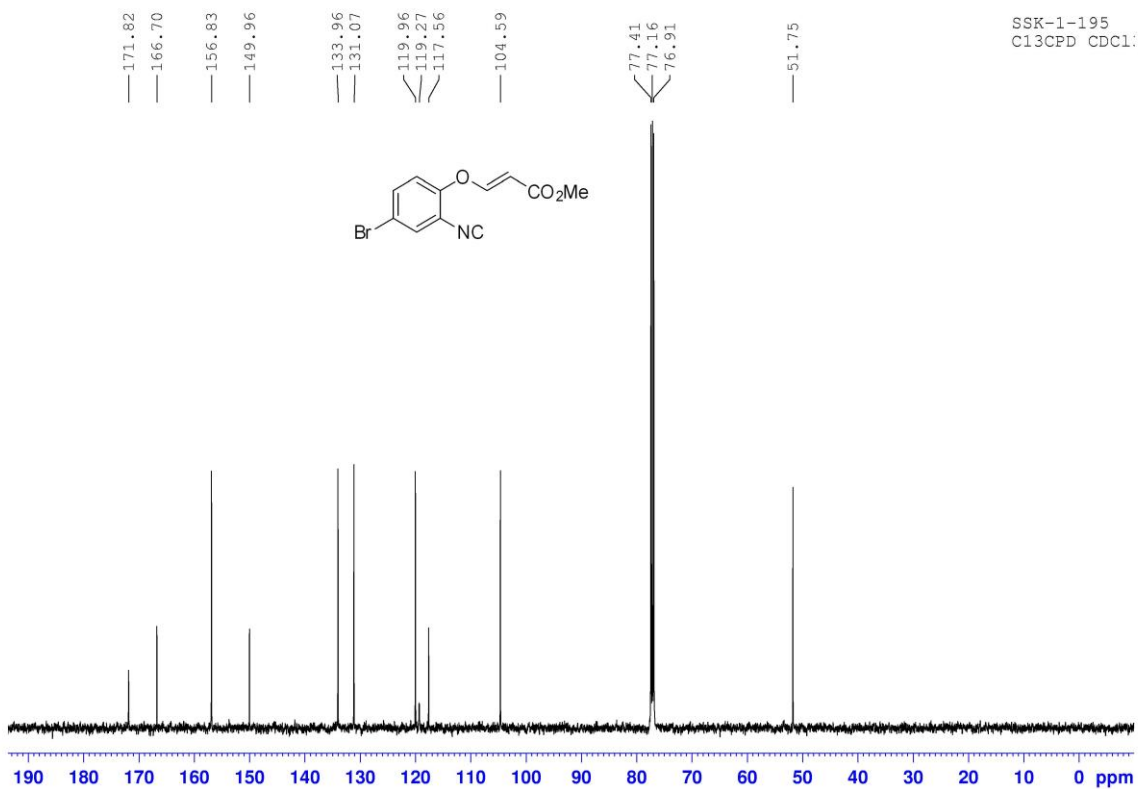

# Compound 1g

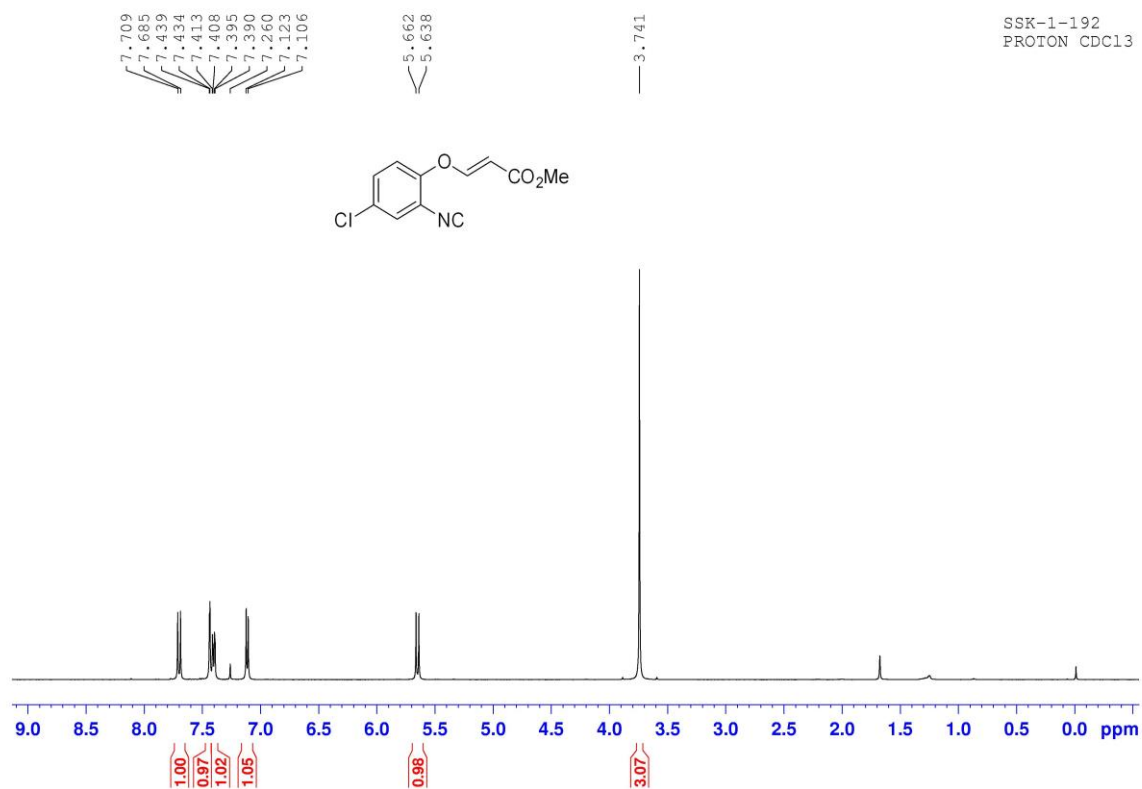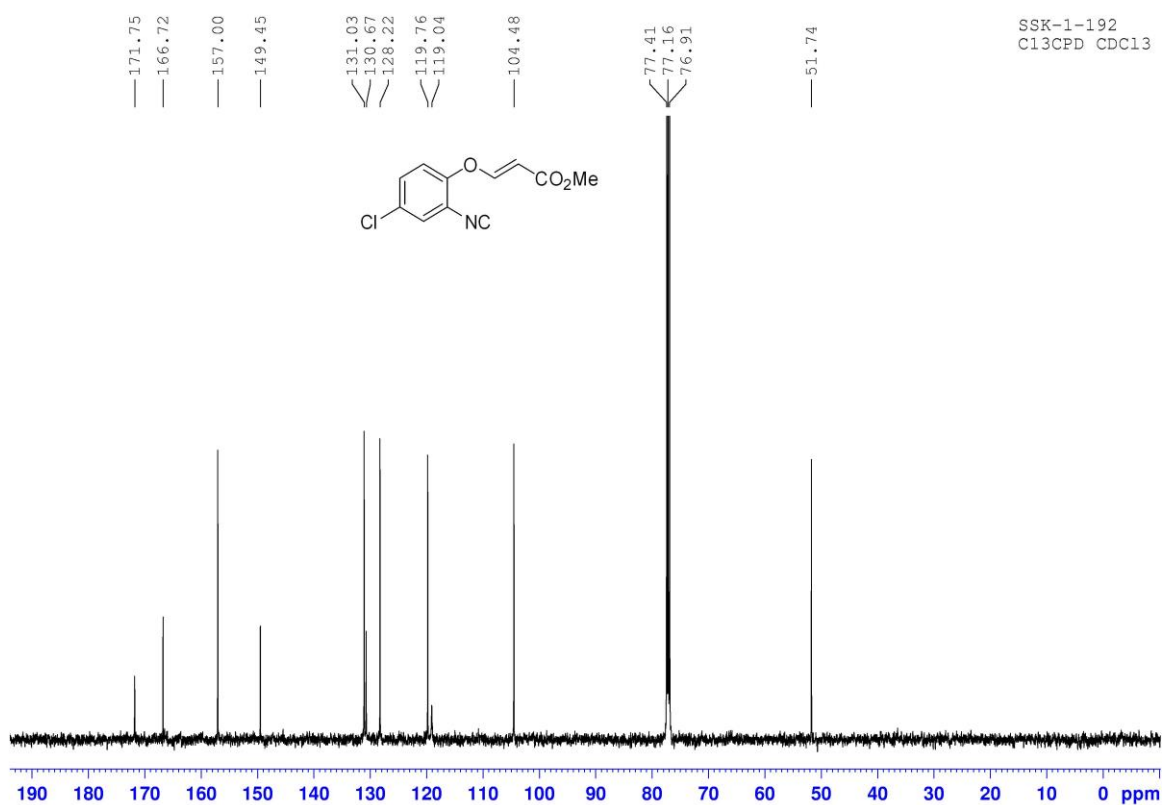

# Compound 1h

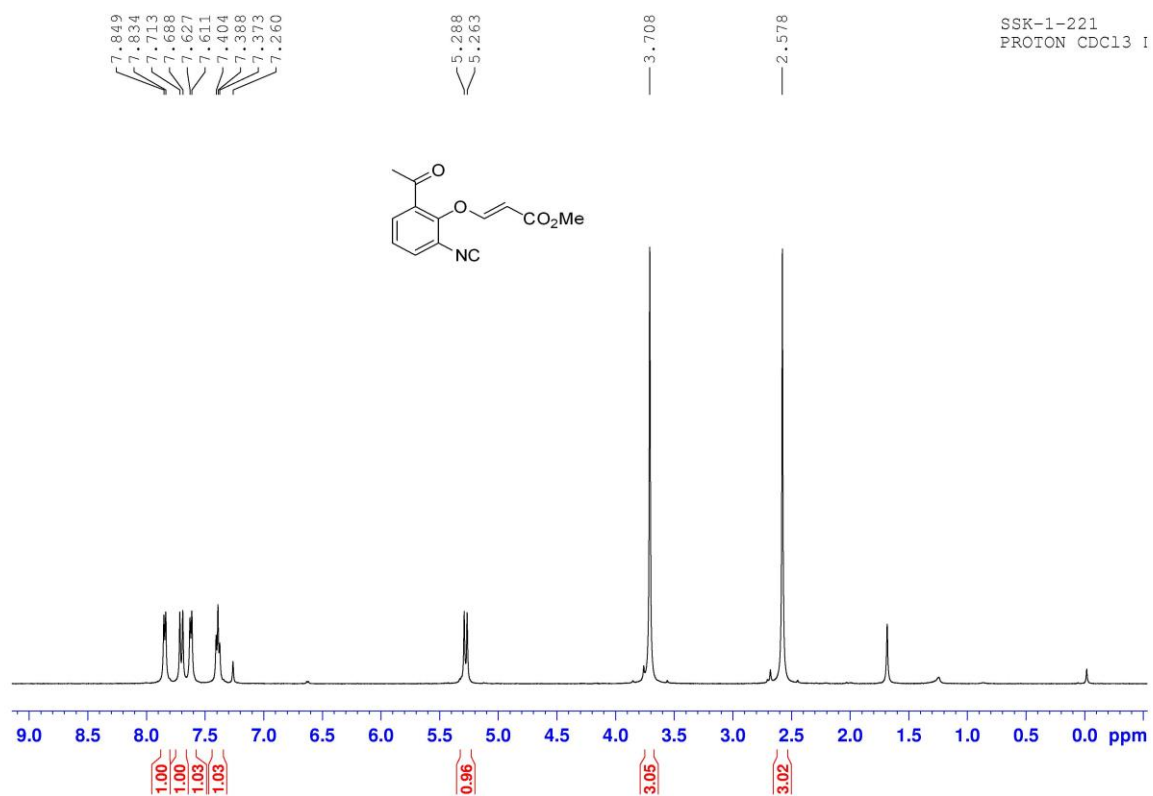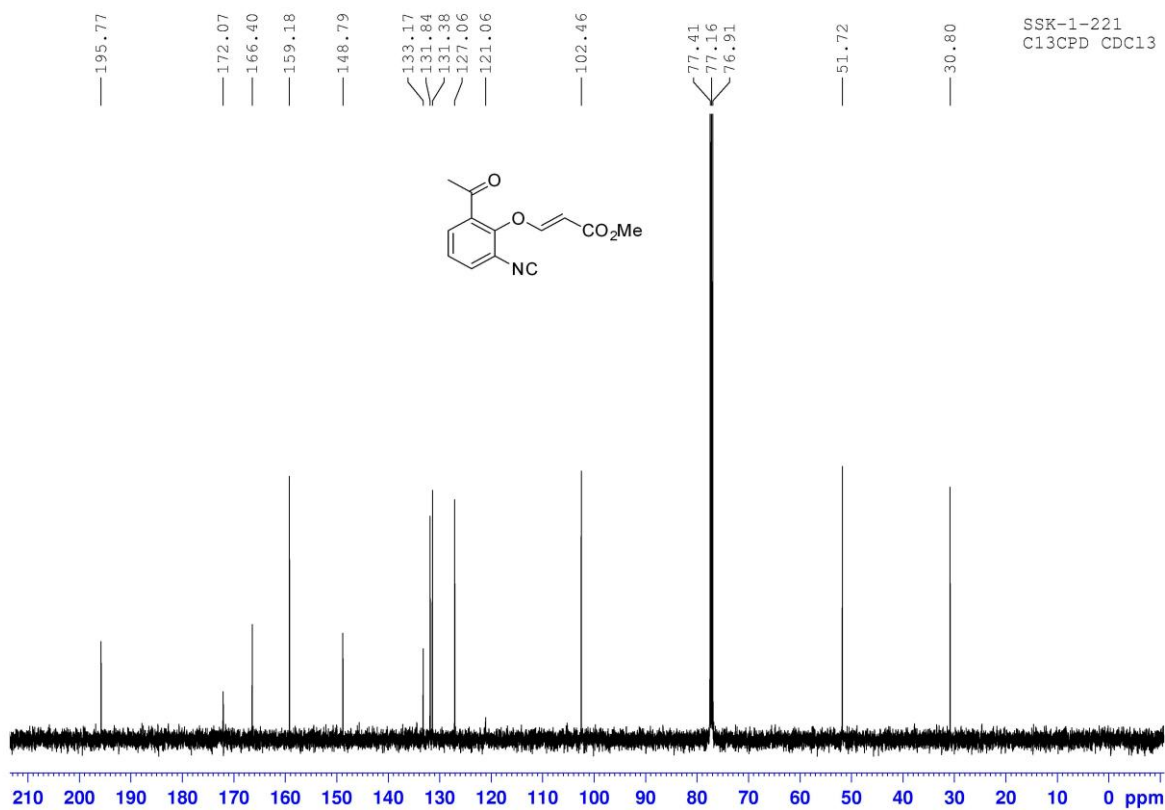

# Compound **1i**

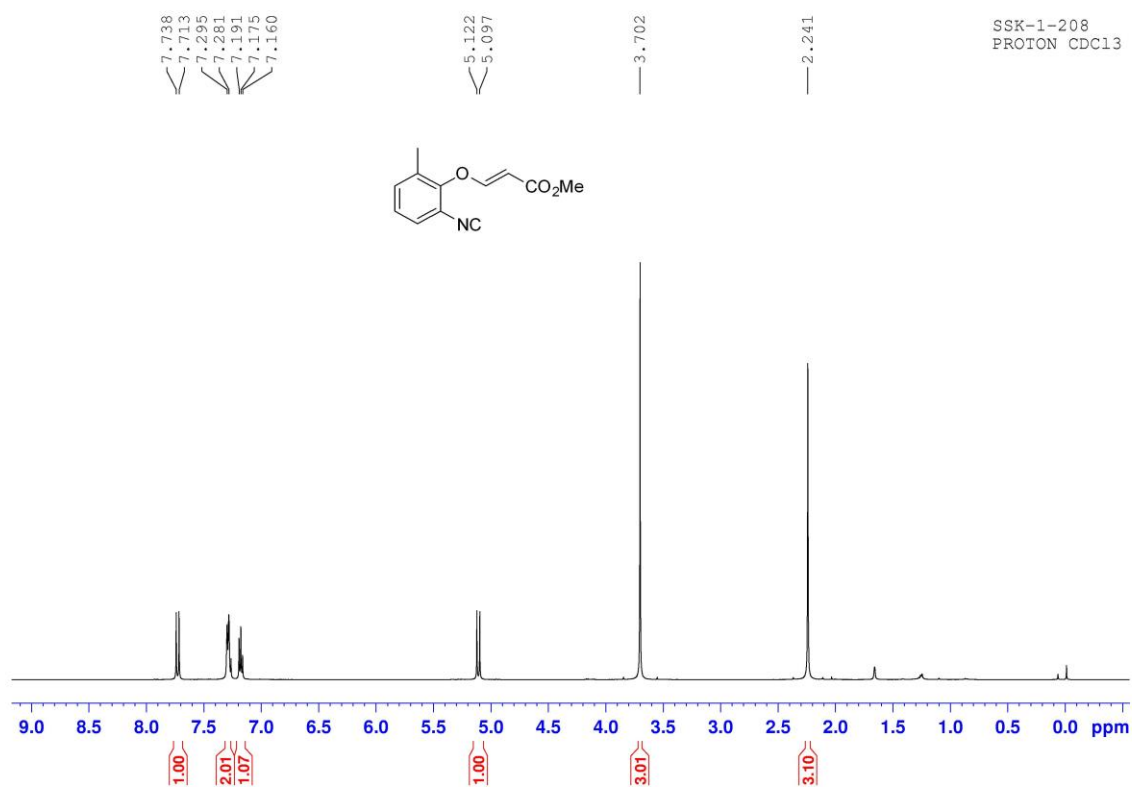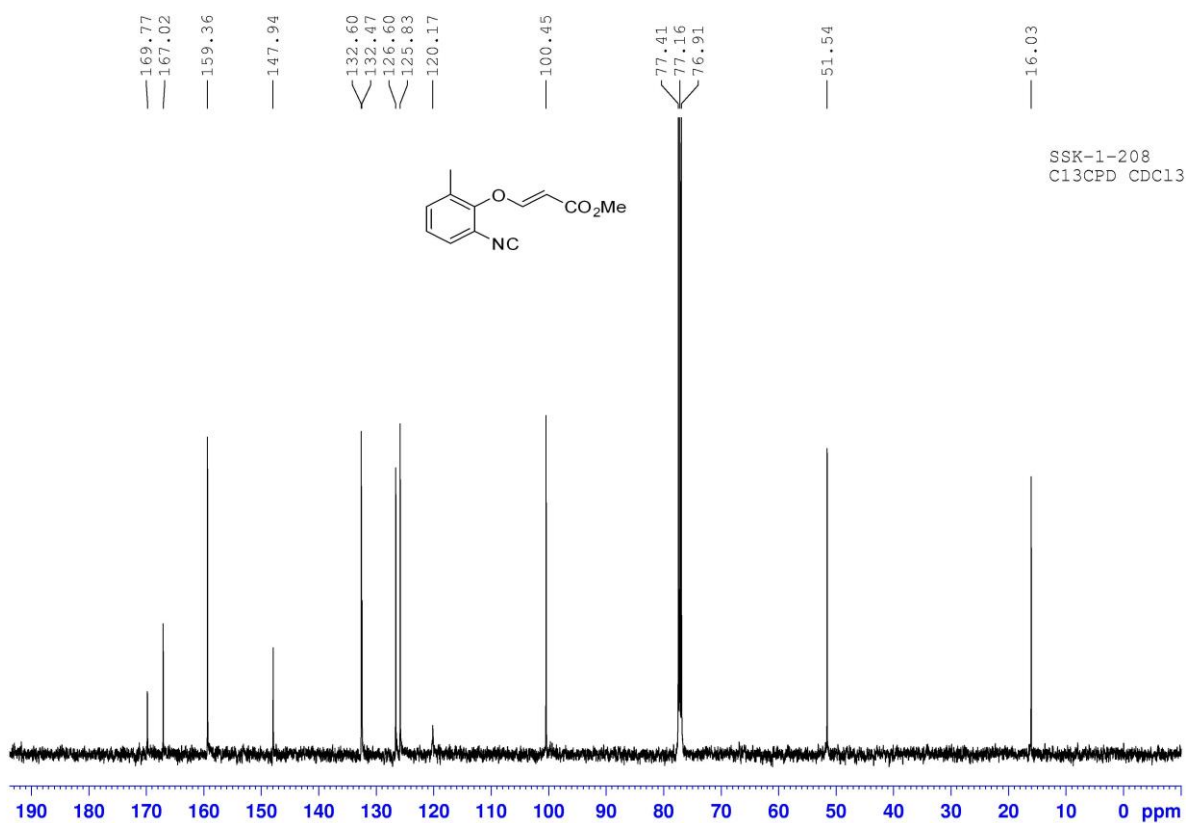

# Compound 1j

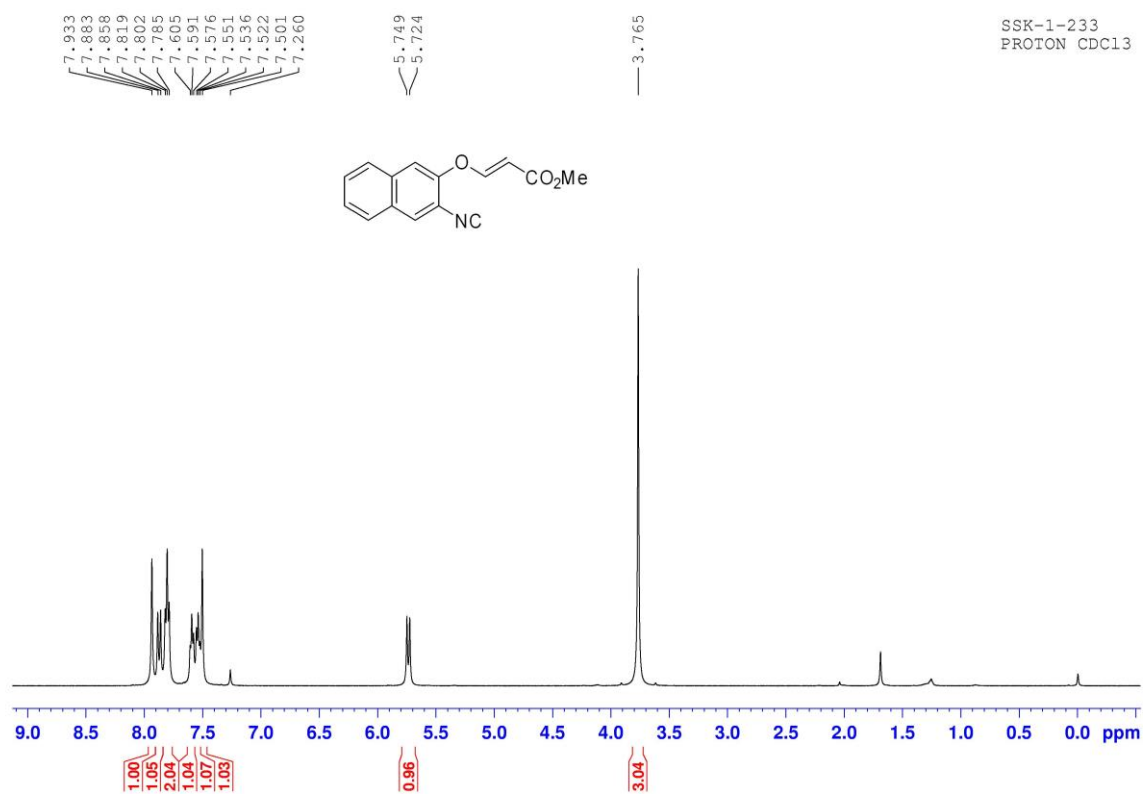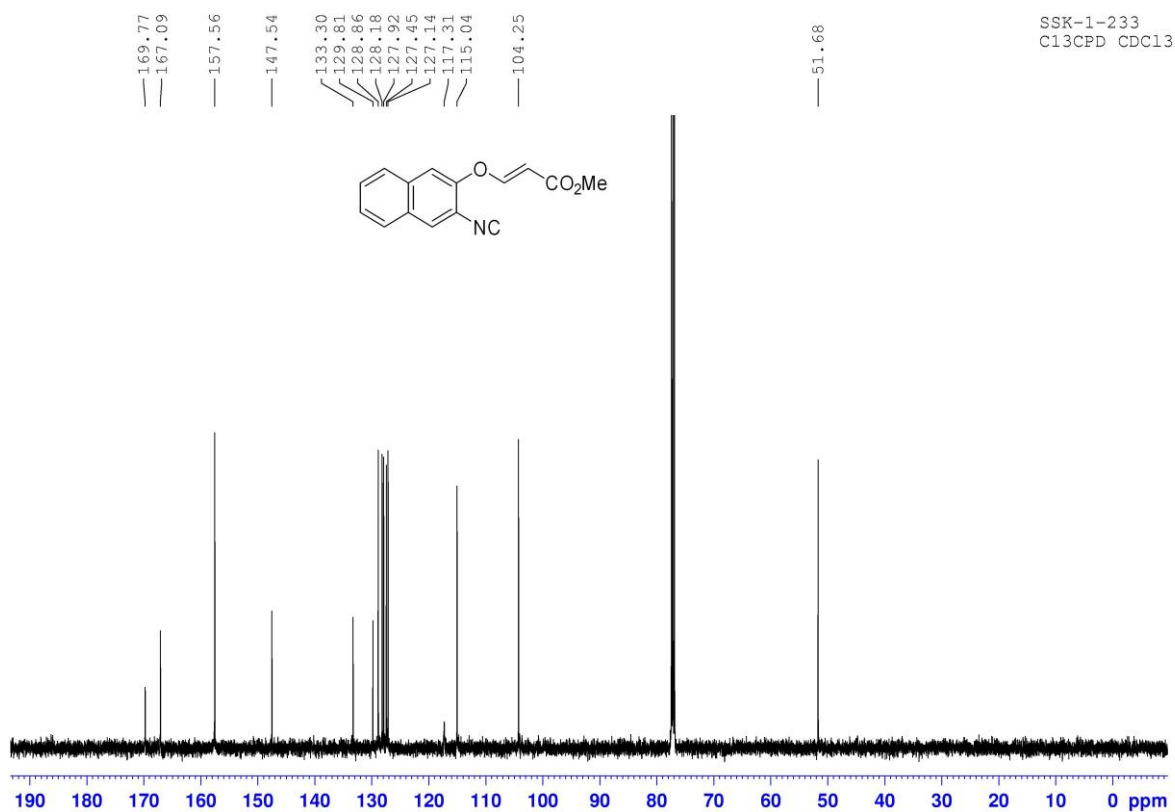

# Compound 1k

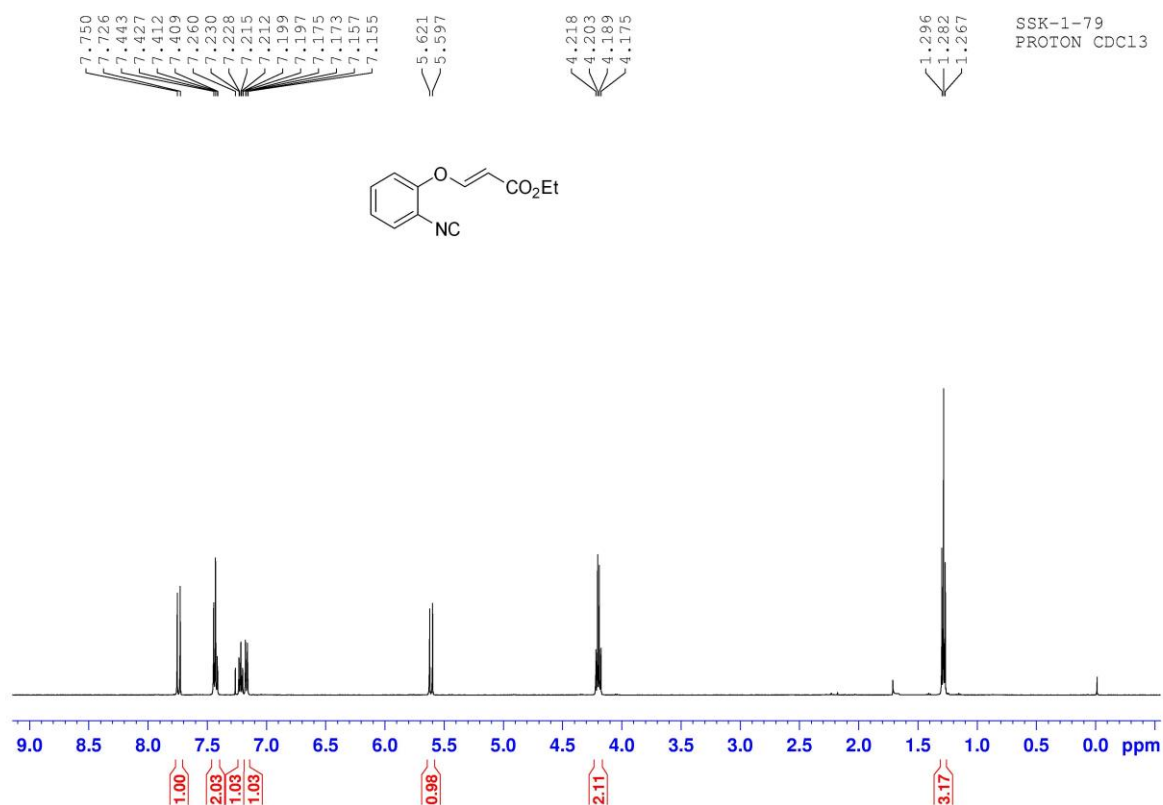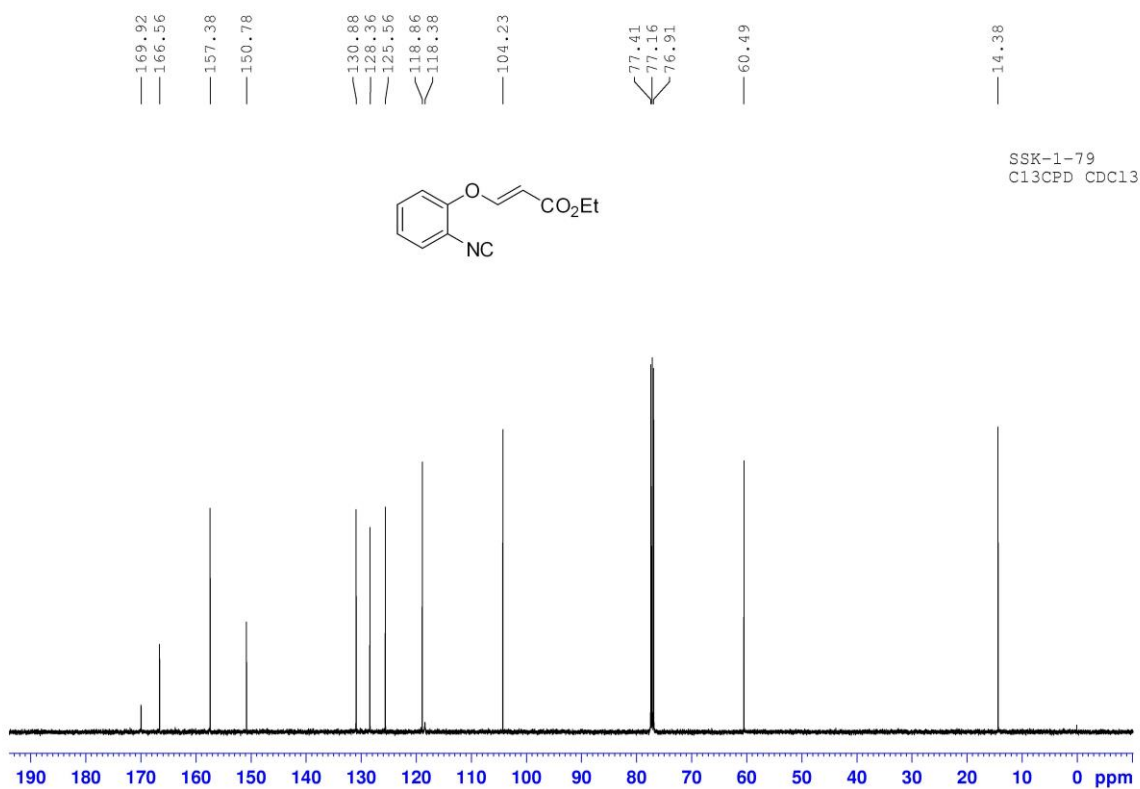

# Compound 11

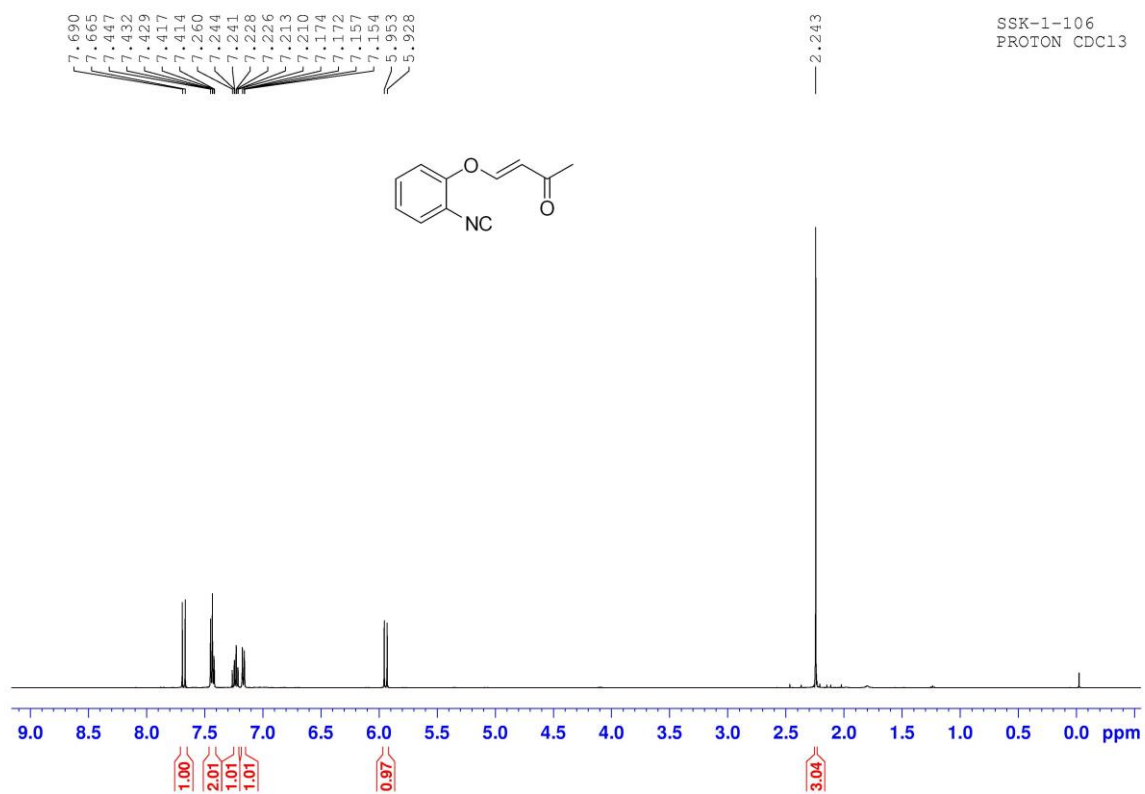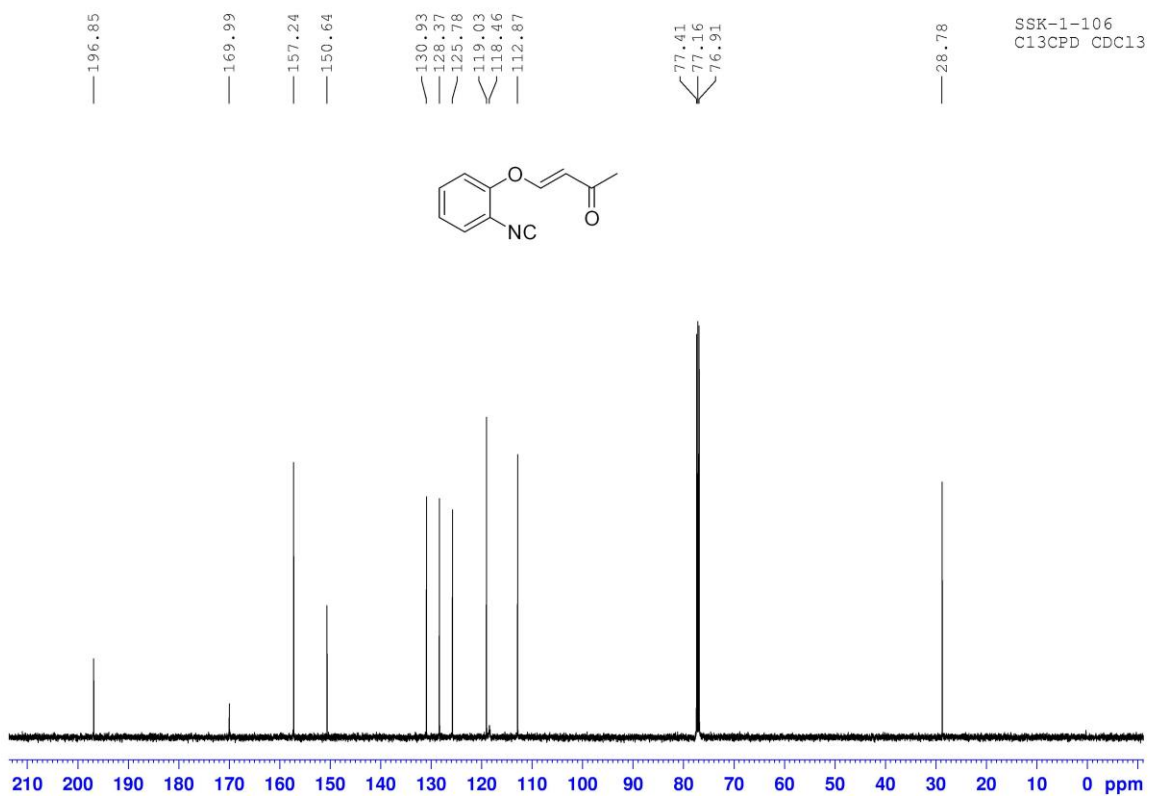

# Compound 1m

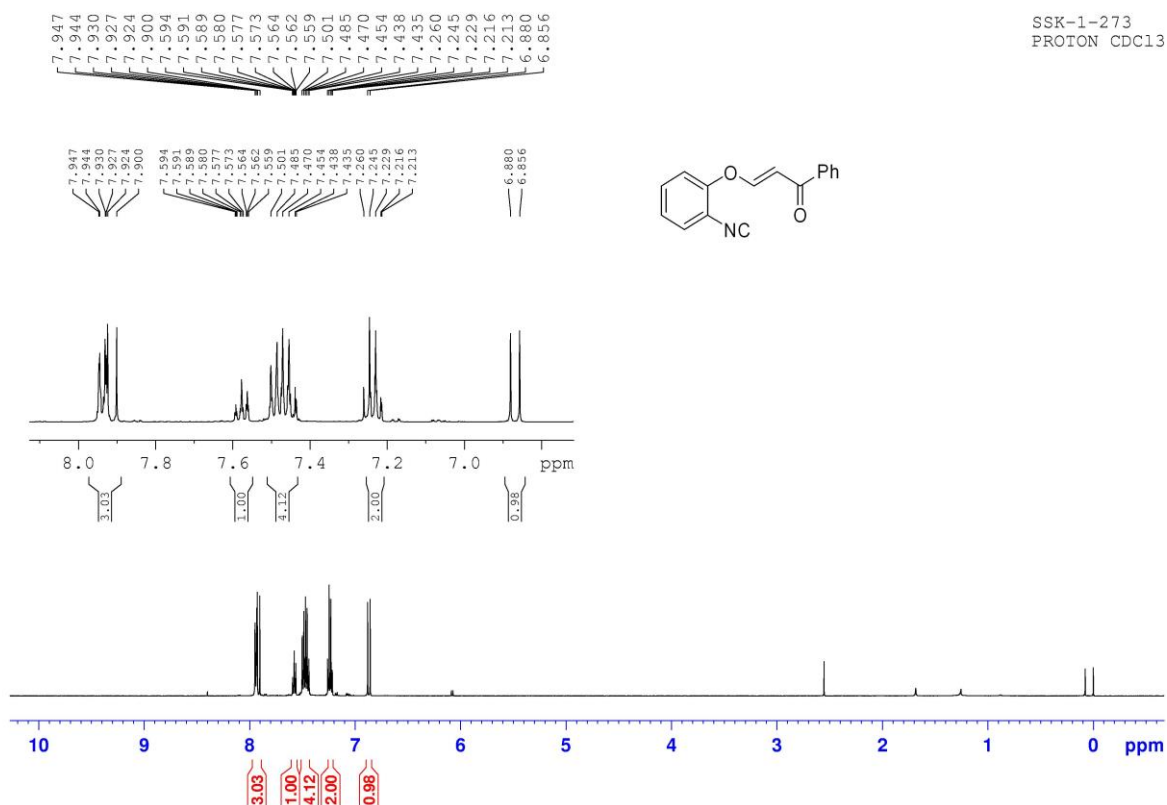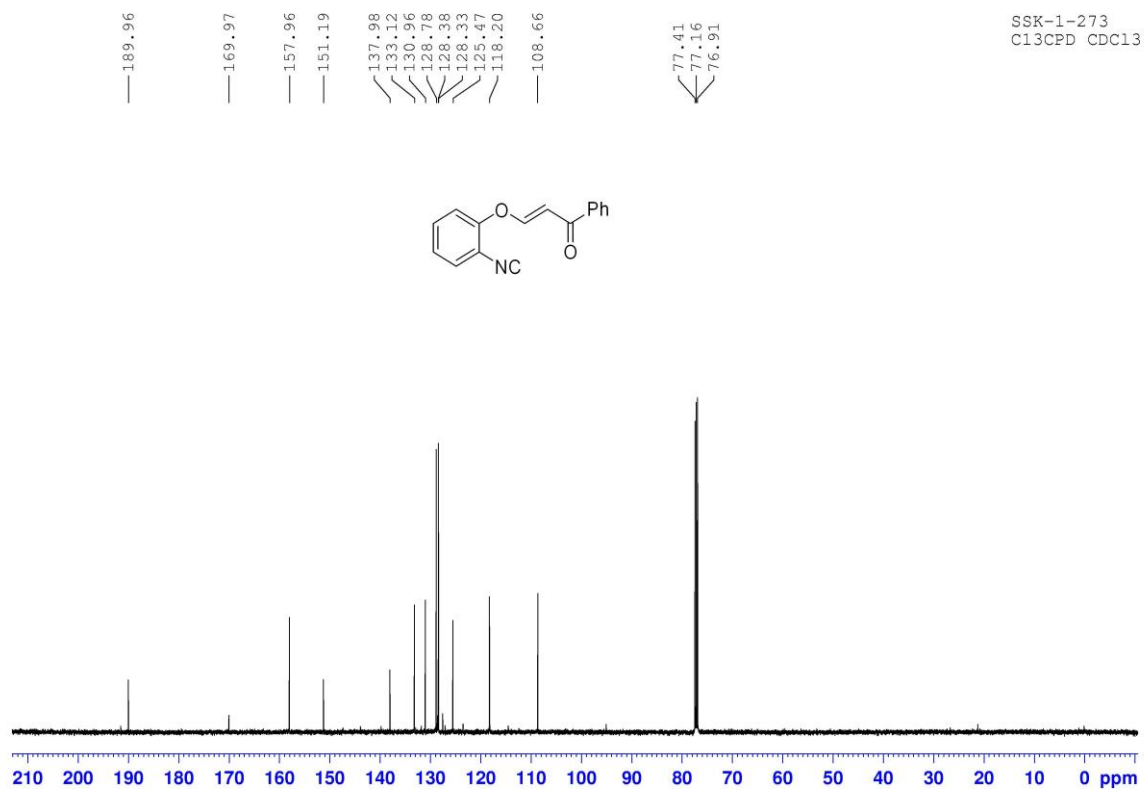

# Compound 1n

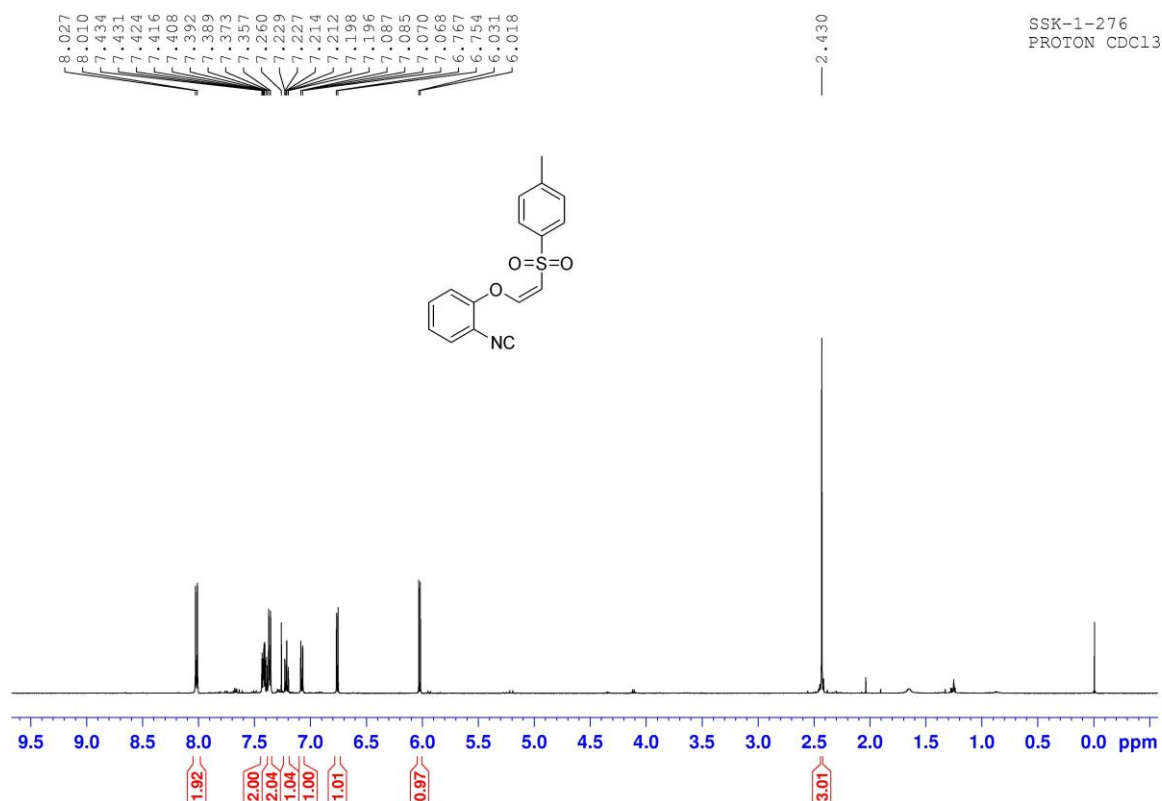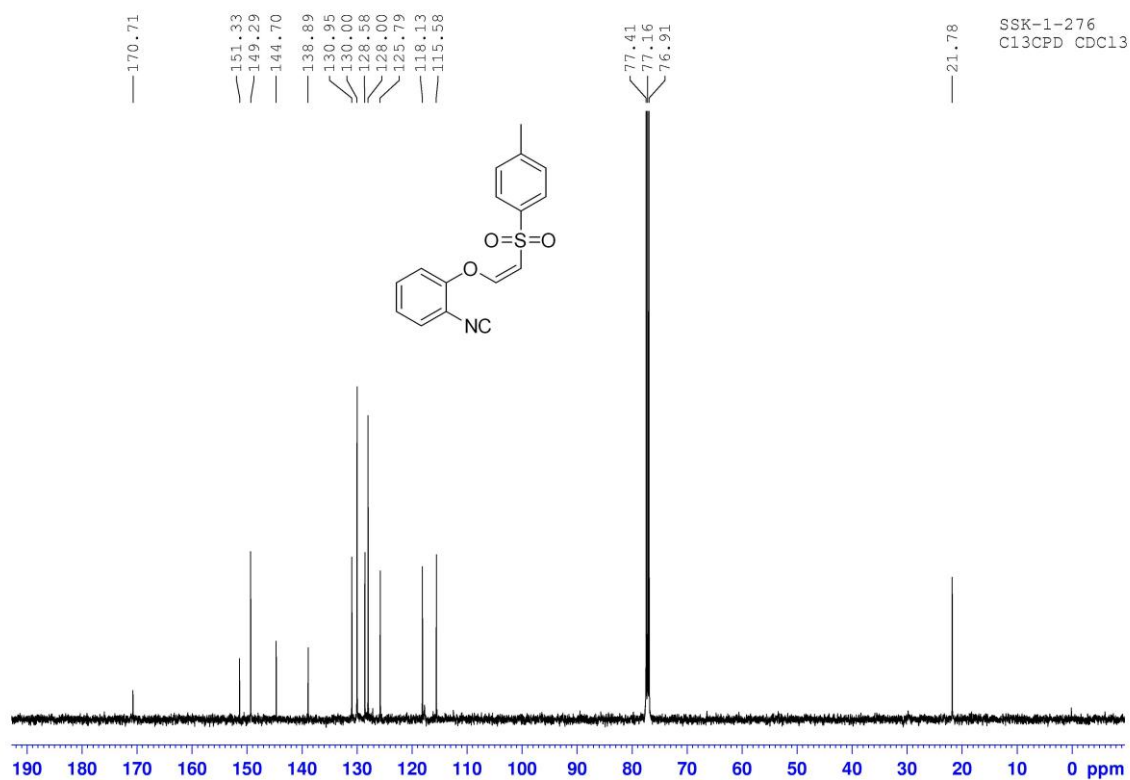

# Compound 1o

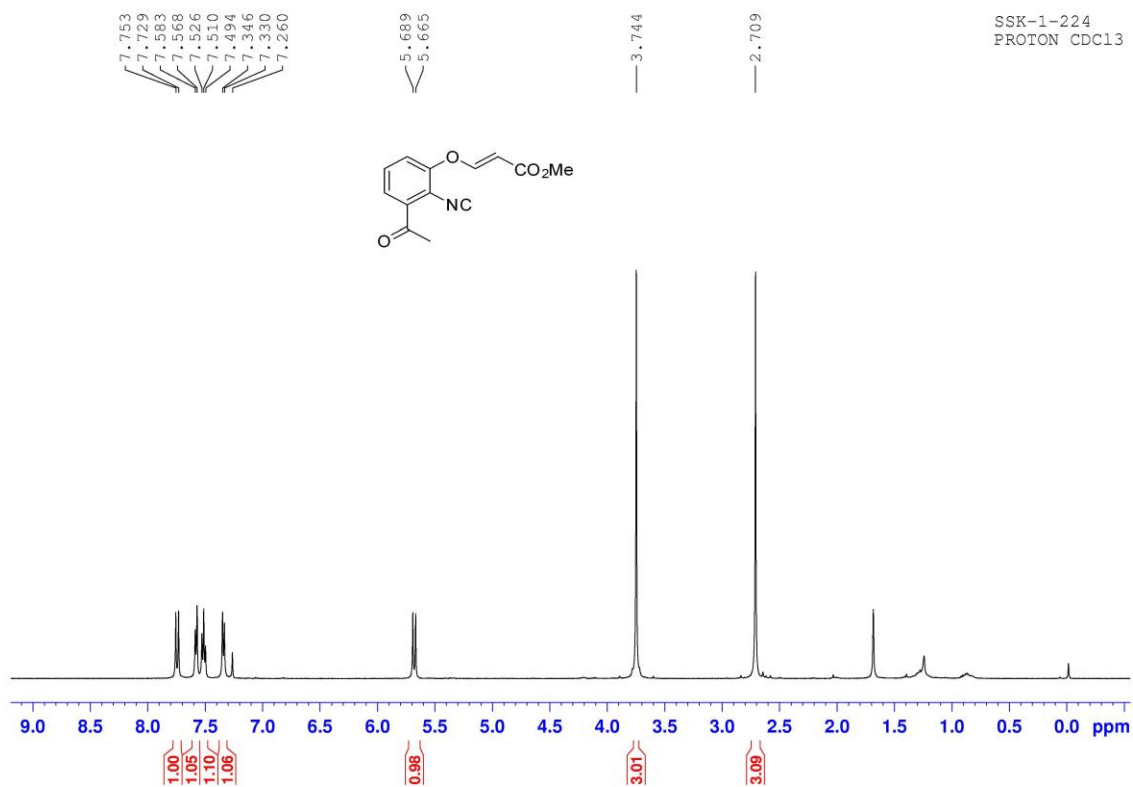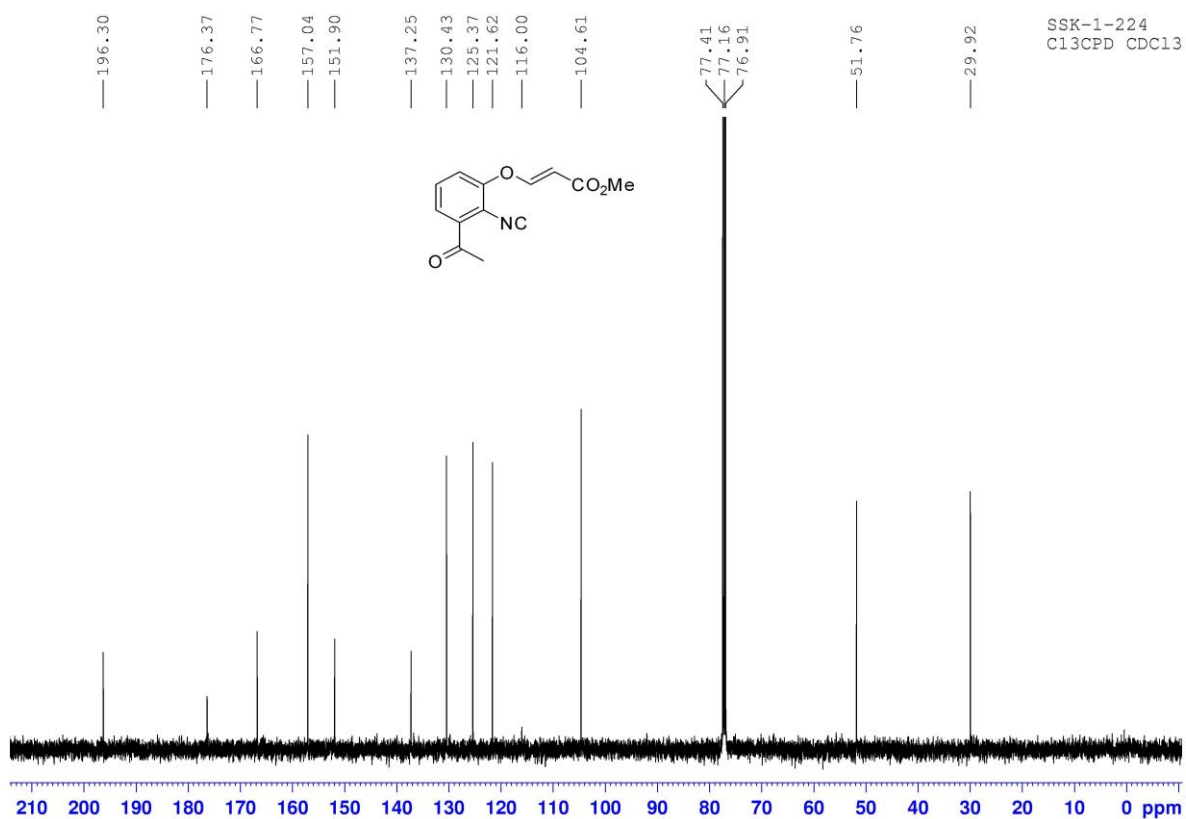

# Compound 1p

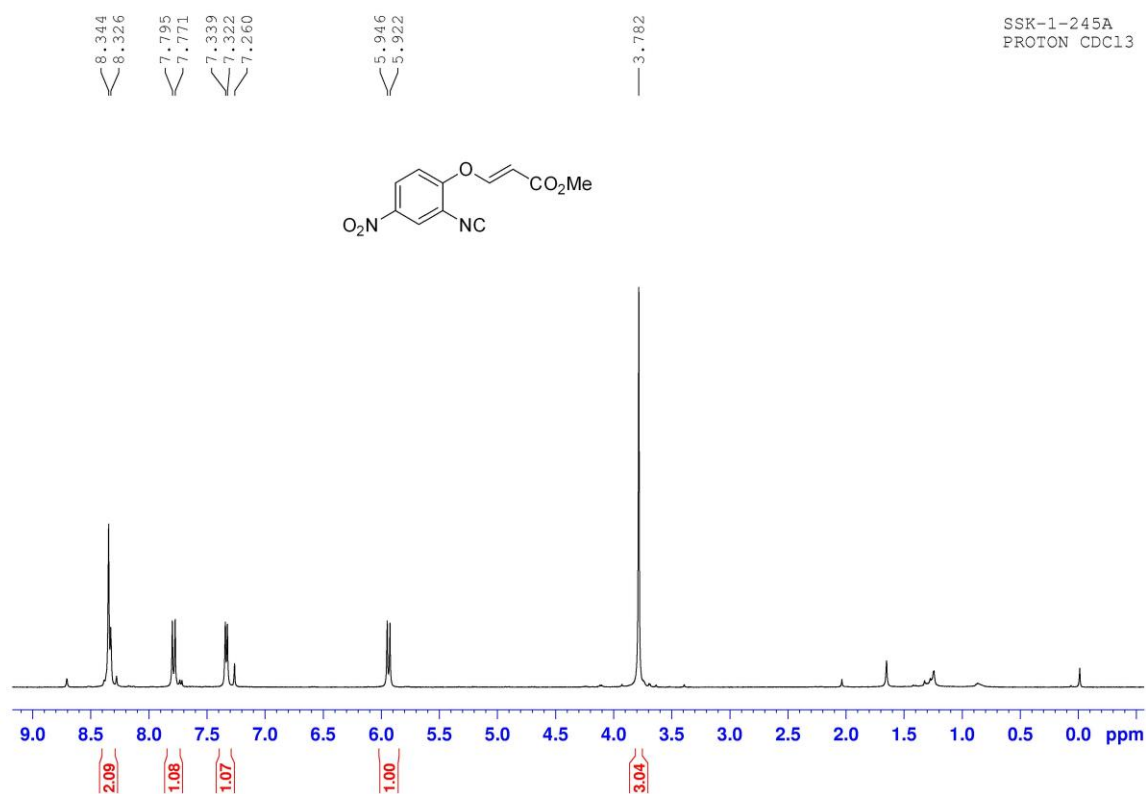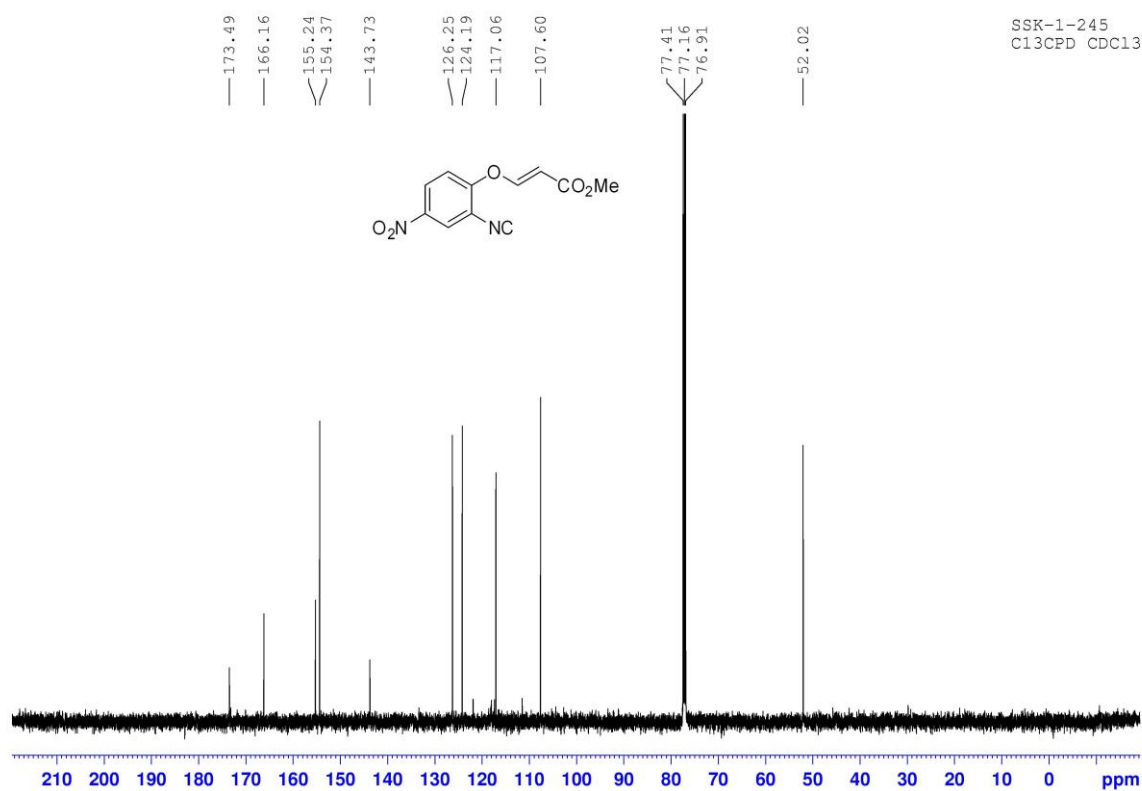

# Compound 1q

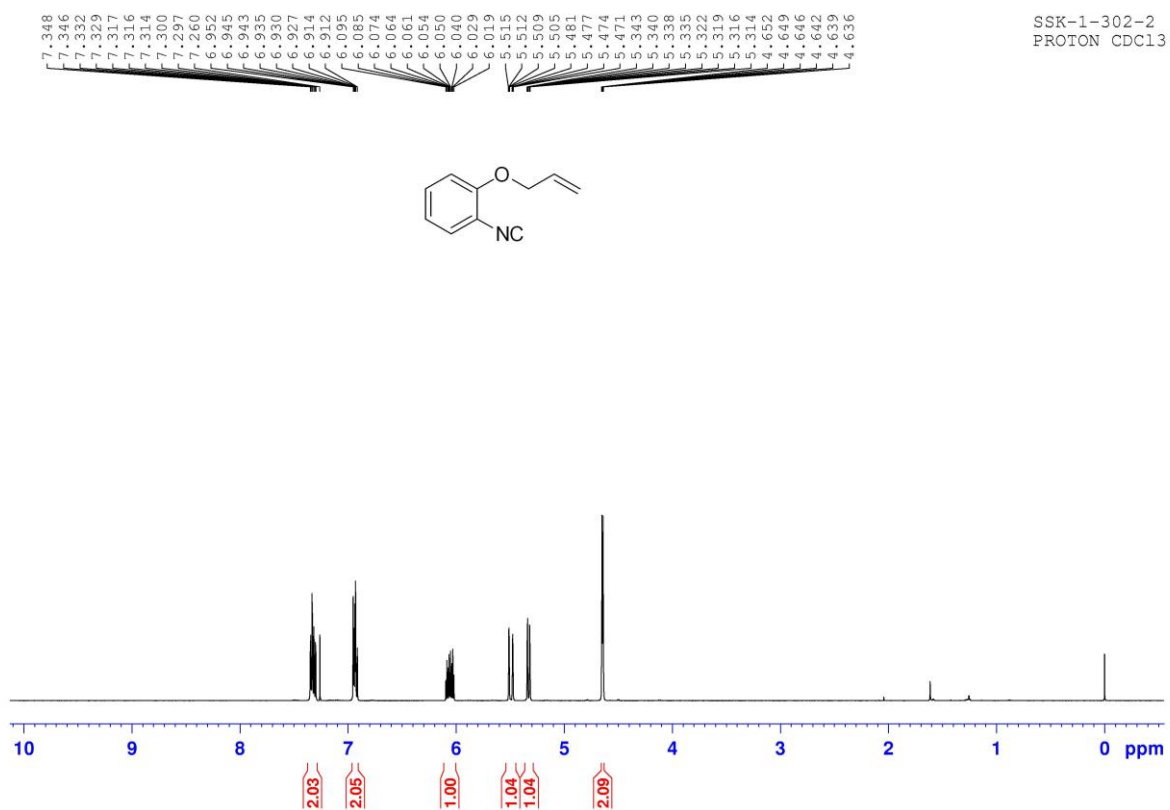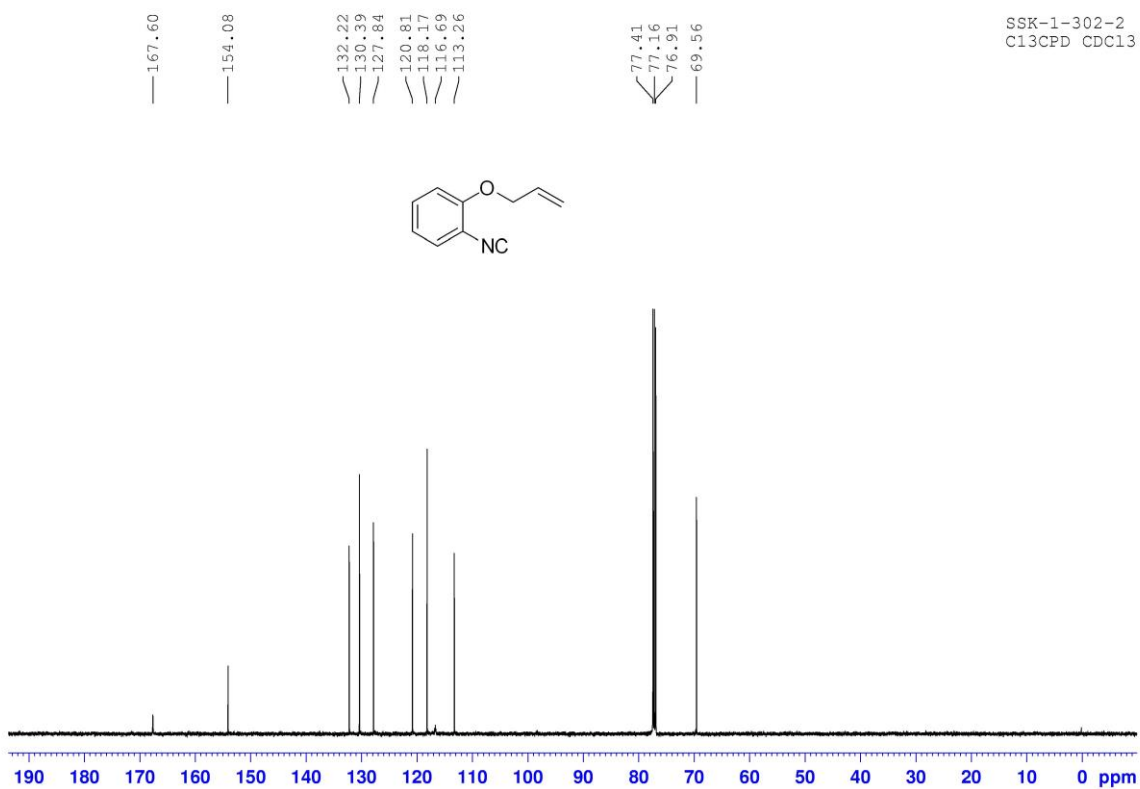

# Compound 3a

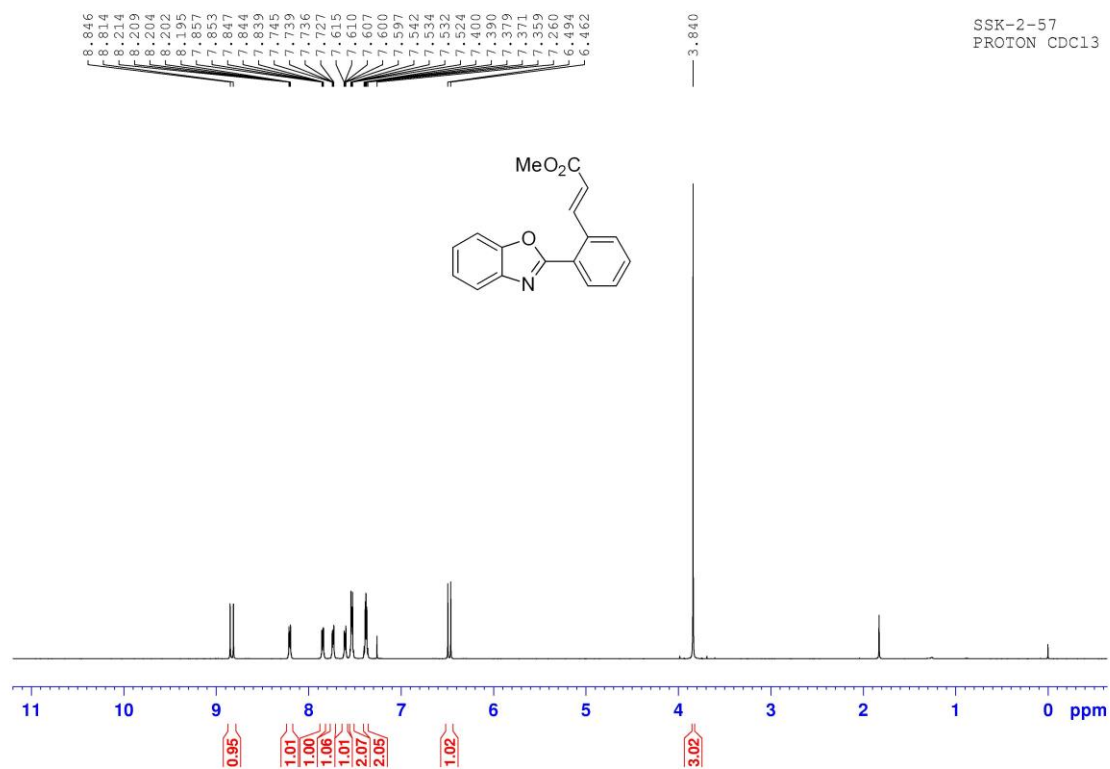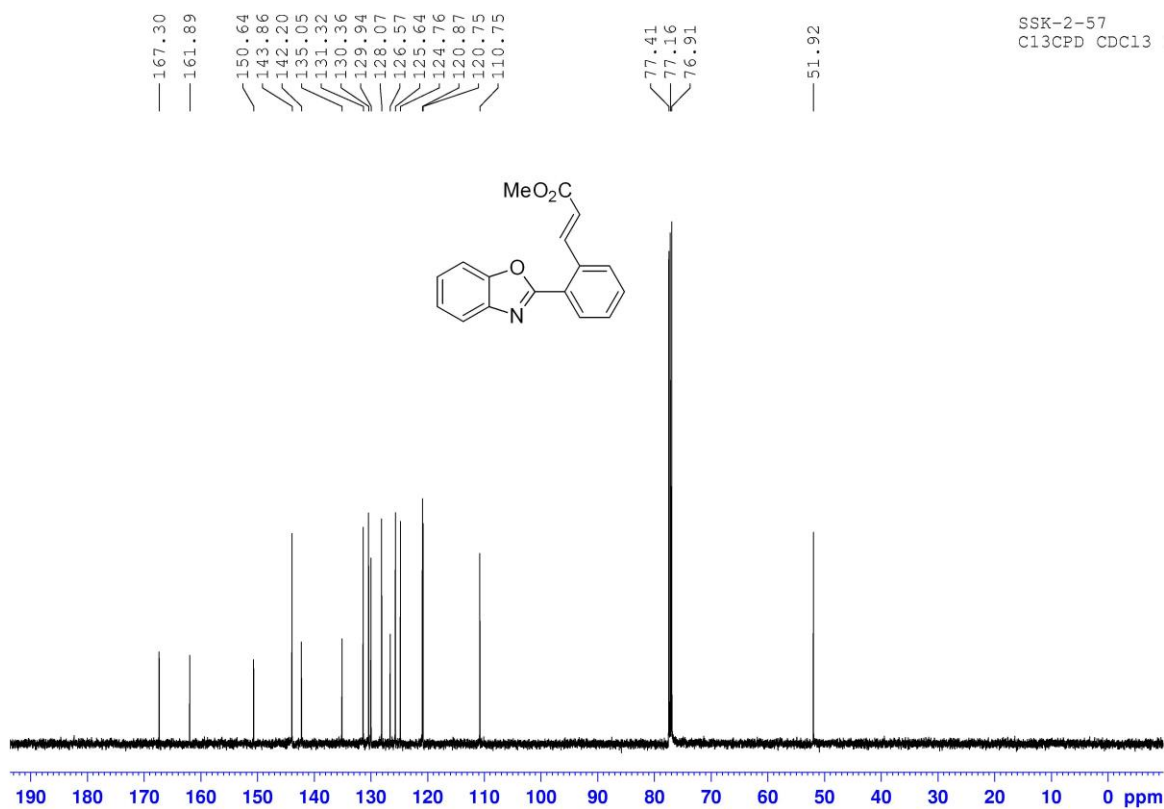

# Compound 3b

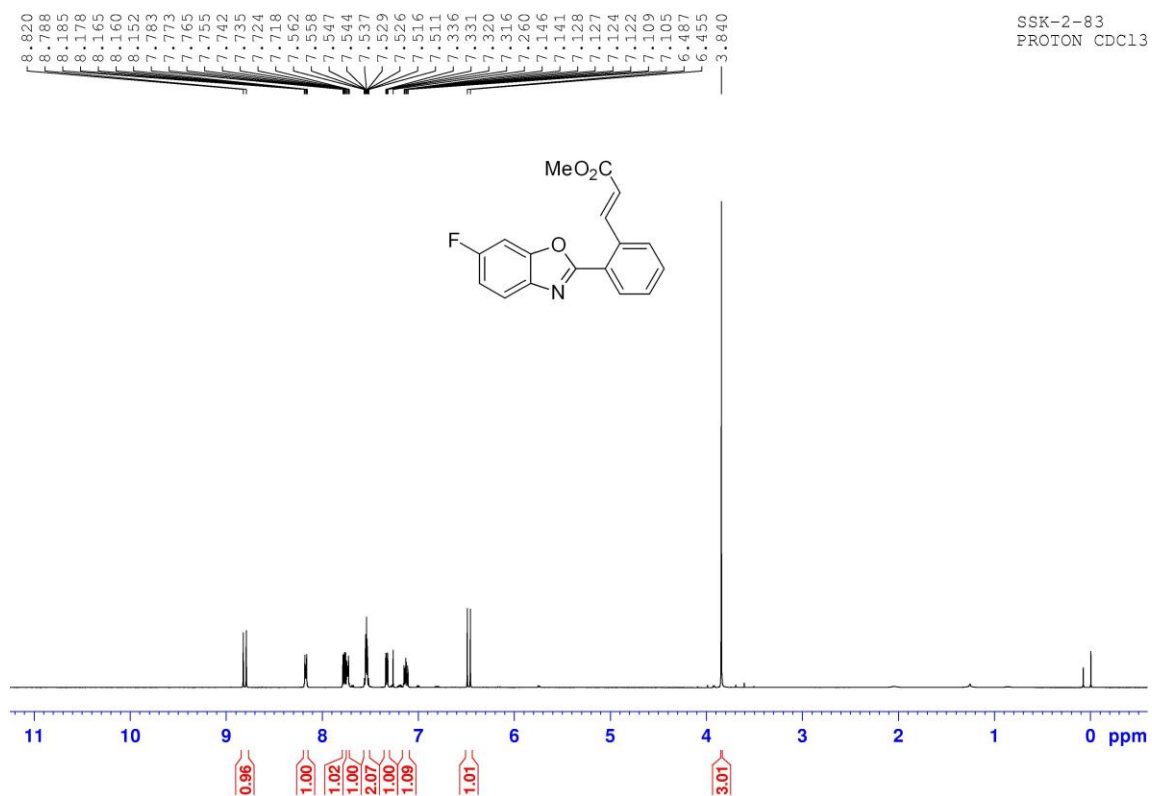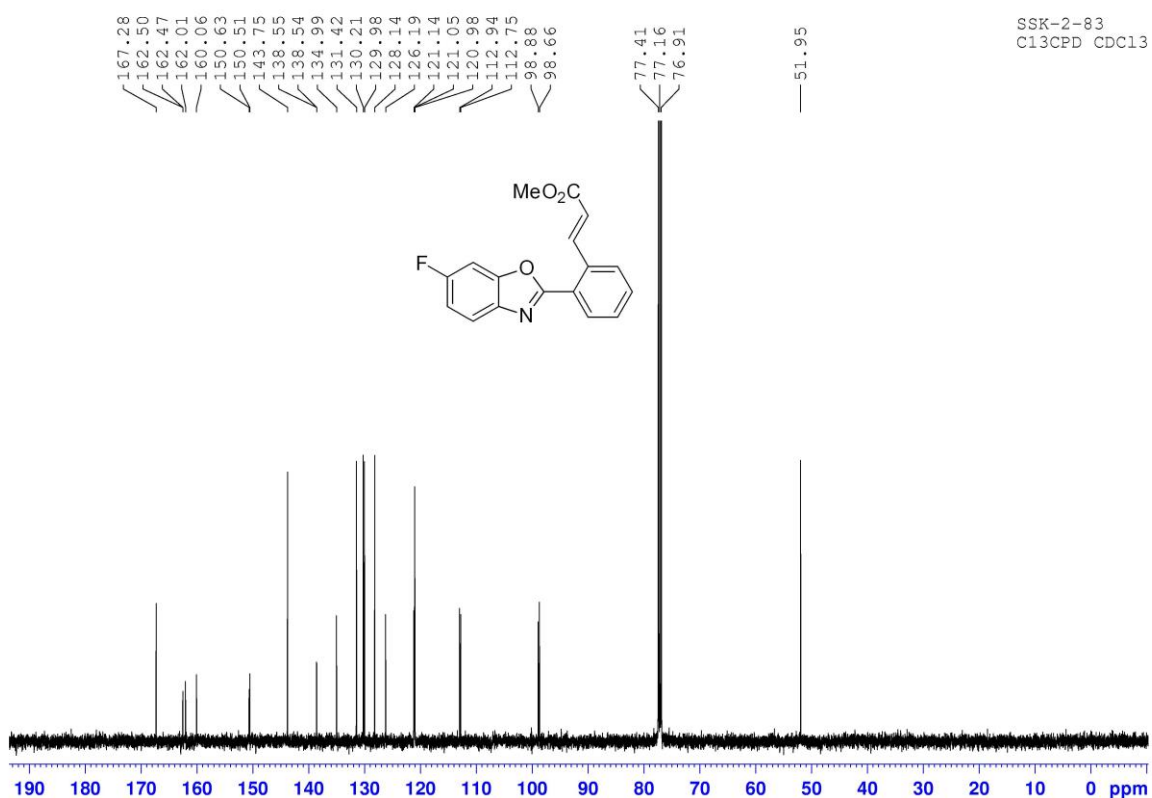

# Compound **3c**

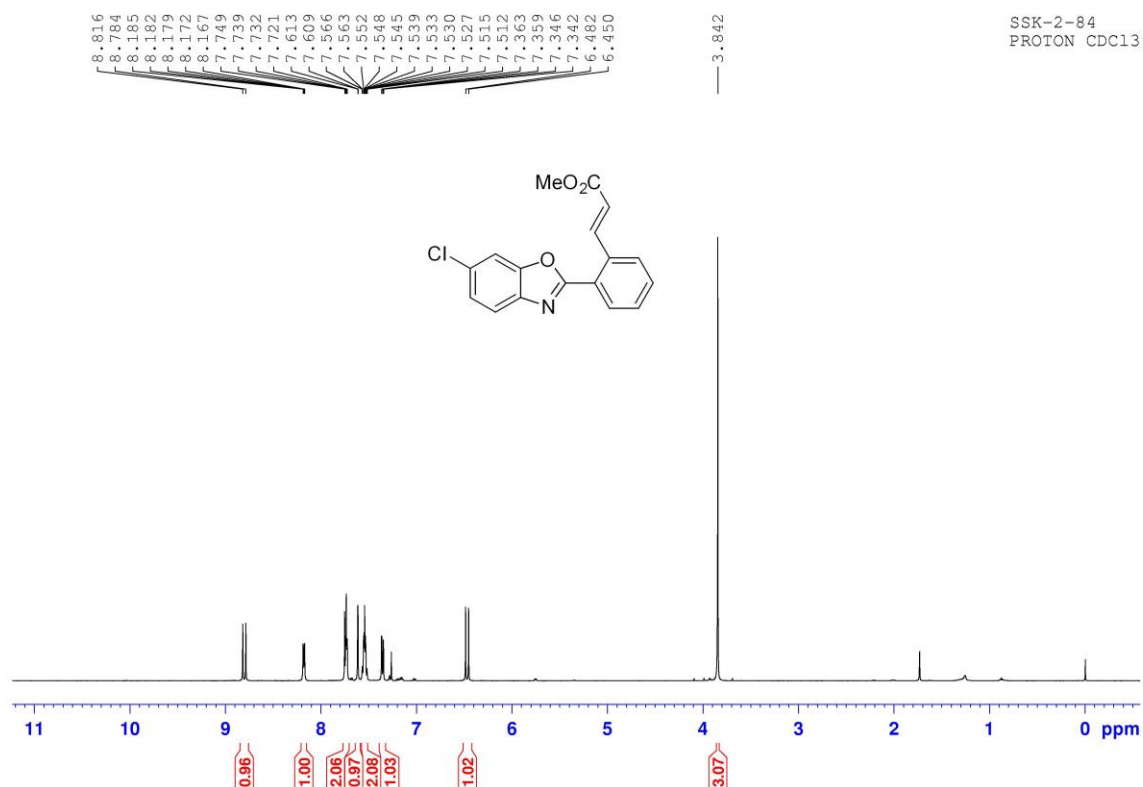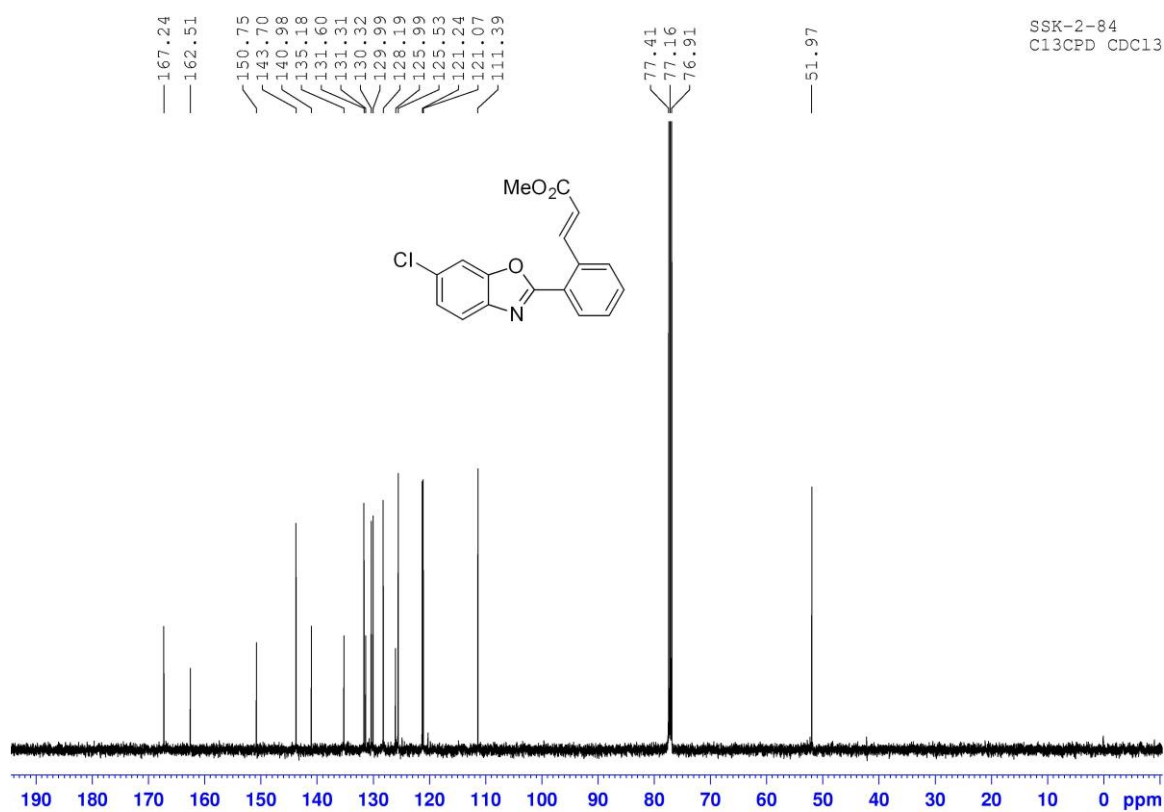

# Compound **3d**

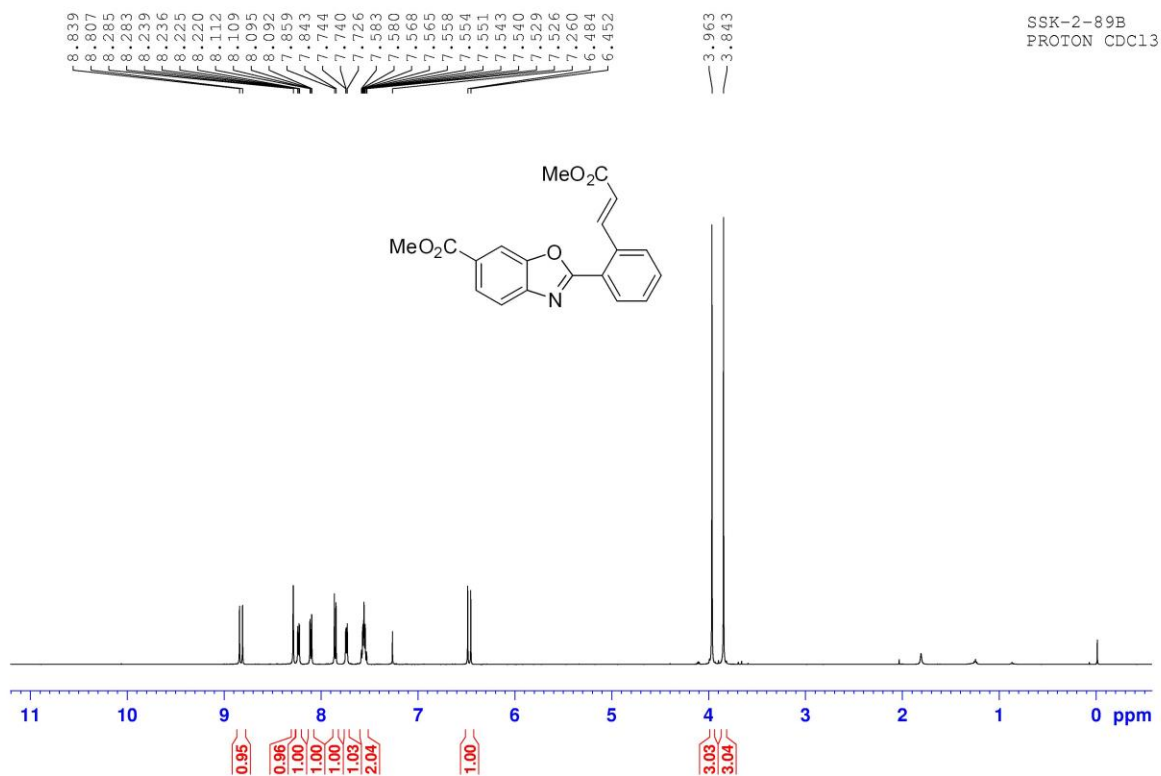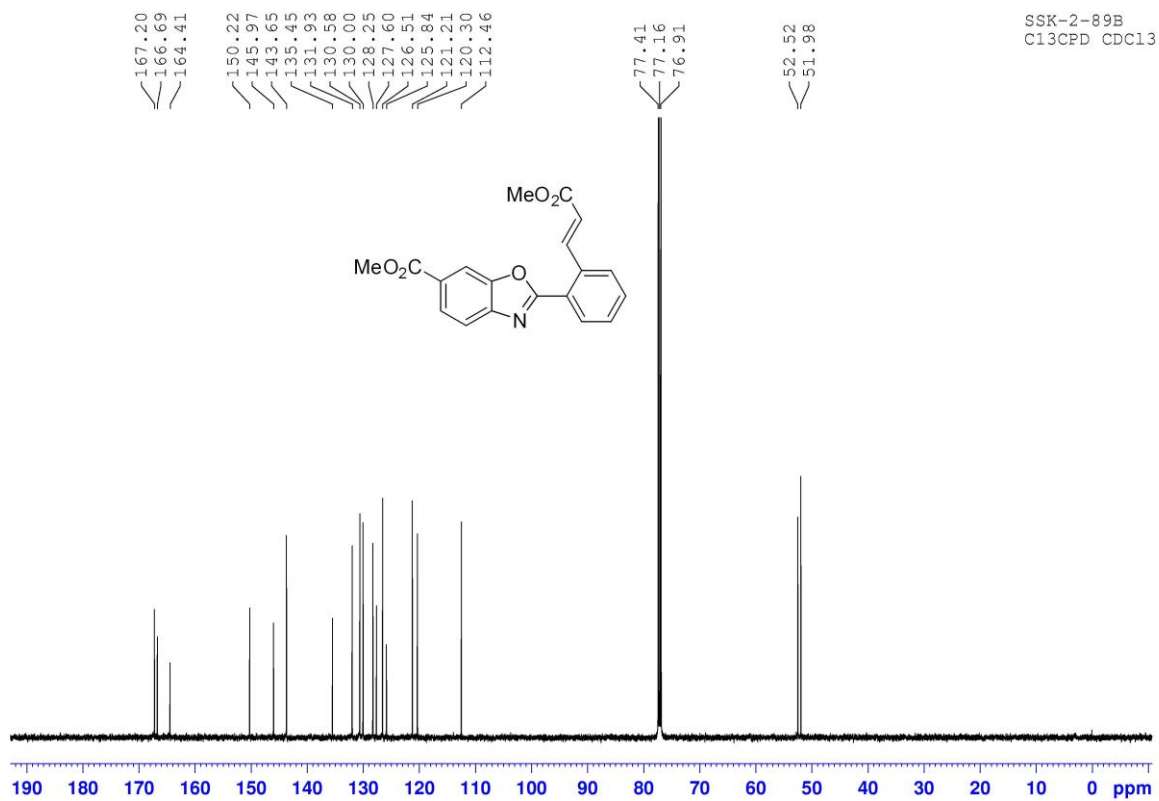

# Compound 3e

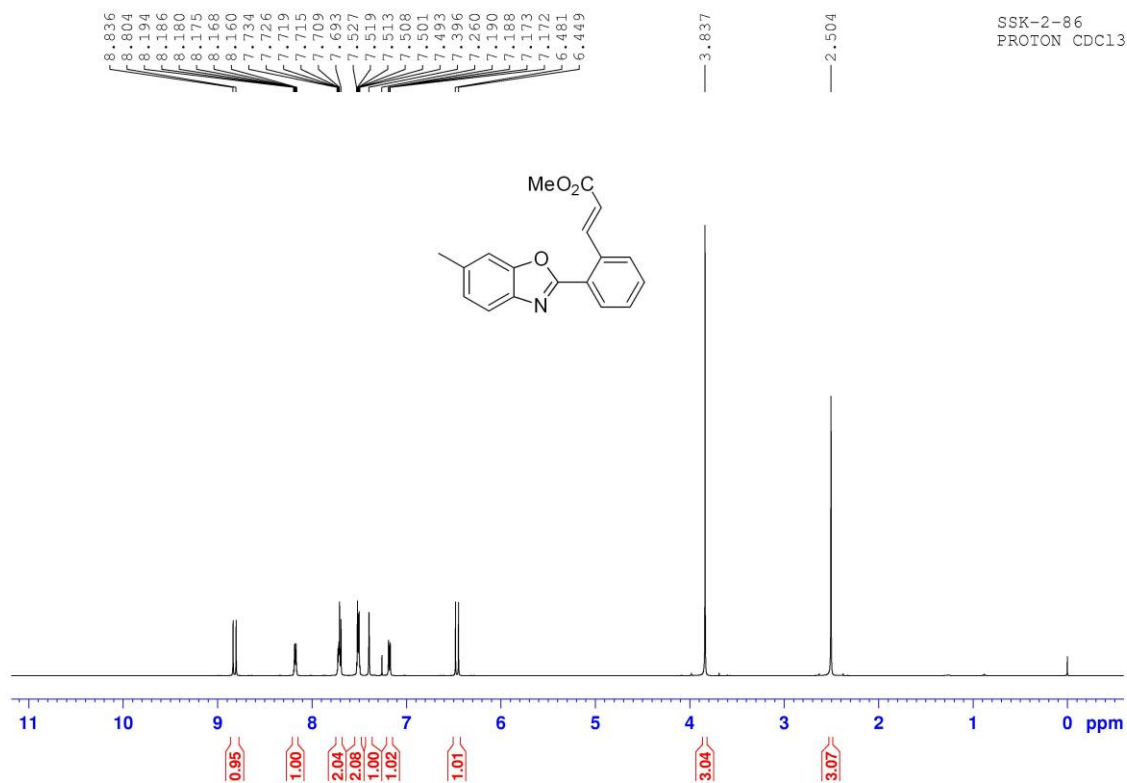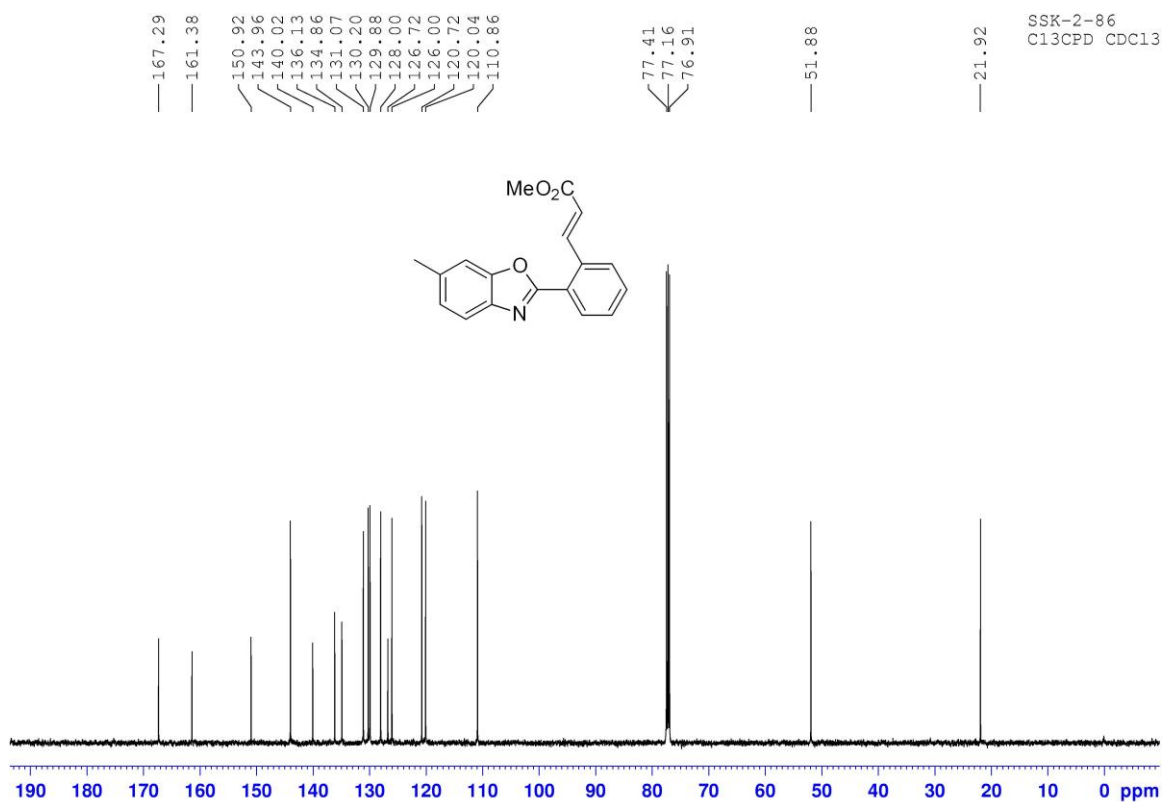

# Compound **3f**

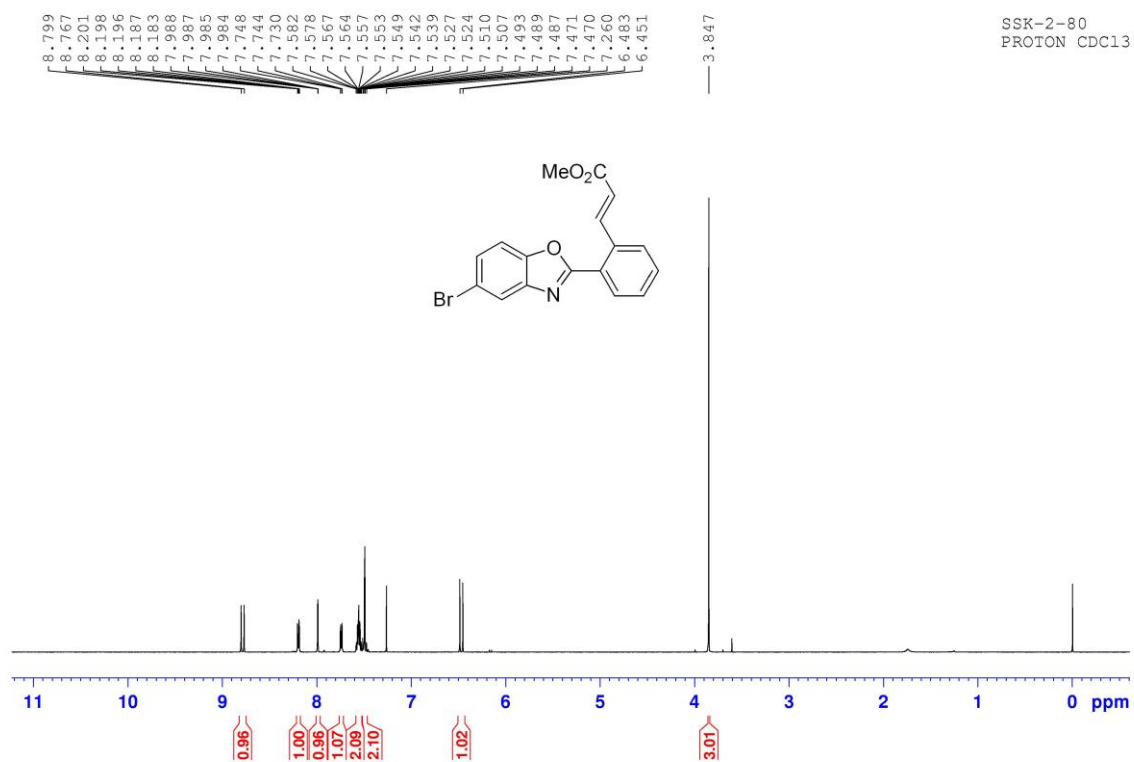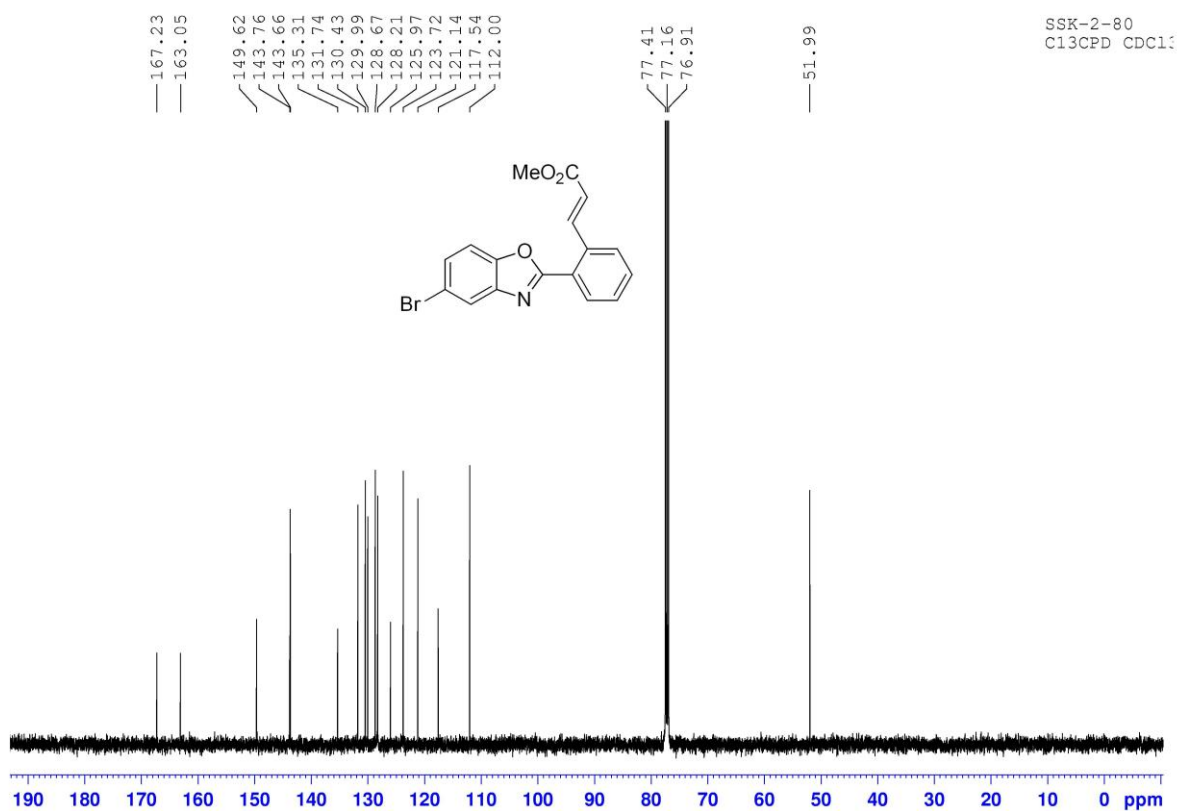

# Compound 3g

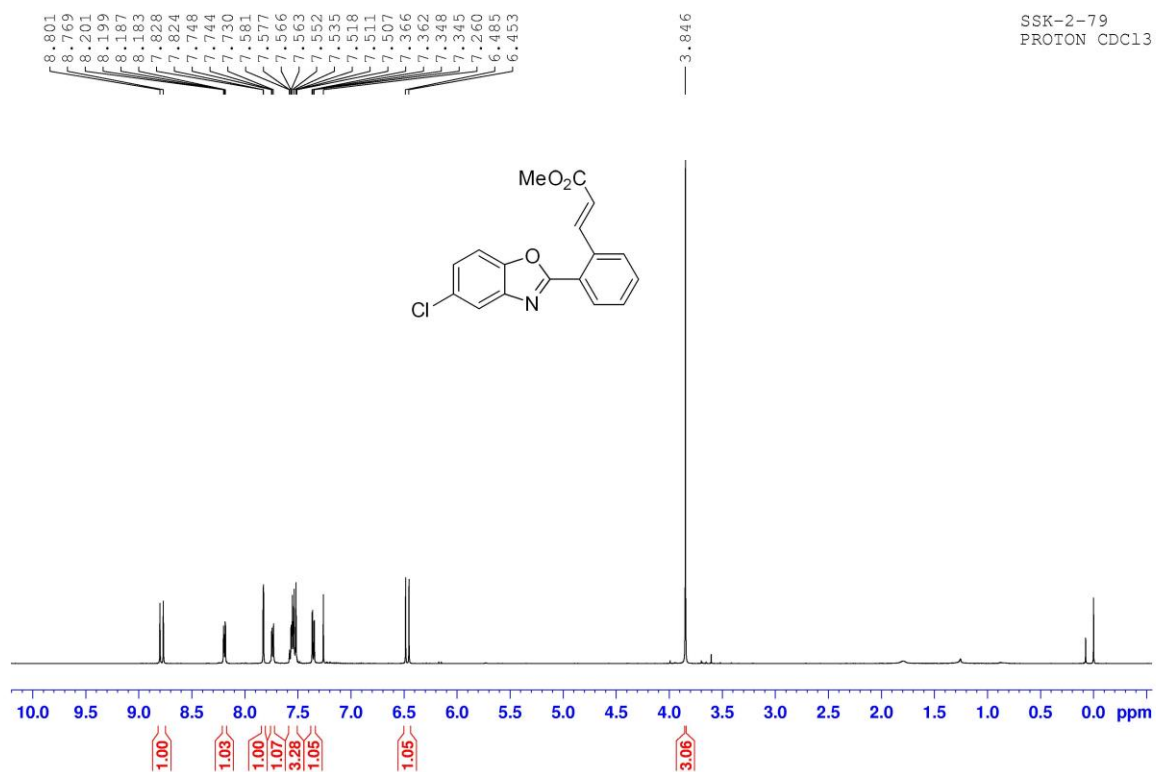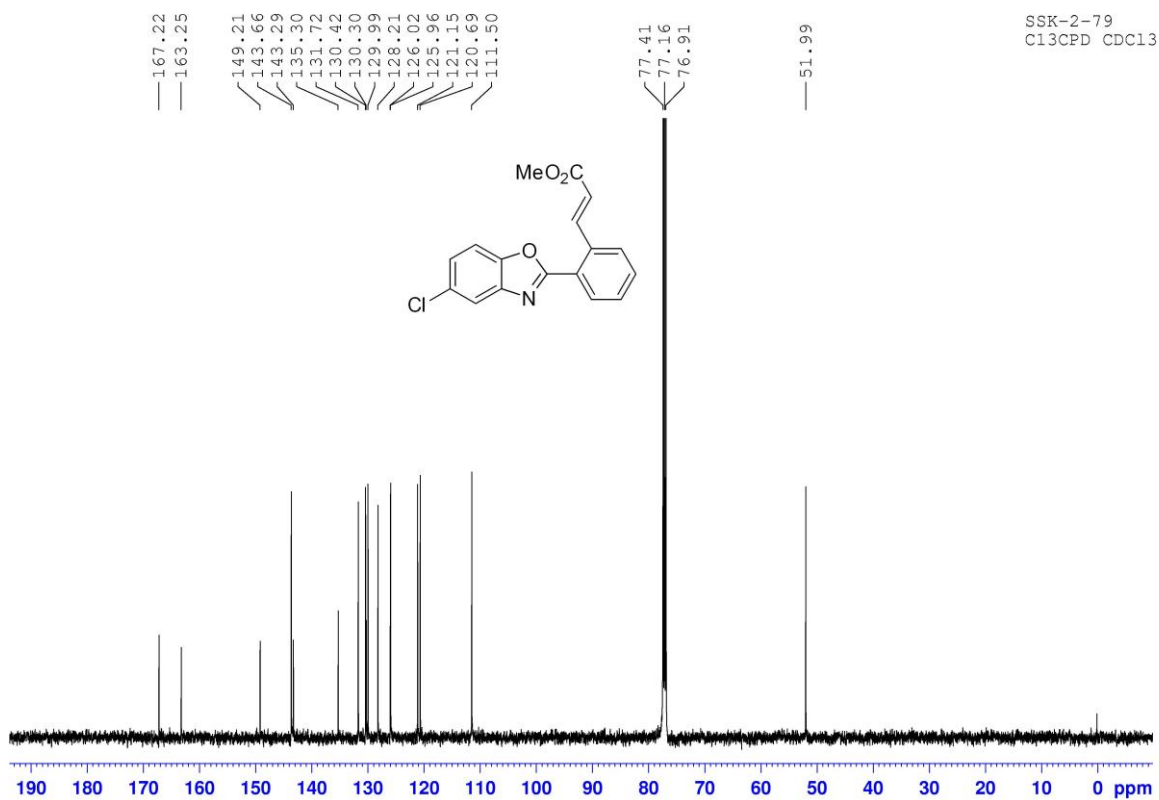

# Compound 3h

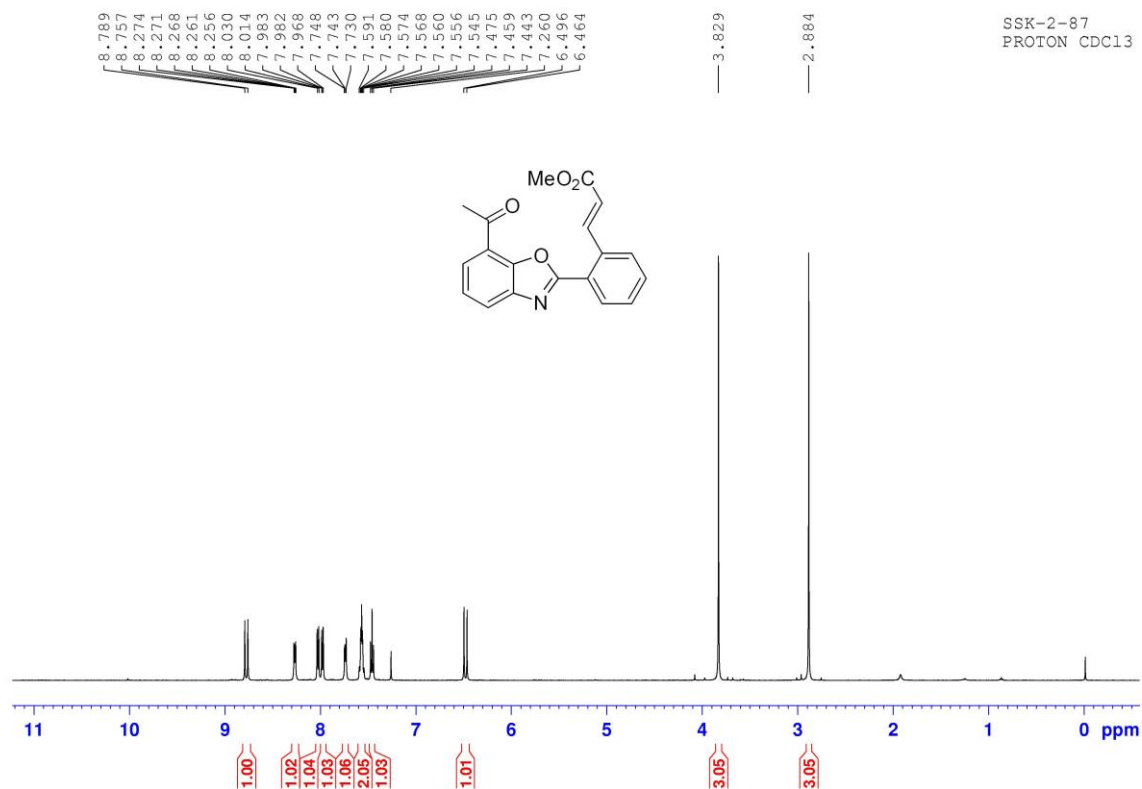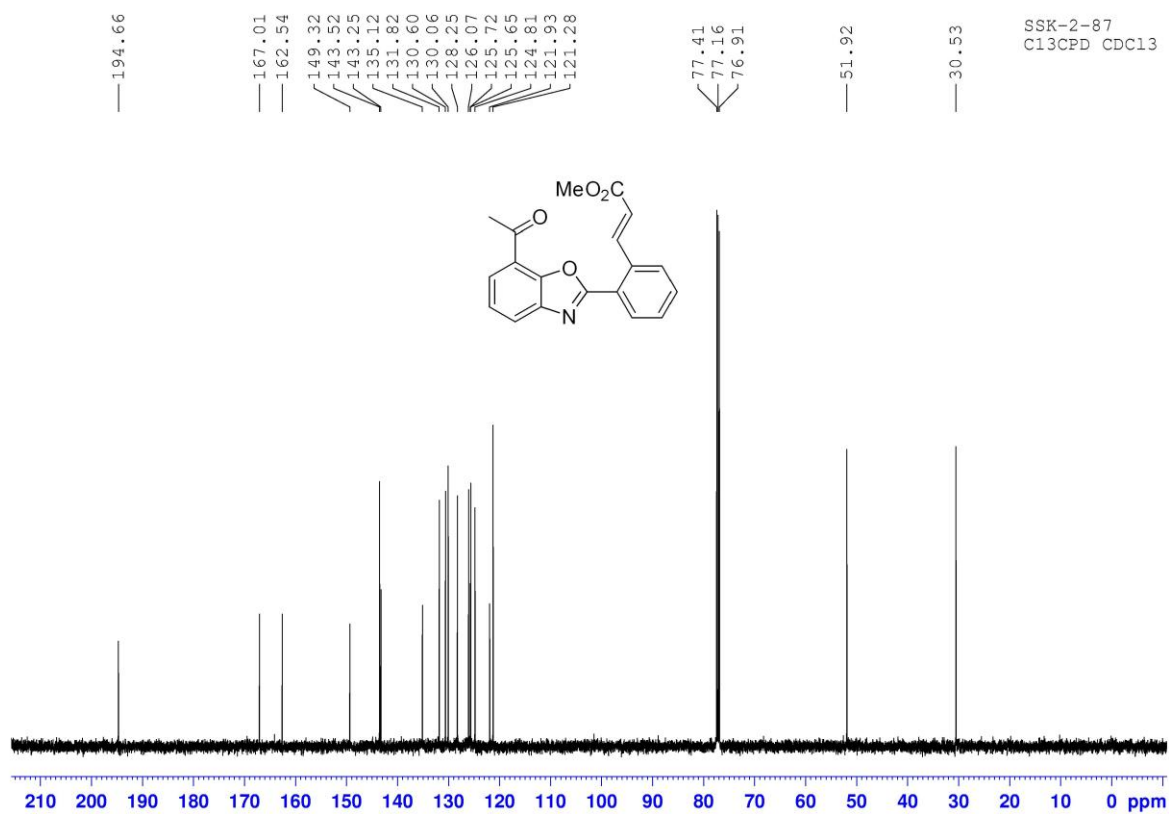

# Compound **3i**

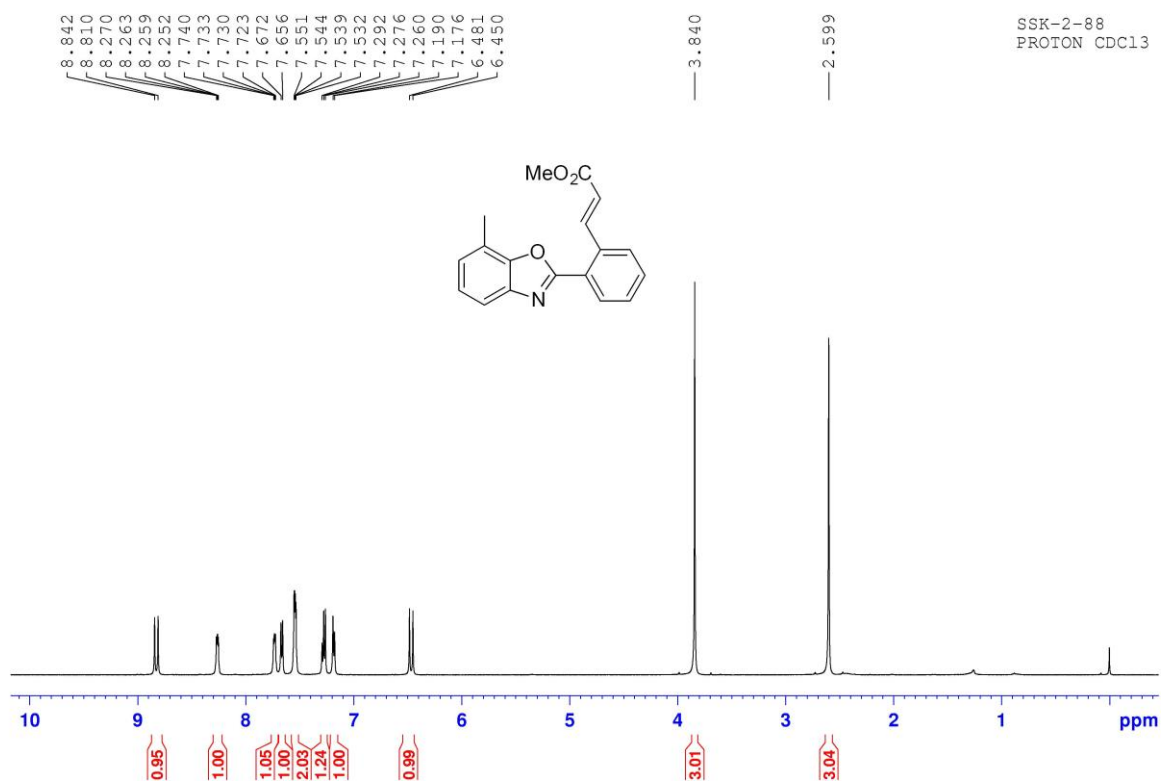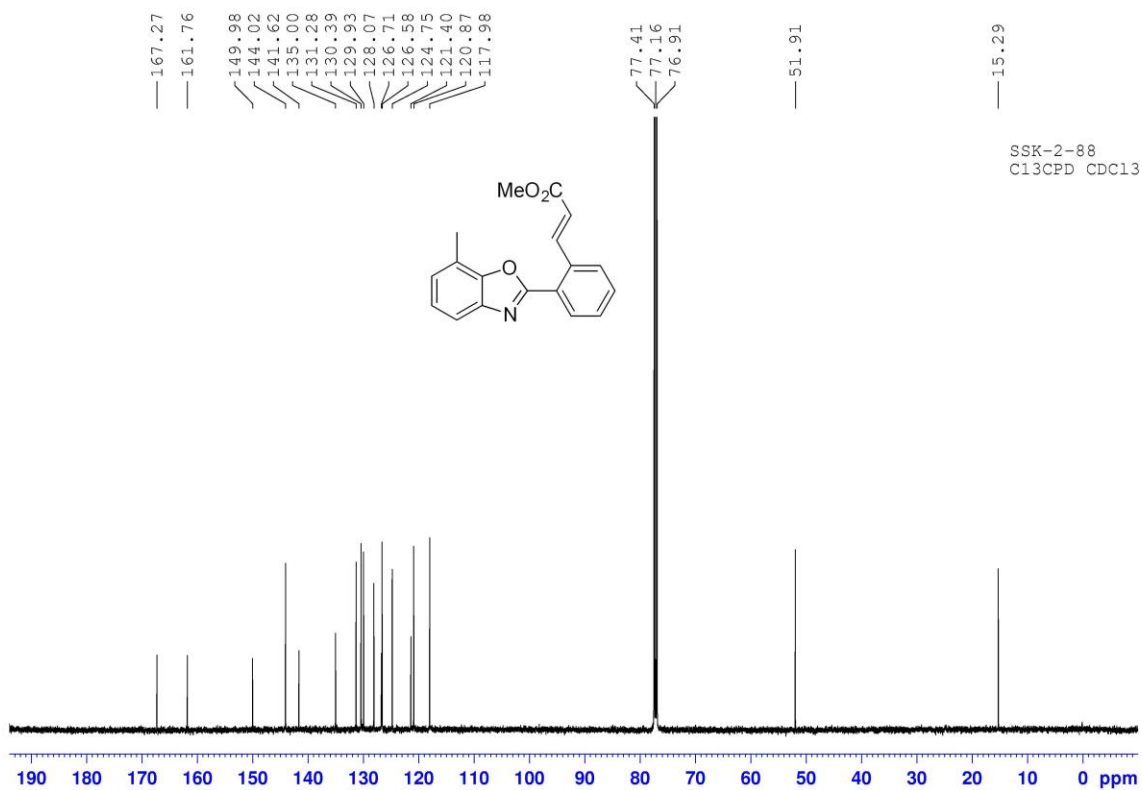

# Compound 3j

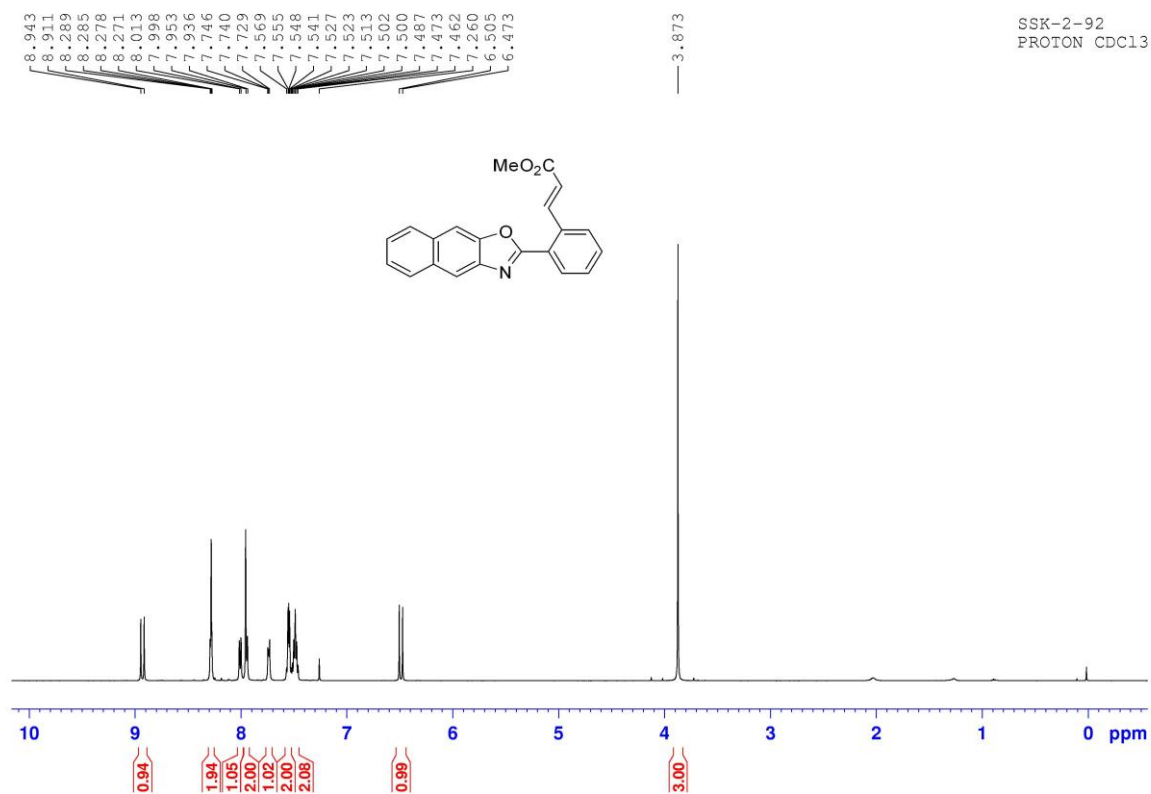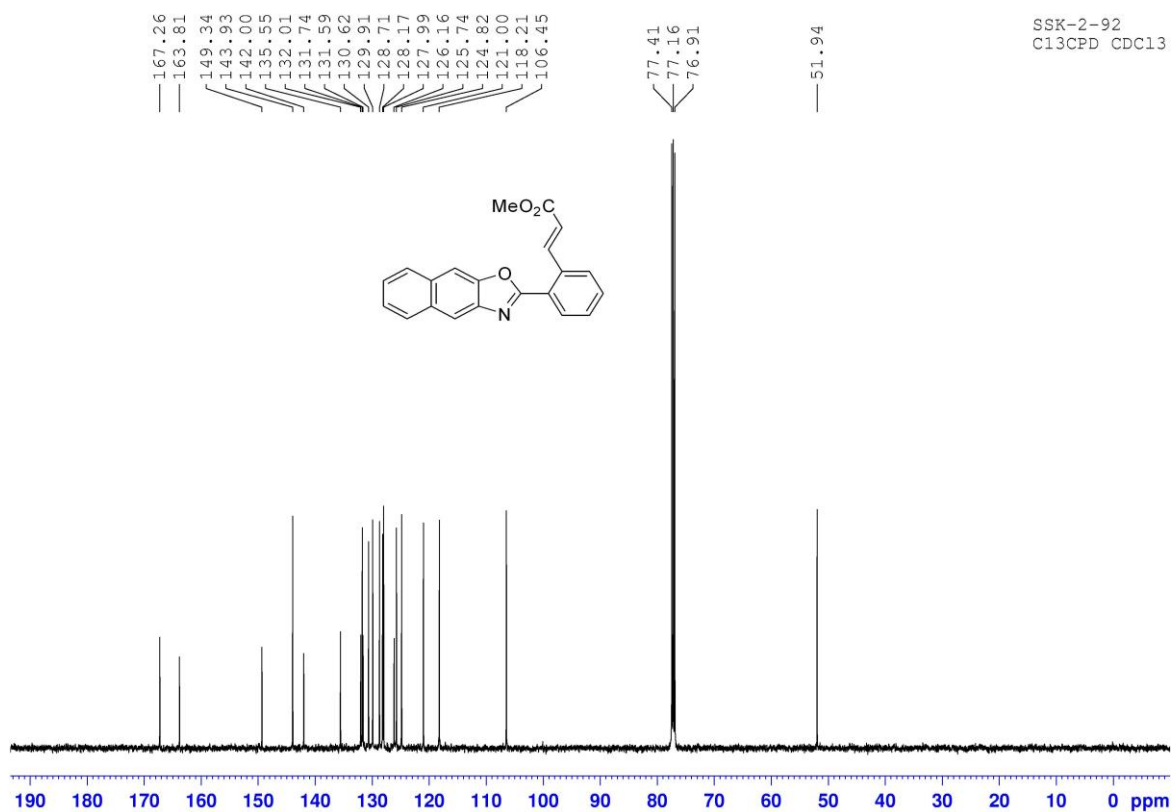

# Compound **3k**

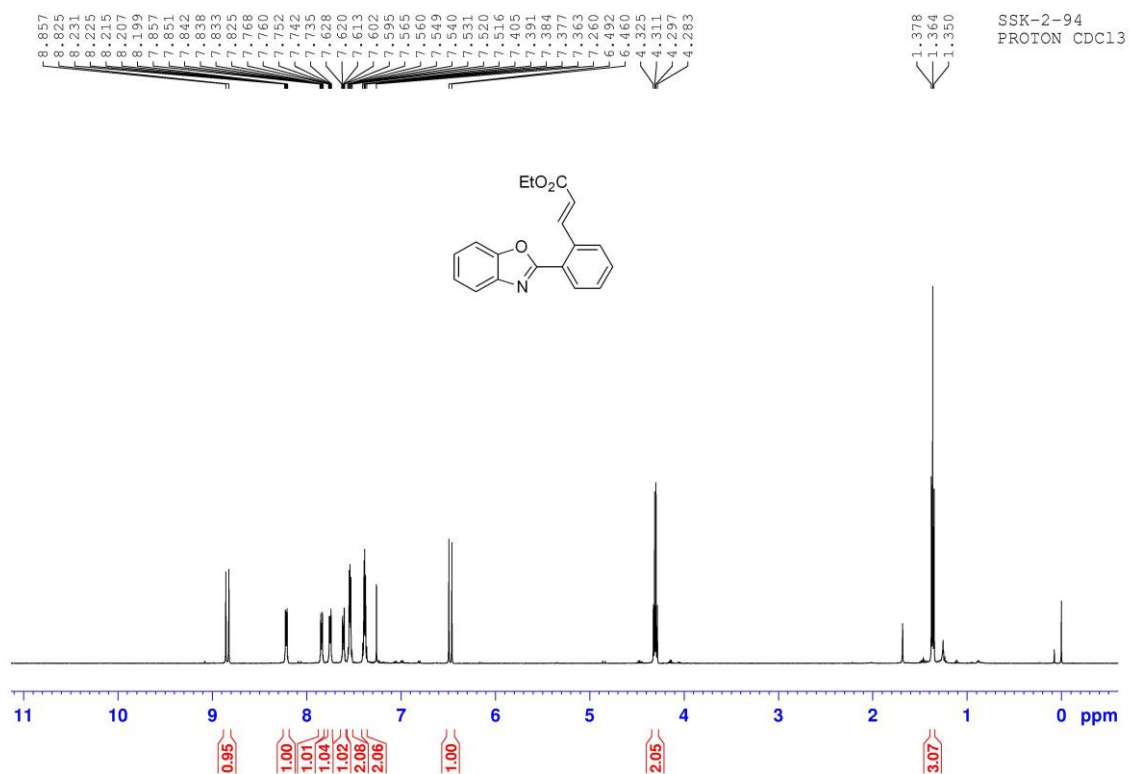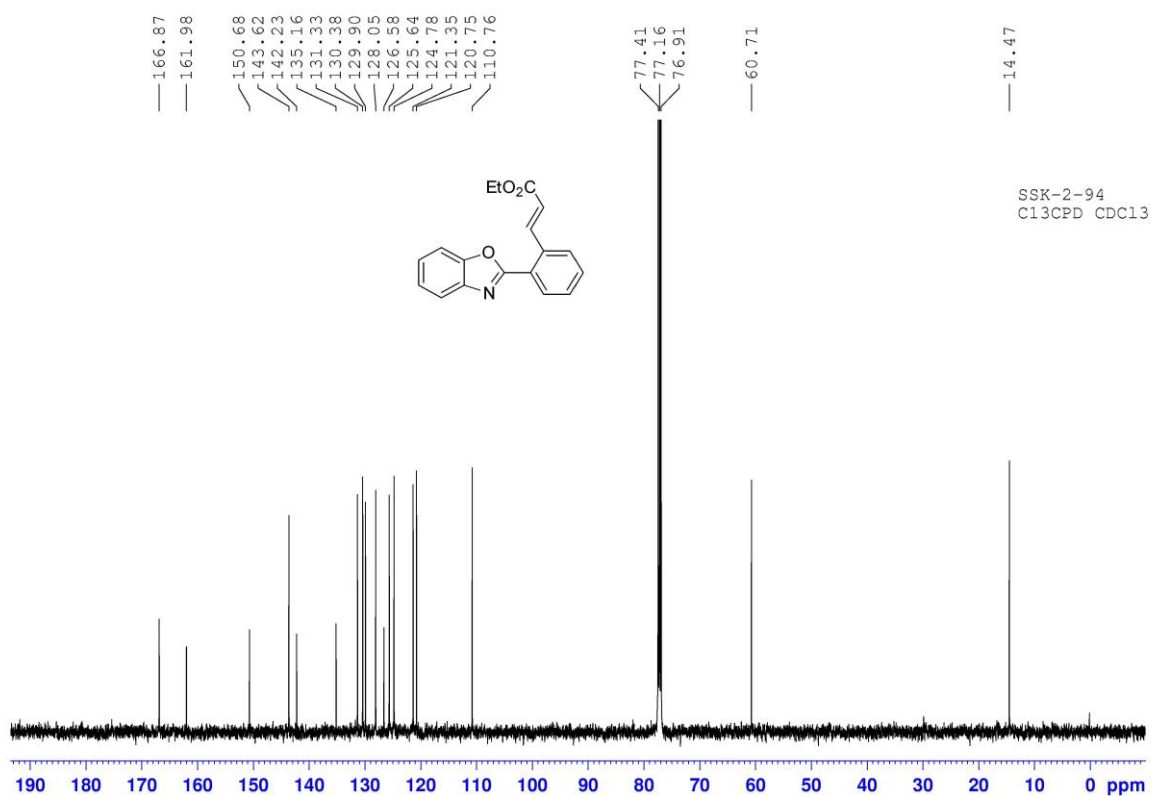

# Compound 31

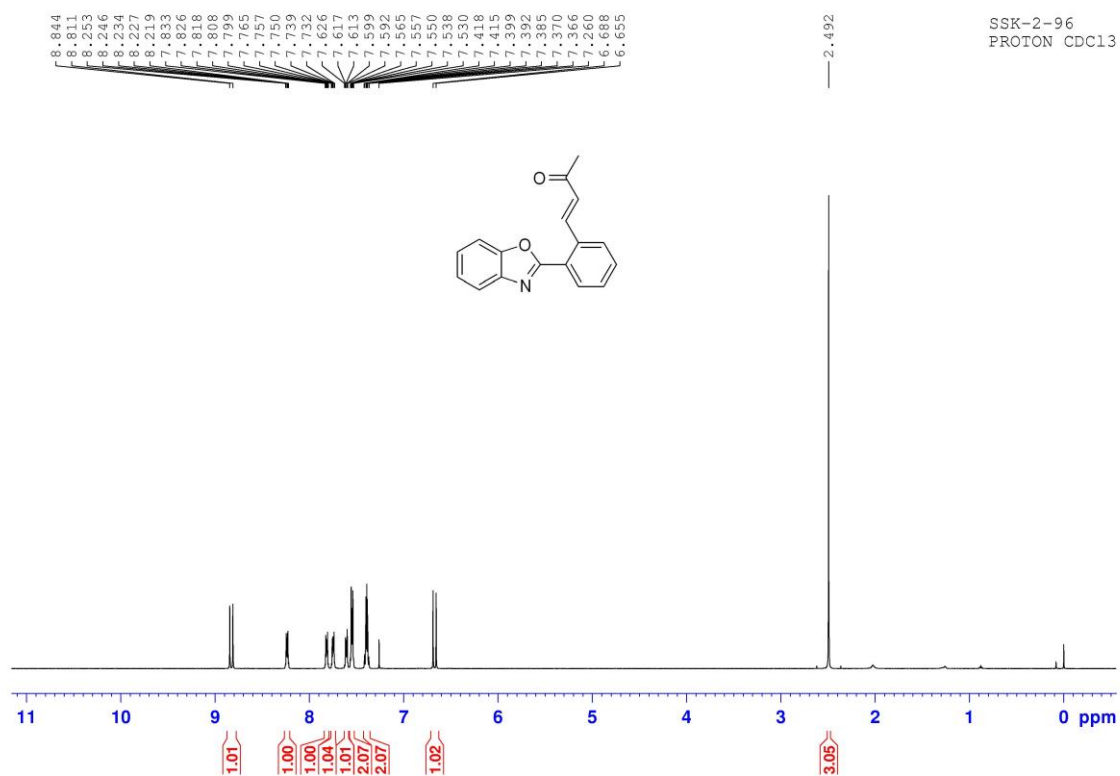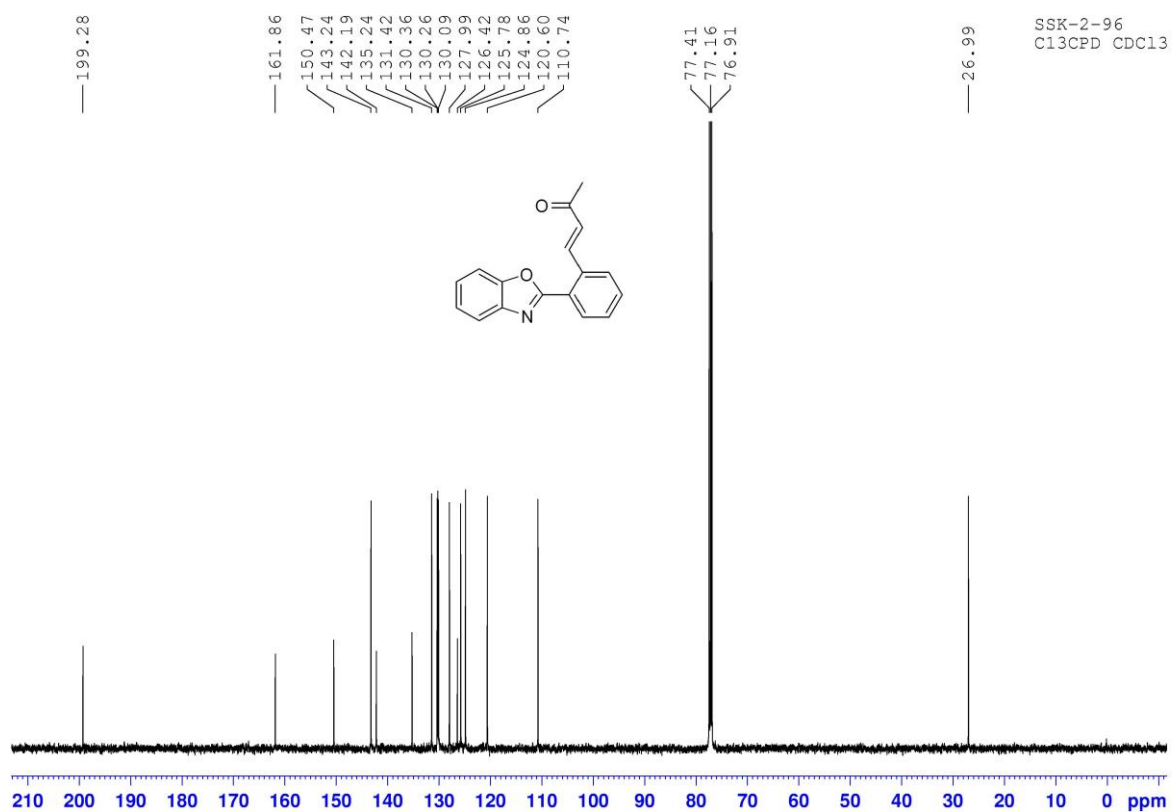

# Compound 3m

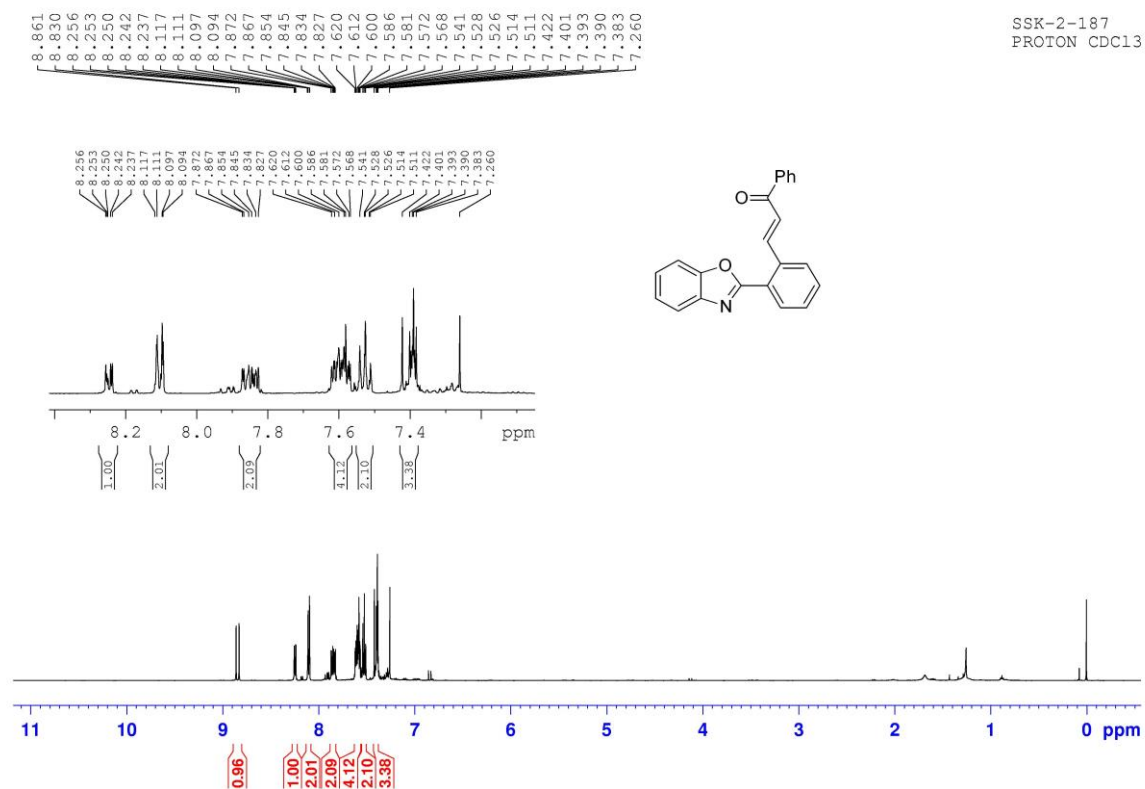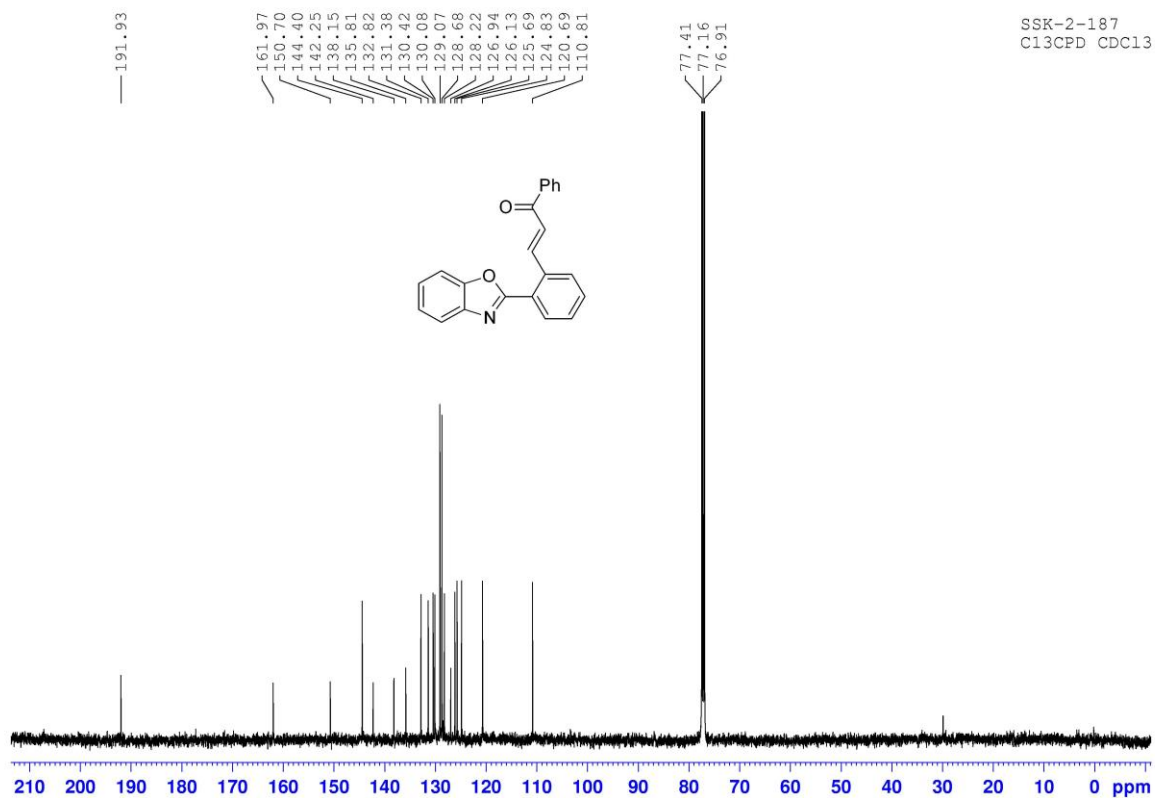

# Compound 3n

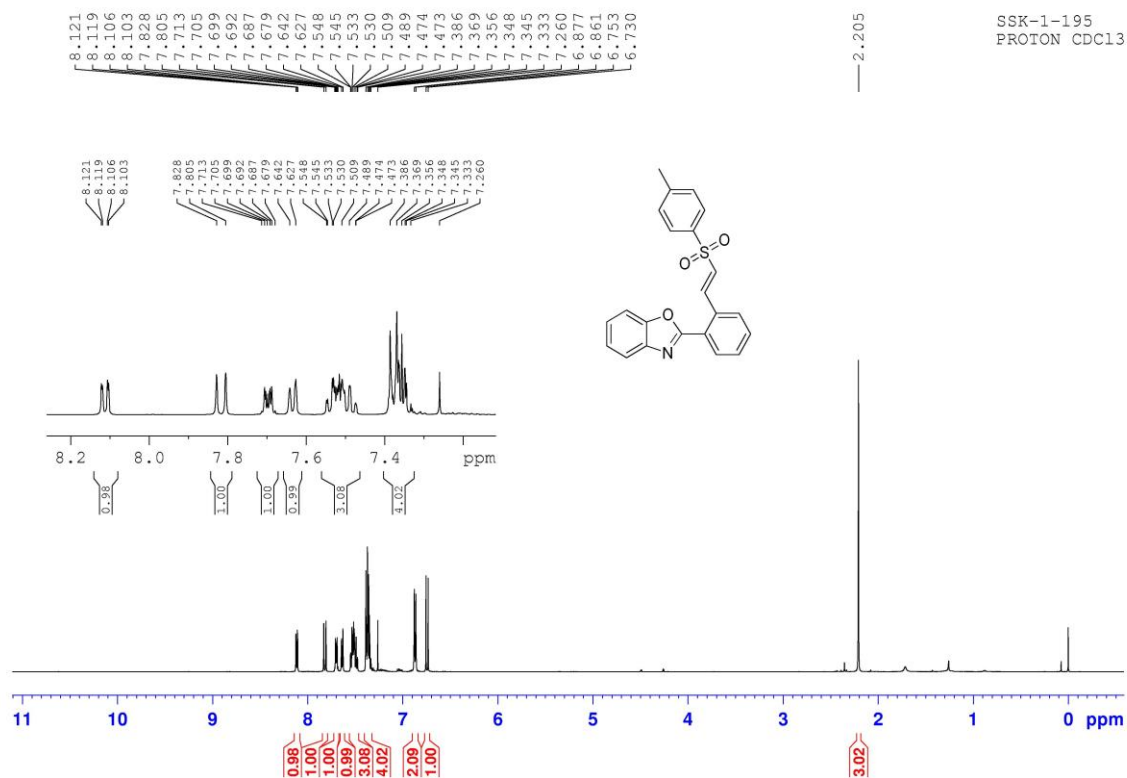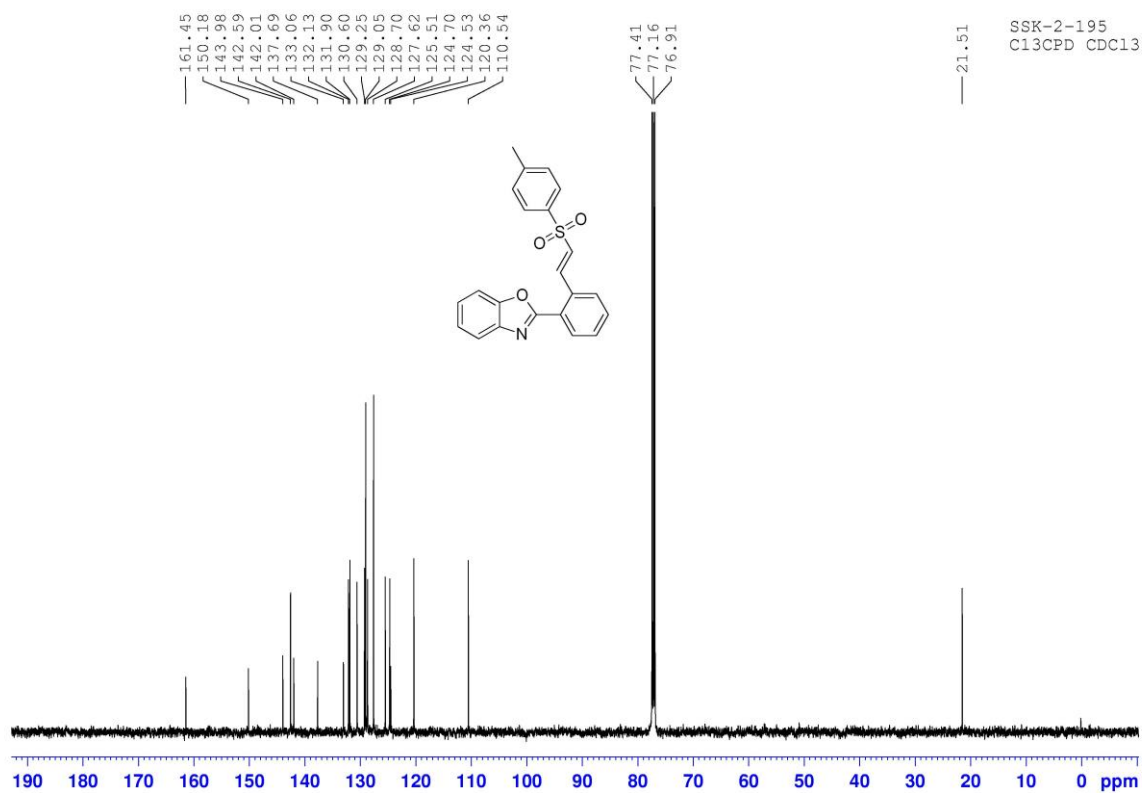

# Compound 4a

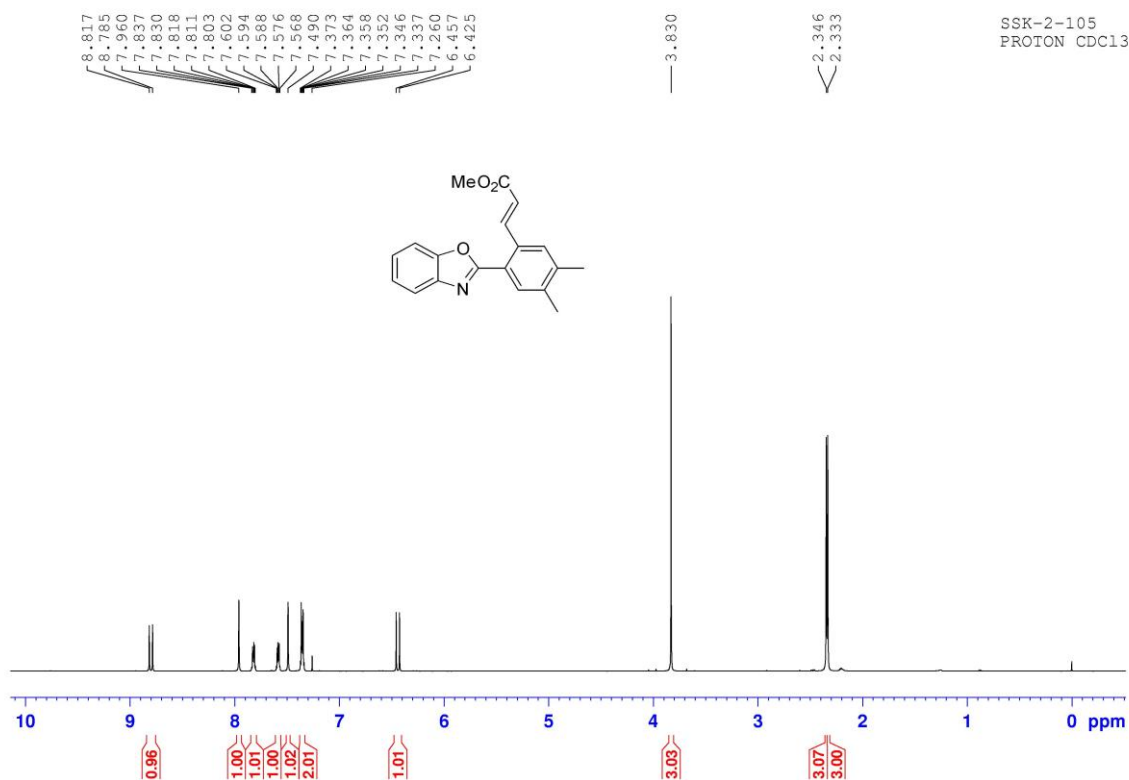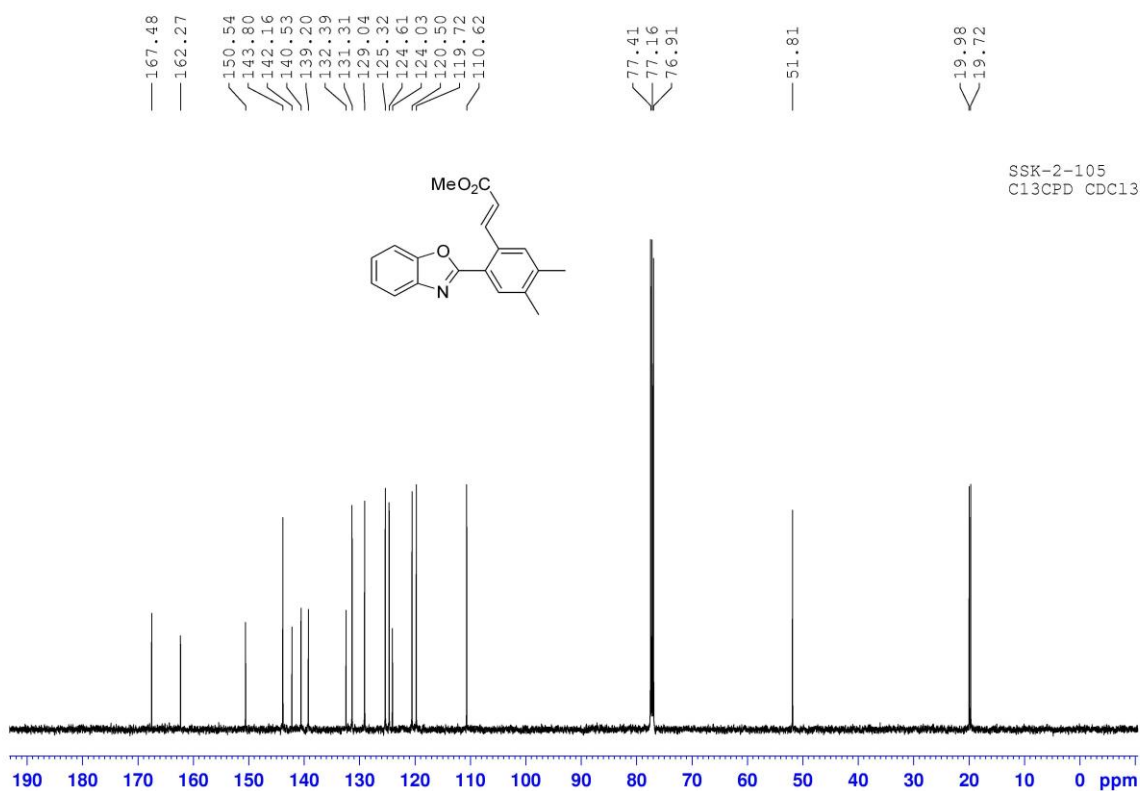

# Compound **4b**

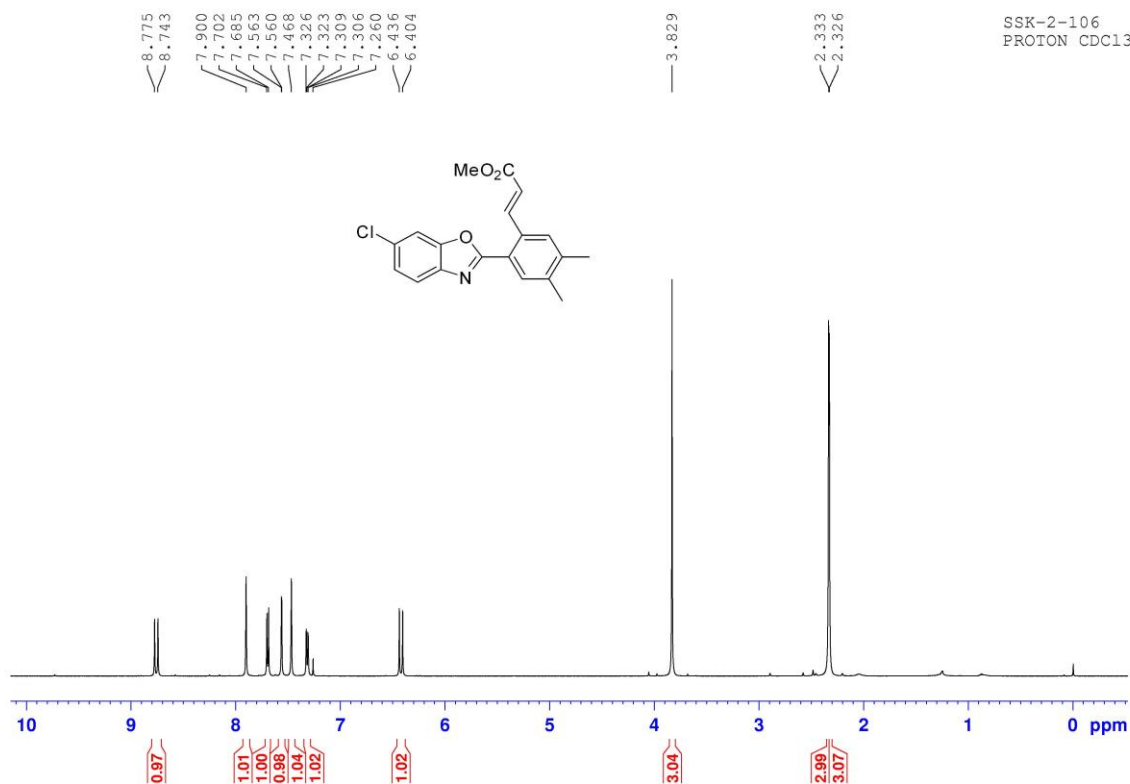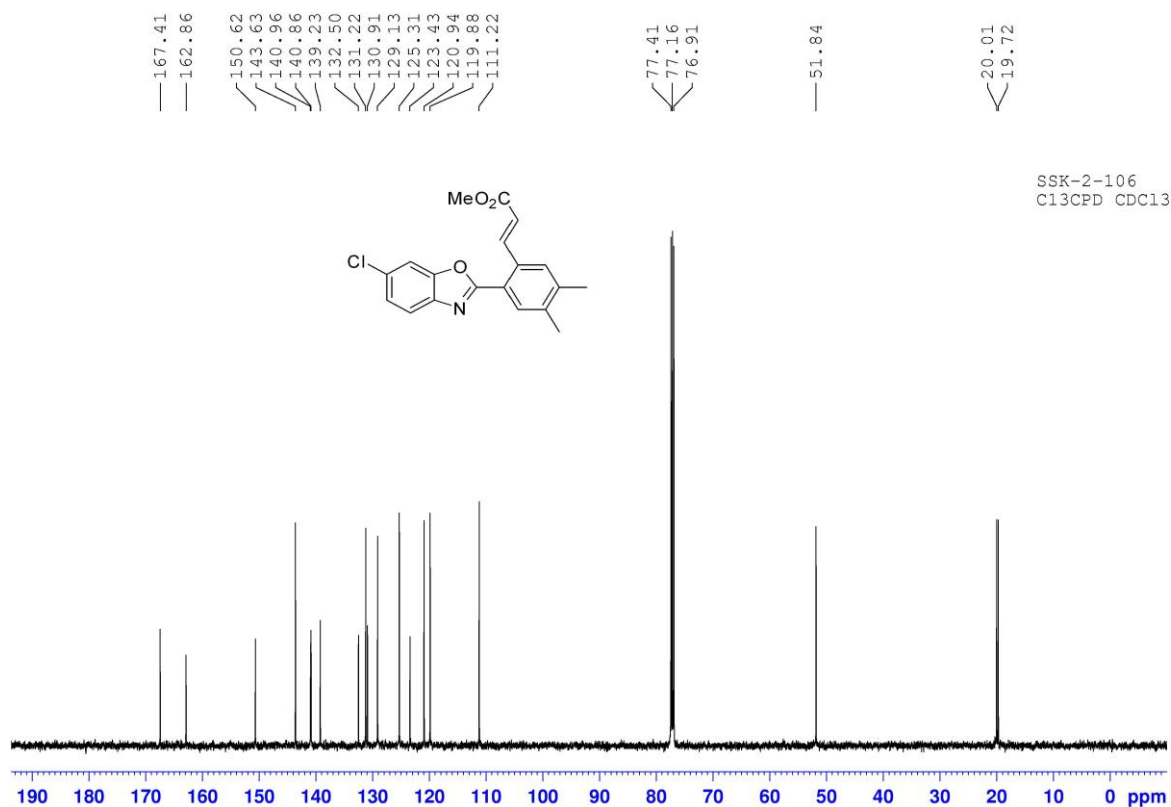

# Compound 4c

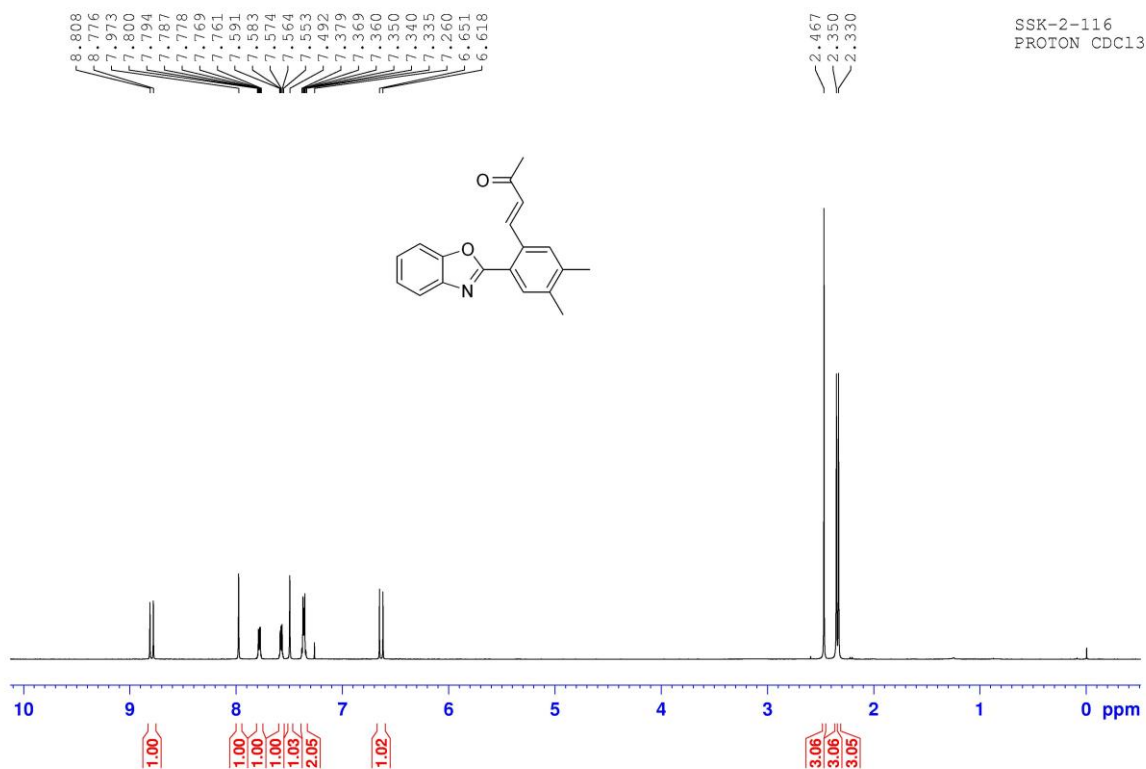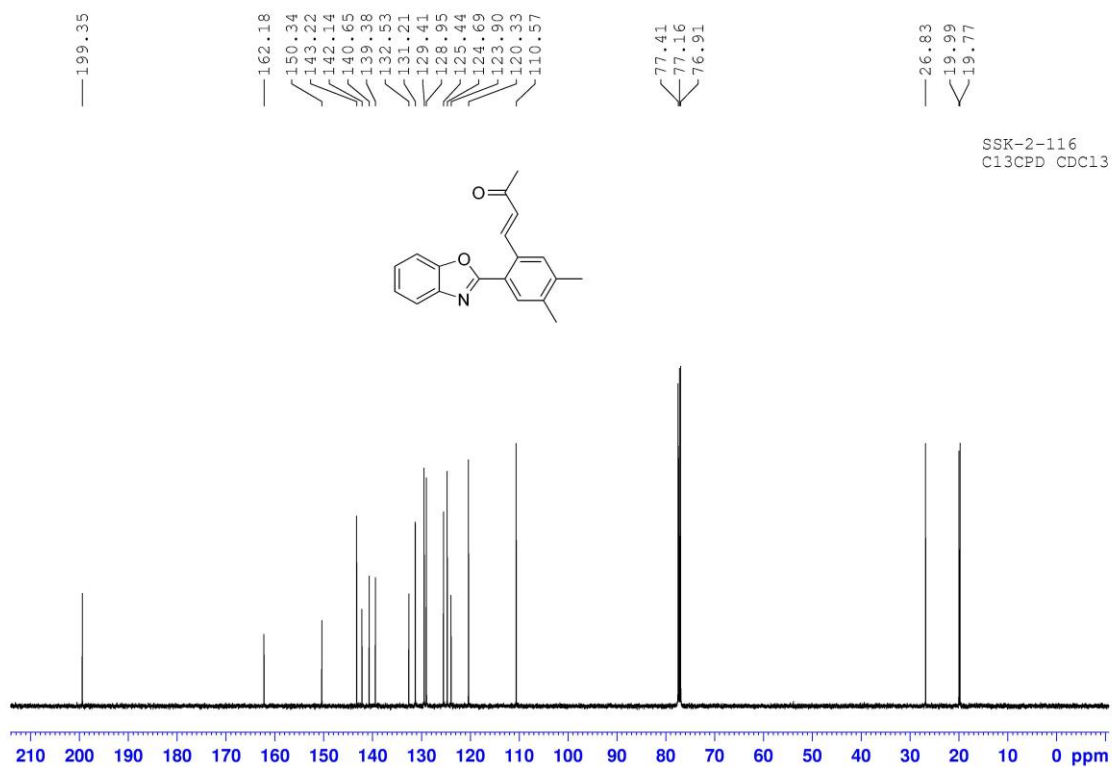

# Compound **4d**

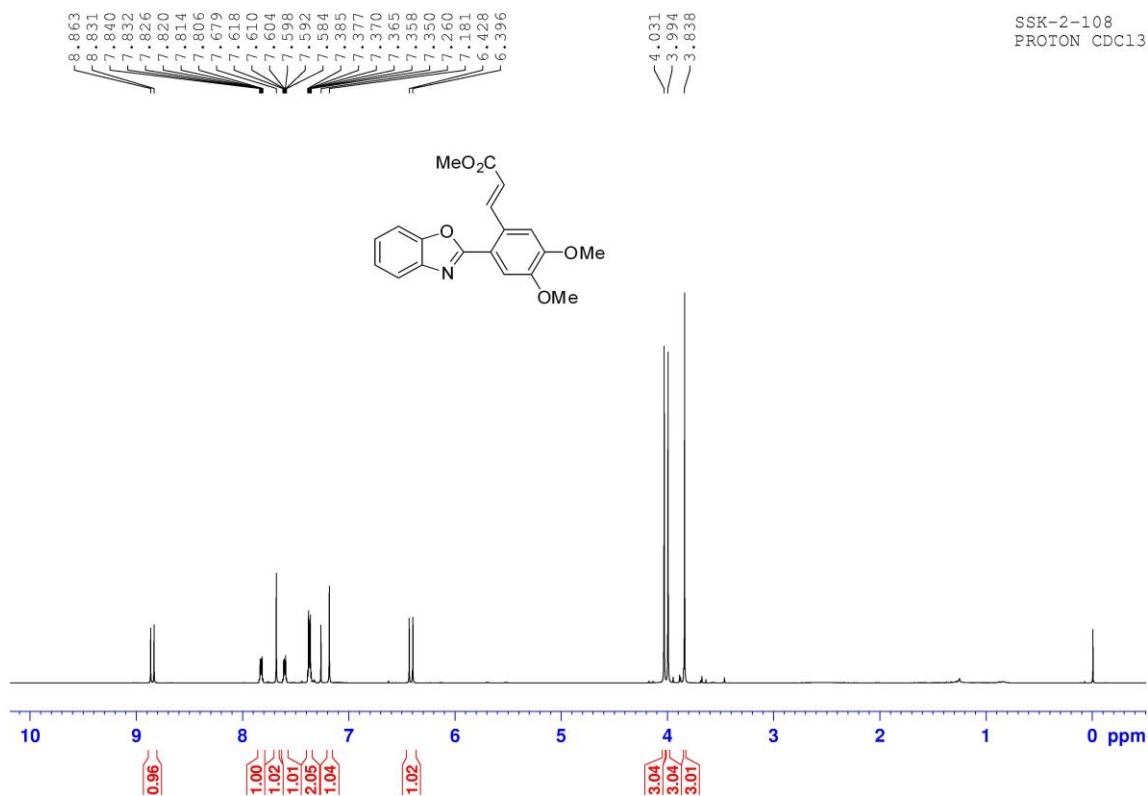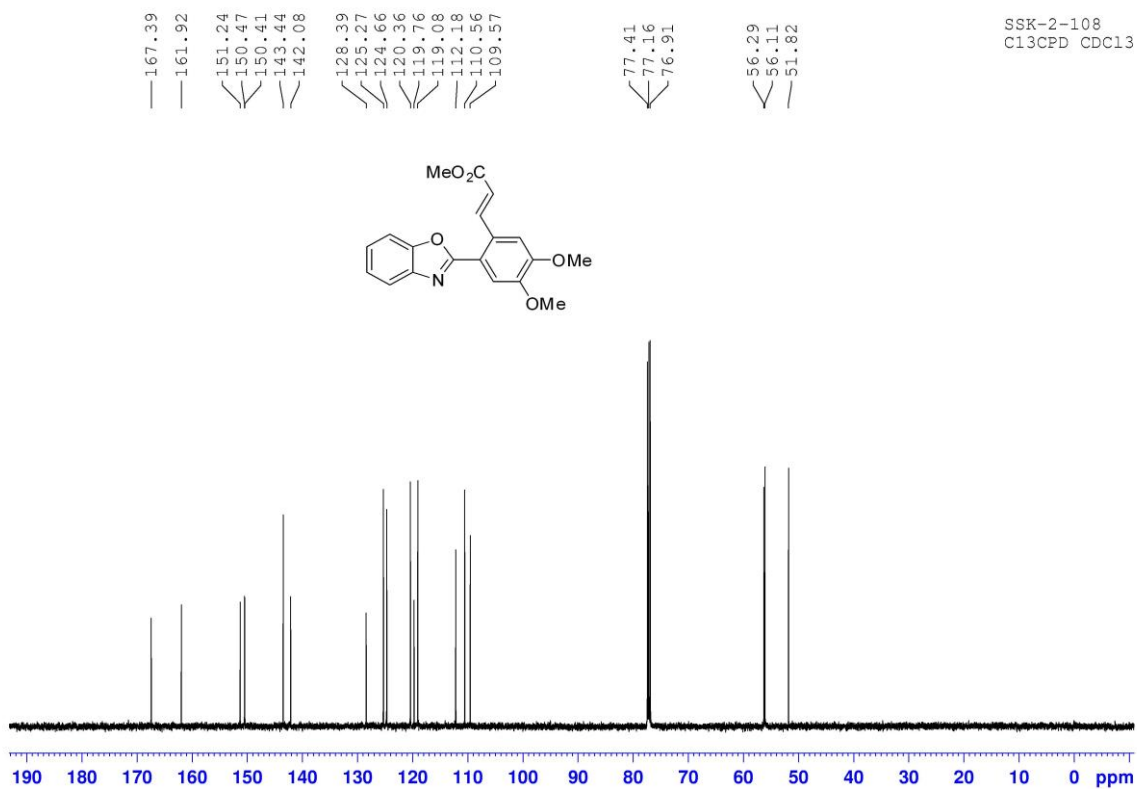

# Compound **4e**

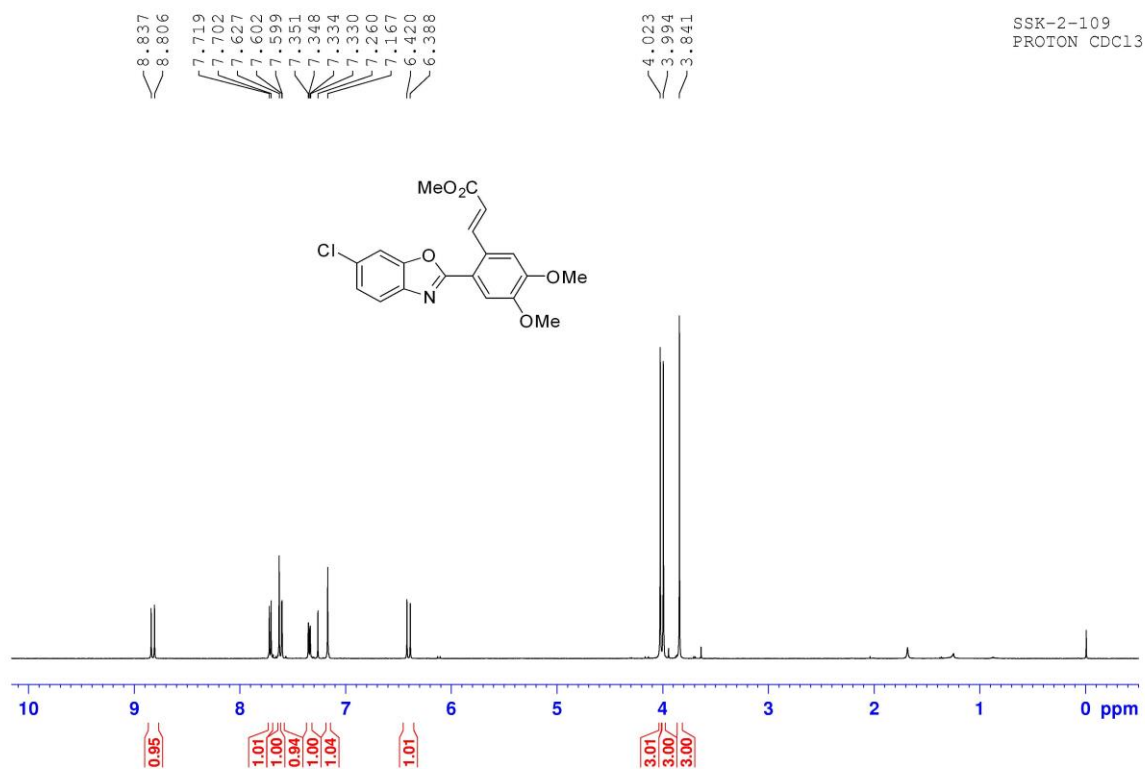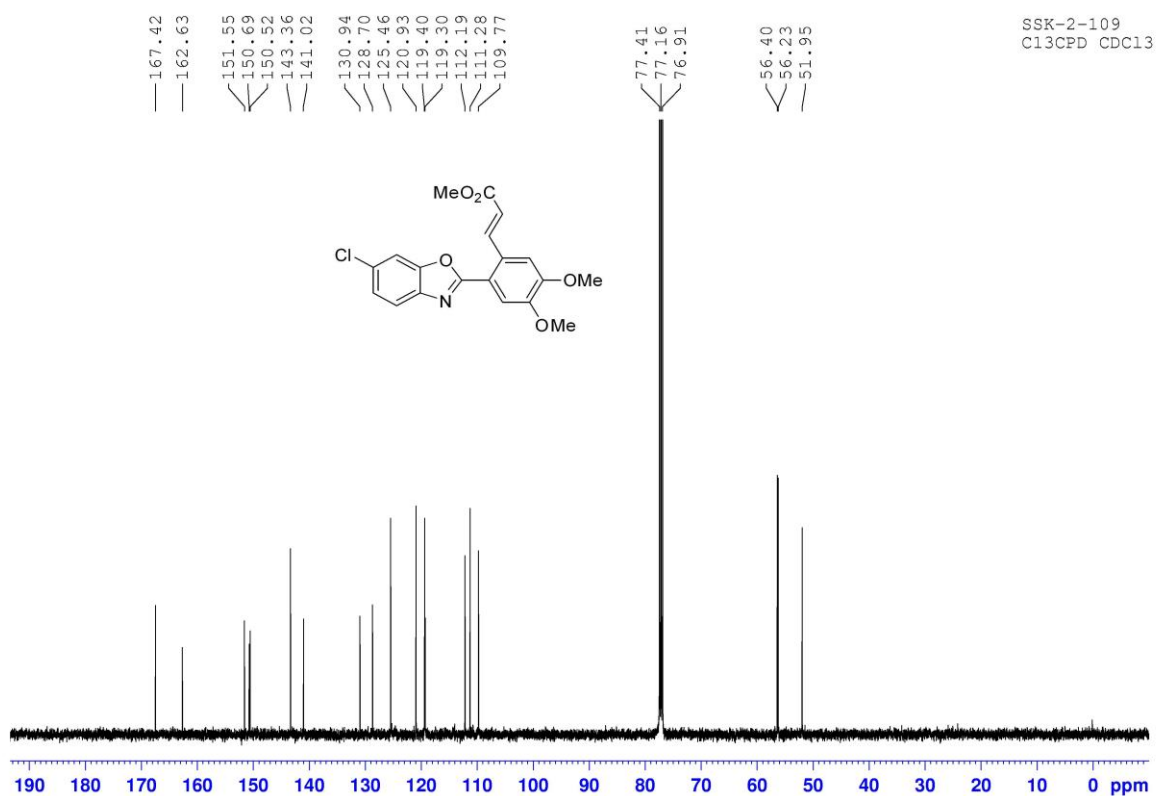

# Compound 4f

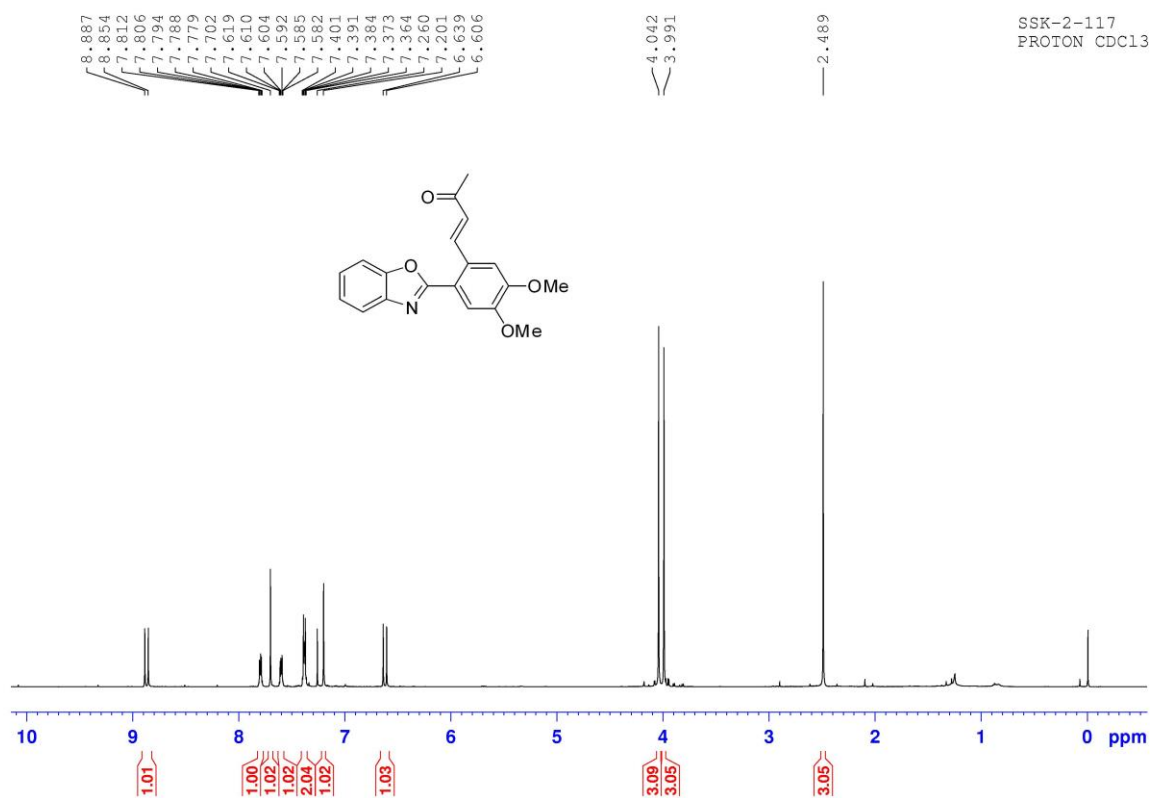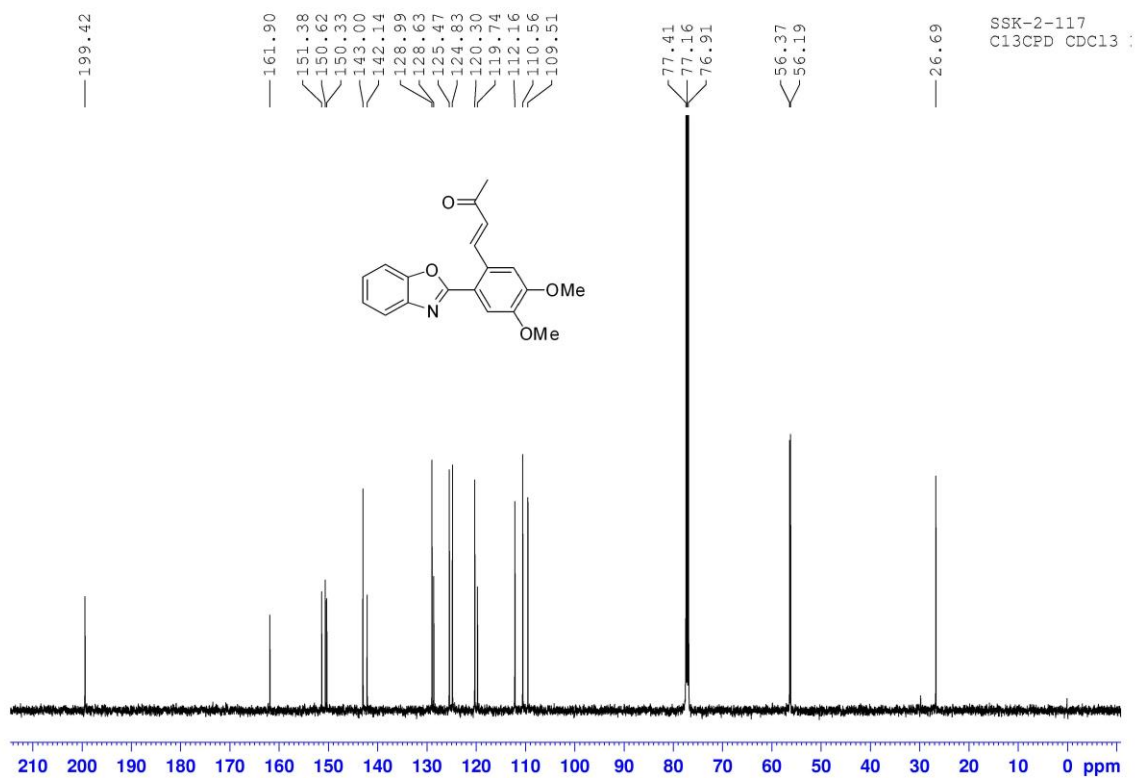

# Compound **4g+4g'**

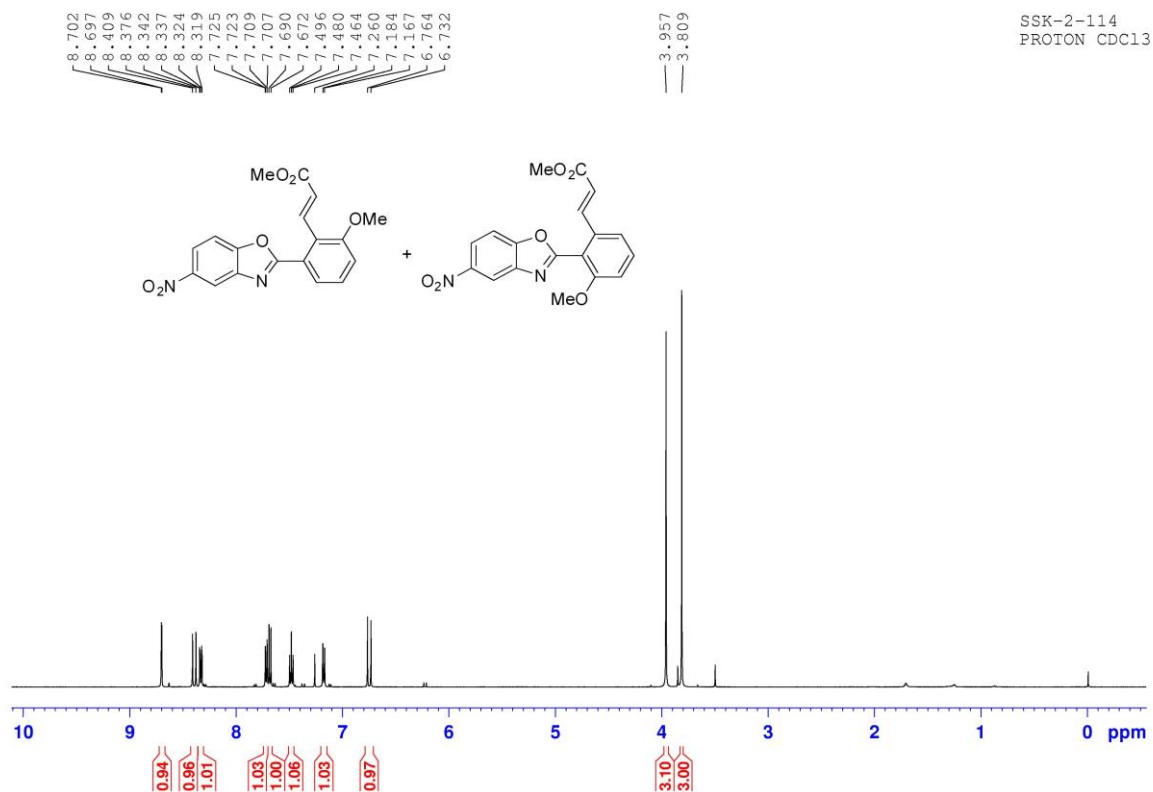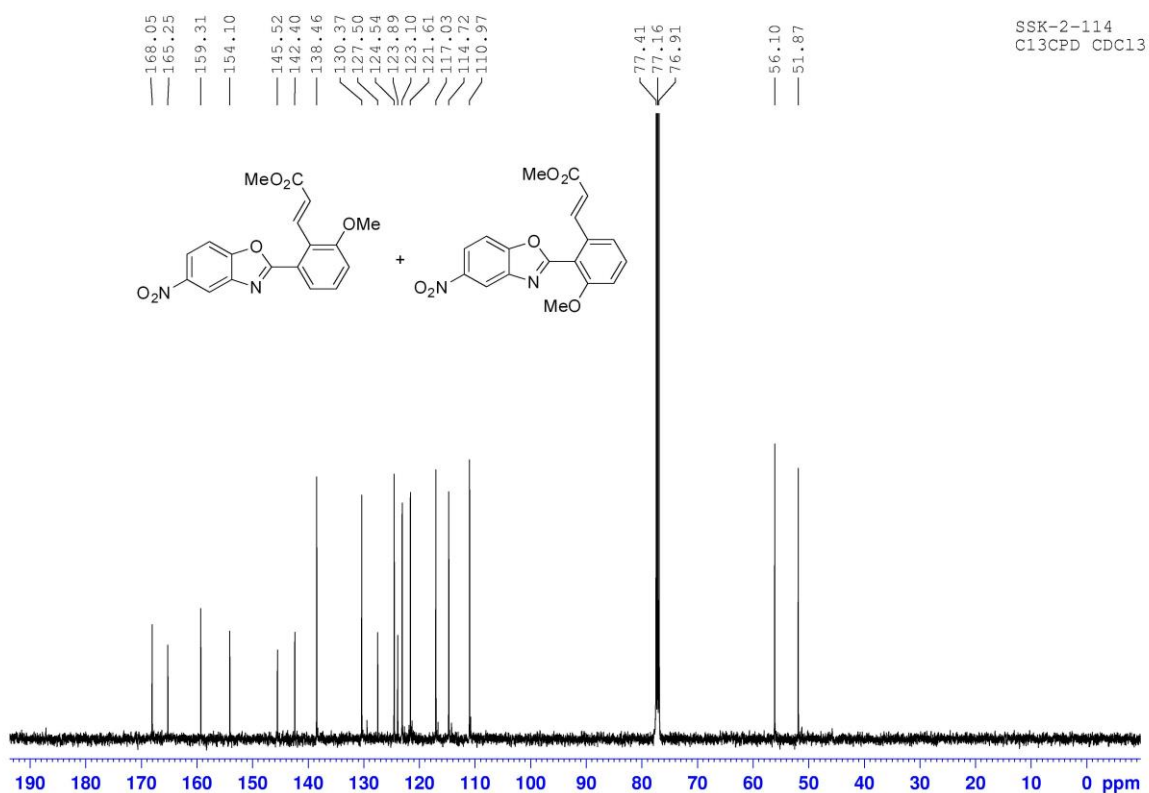

# Compound **4h+4h'**

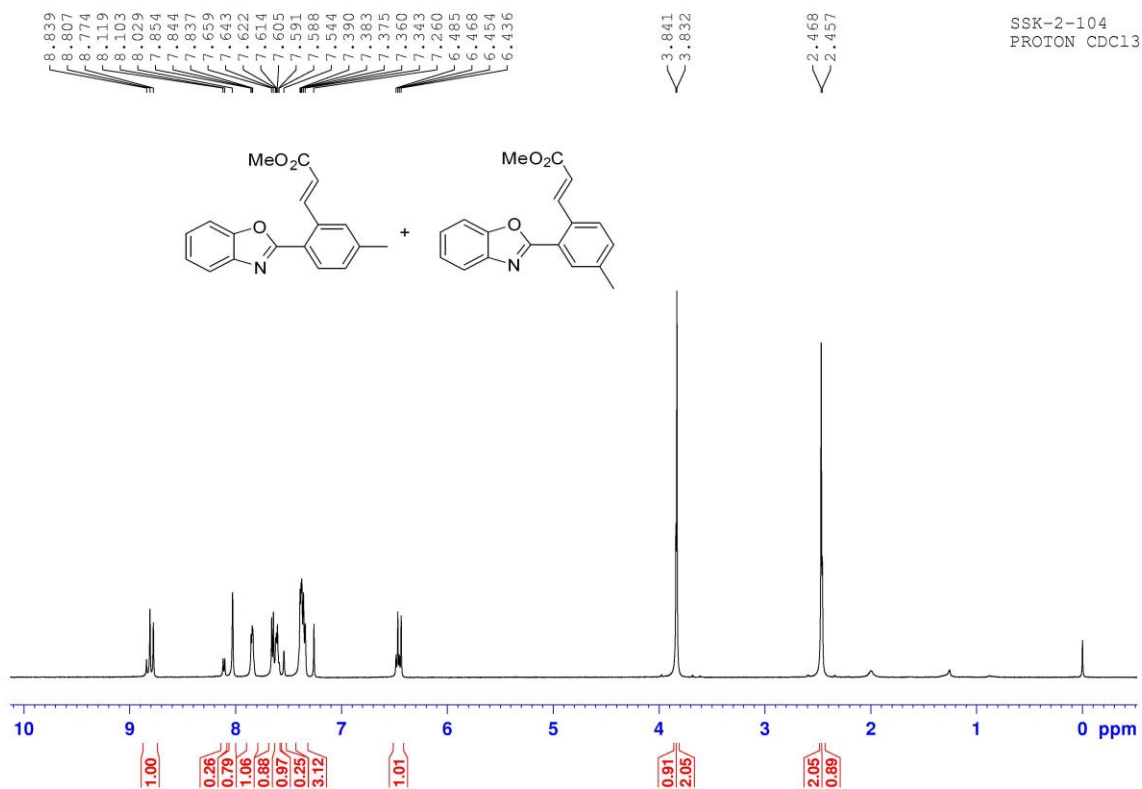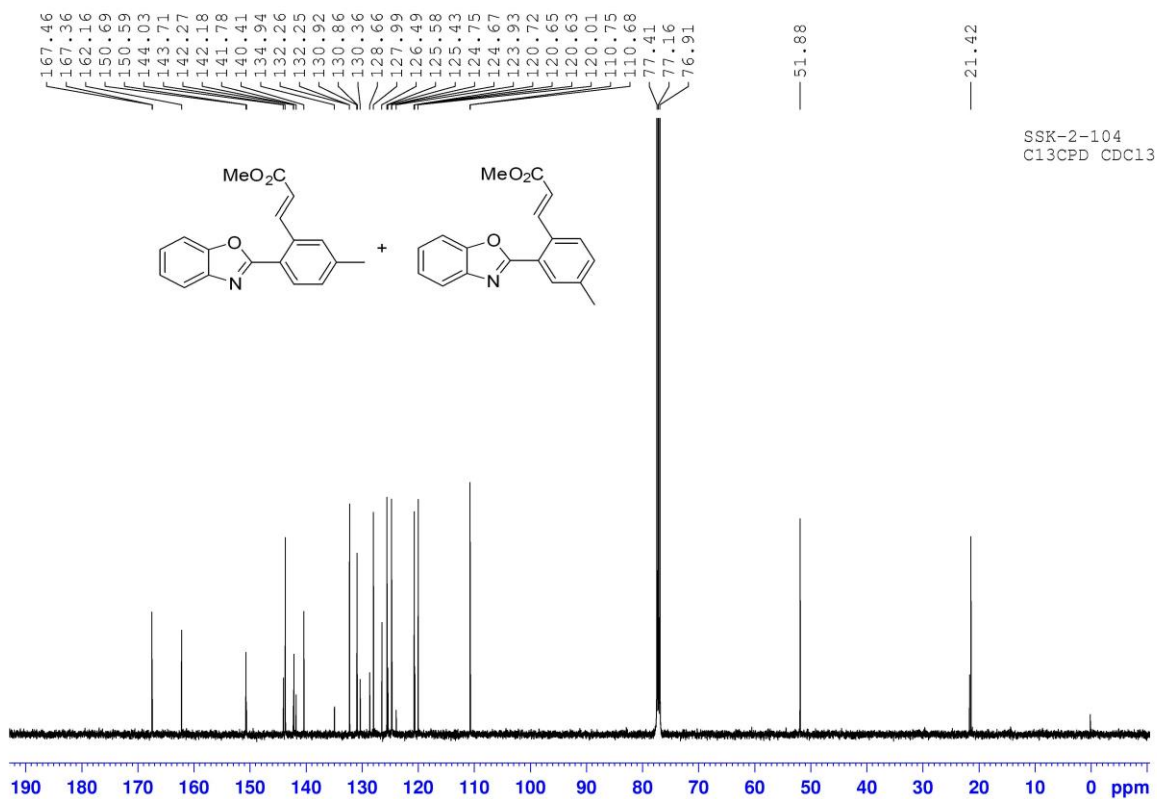

# Compound 6a

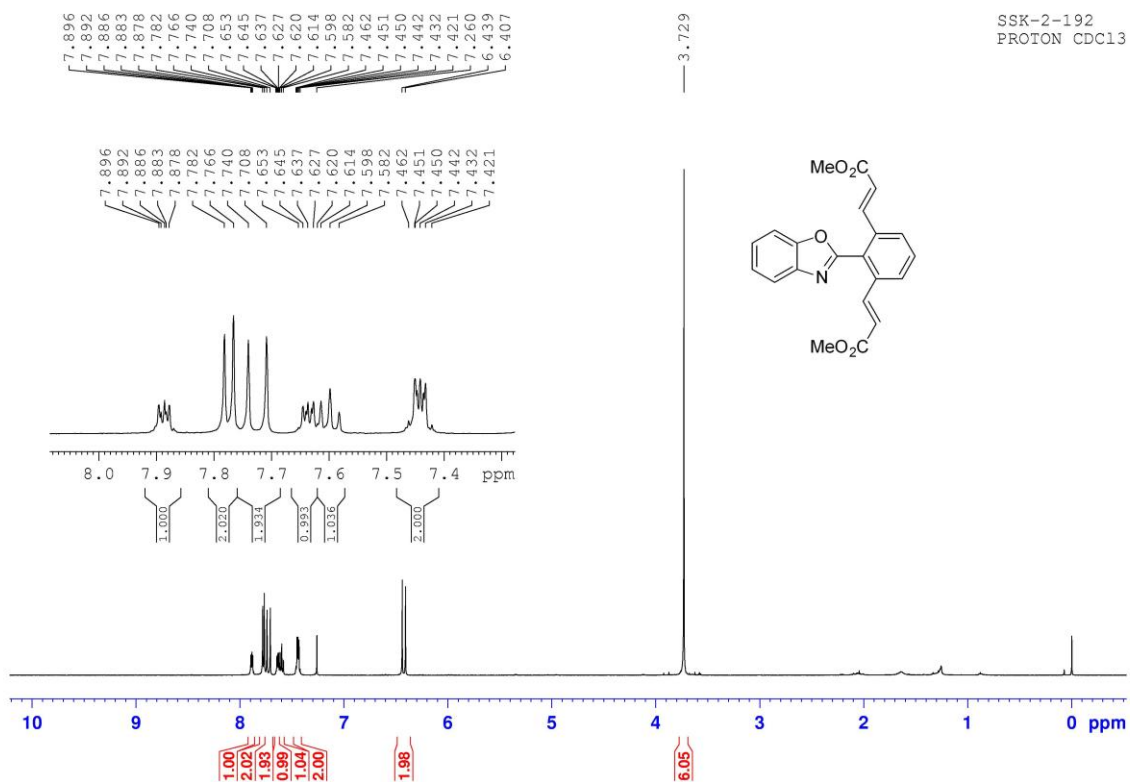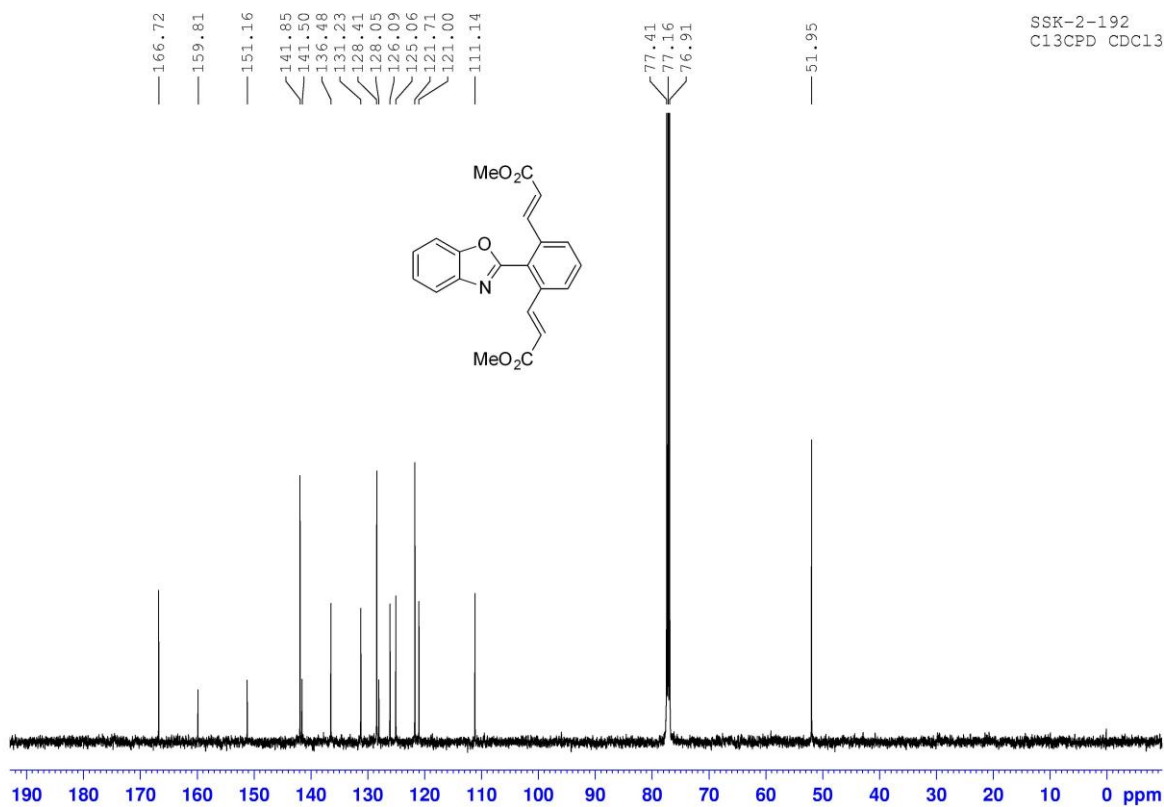

# Compound **6b**

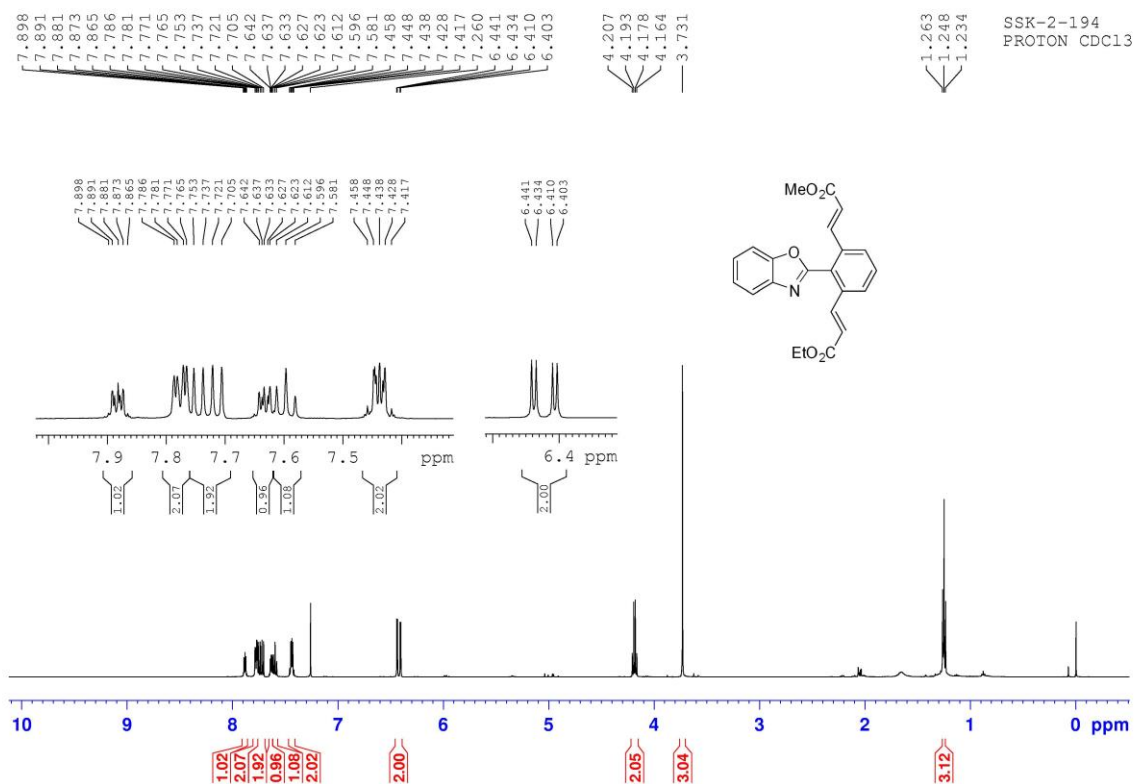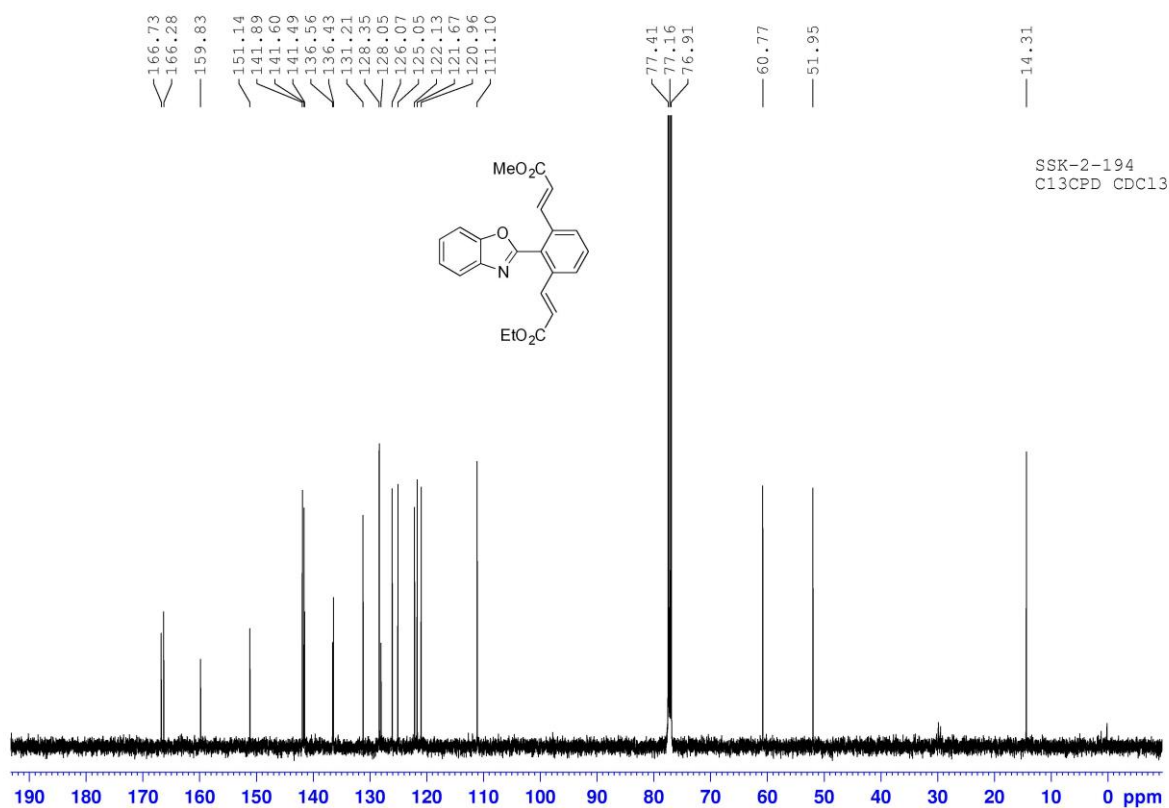

# Compound 6c

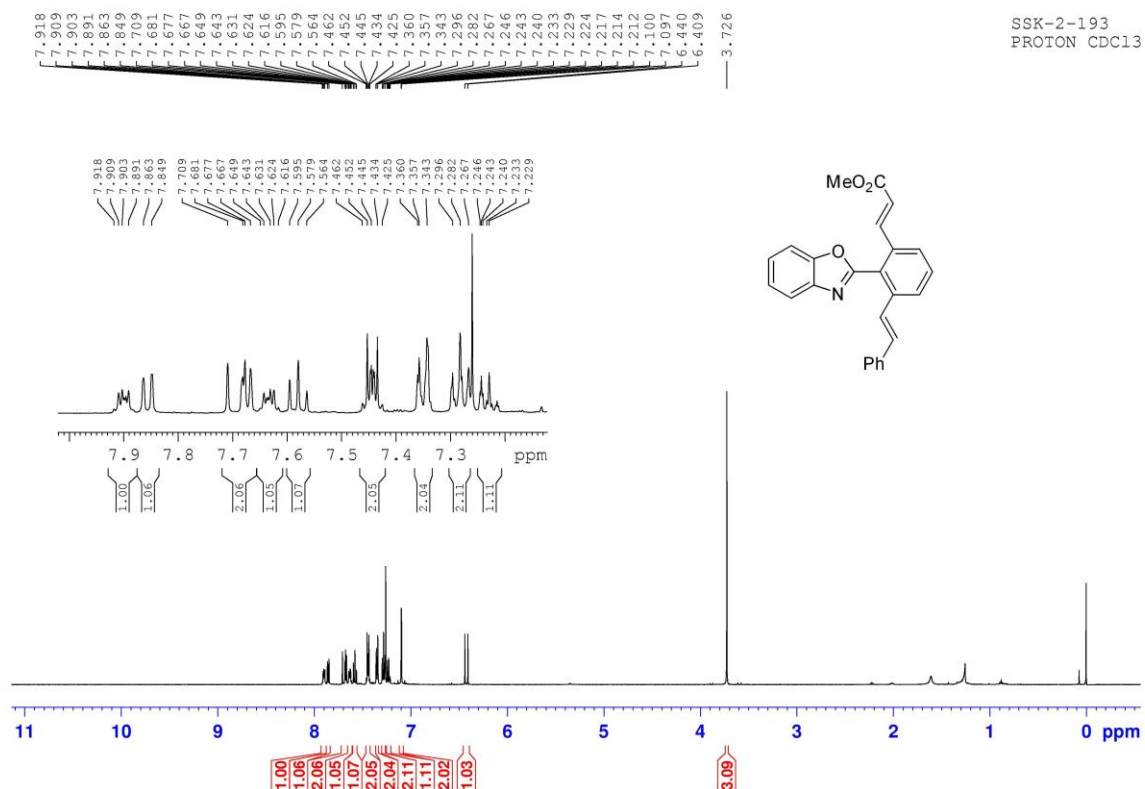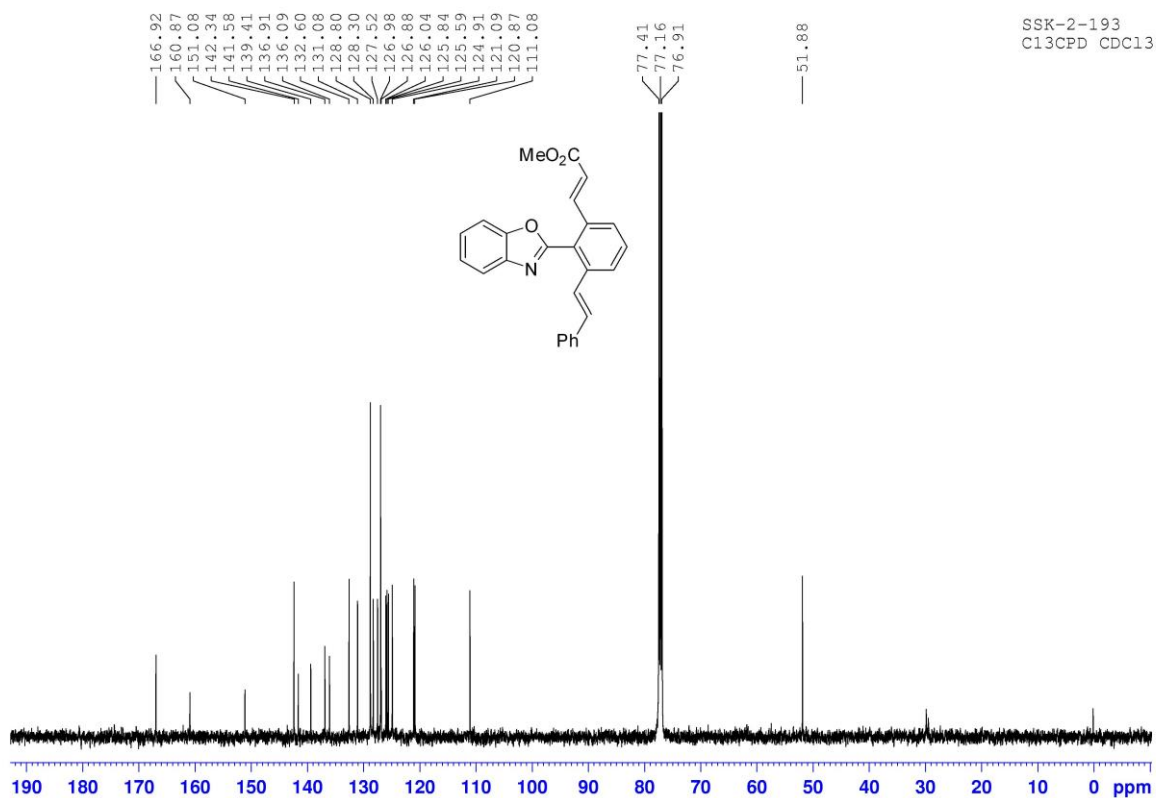

# Compound 8

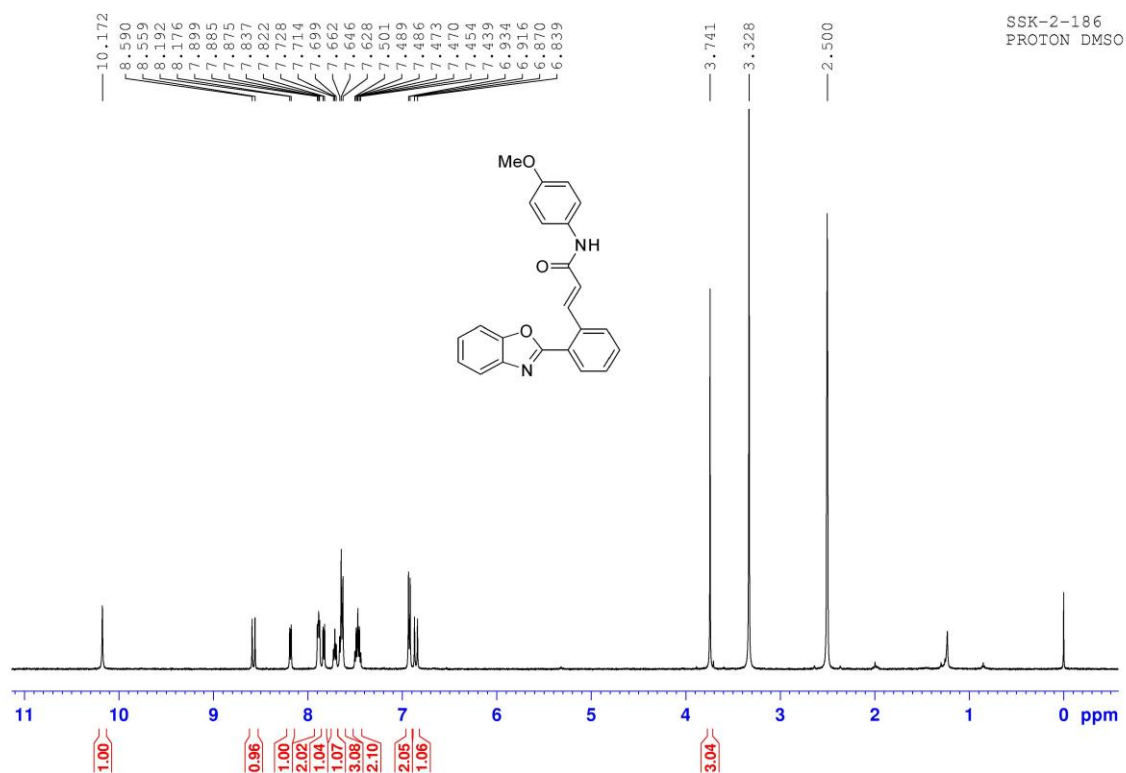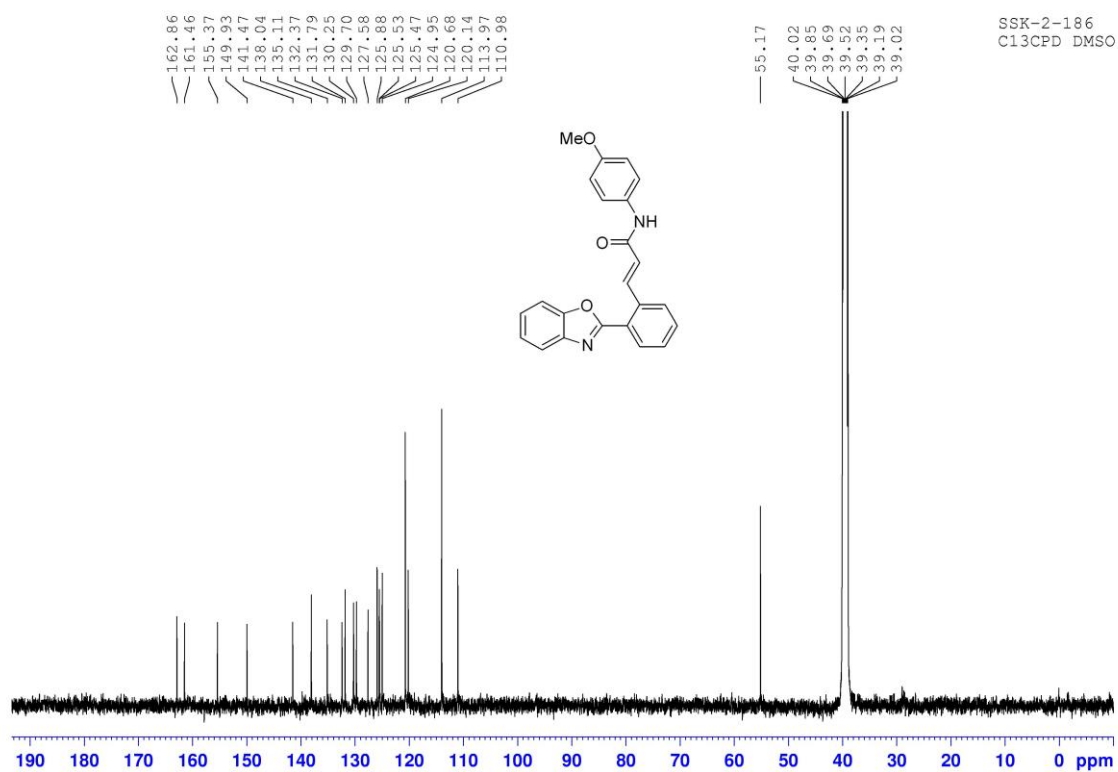

Supplement: c8cc05735d1.pdf [file c8cc05735d1.pdf]
